# Supplementary material
Source: publisher figshare collection journal article supplement (https://geolsoc.figshare.com/ndownloader/files/28864038)
Supplement: Supplementary file 1 [file 28864038]

## Sheet: Sadler Effect
case_name	duration	subsidence	duration rank	subsidence rank
Agrio Formation	1	27	53.5	19.5		PEARSON	0.347881
Alinya Sandstone	50	51	11	13		SPEARMAN	-0.455577
Arikaree Group	7	8.3	40	43
Arran Permian Red Beds	40	15.8	15	27.5
Bakoye Formation	450	5	2	47
Bandeirinha Formation	100	5.6	6.5	45.5
Big Bear Group	250	8.8	5	42
Boxtel Formation (Weichselian Periglacial Deposits)	0.042	64.3	55	10
Caldeirao Member	26	2.4	18	54
Cedar Mesa Sandstone	41	12	13.5	33
Cedar Mesa Sandstone	41	33.5	13.5	16
Chugwater Group	5	11.4	44	34
Copper Harbor Formation	459	540	1	1
Egalapenta Member	73	5.7	9	44
Entrada Sandstone	3	20.9	51.5	25
Eriksfjord Formation (Mussartut Member)	320	9.4	4	40
Escorihuela Formation/Pliocene and Pleistocene deposits of Teruel Basin	5	2.6	44	53
Etjo Formation	1	168	53.5	2
Galesville Member (Wonewoc Formation)	9	24.6	37	23.5
Guara Formation	18	2.8	23.5	50
Hopeman Sandstone	5	12.2	44	32
Huitrin Formation	4	27	48.5	19.5
Ingleside Formation	19	11	20.5	36
Karutola Formation	65	3.2	10	49
Kilmurry Formation	11	166.3	32	3
Lower Cutler Beds	19	9.1	20.5	41
Lower Dala Sandstone	345	2.3	3	55
Mancheral Quartzite	30	13.3	16.5	30.5
Mangabeira Formation	100	5.6	6.5	45.5
Navajo Sandstone	10	30	34	18
Nepean Formation	8	25.4	39	22
Page Sandstone	4	61.6	48.5	11
Pedra Pintada Formation	14	10.9	30.5	37.5
Pewamo Formation	16	26.3	27	21
Piramboia Formation	3	46	51.5	14
Rio Negro Formation	6	15.3	41	29
Rodebjerg Formation	5	98	44	6.5
Rotliegends Group	47	15.8	12	27.5
Sables de Fontainebleau Formation	4	19.5	48.5	26
Sao Sebastio Formation	15	66	28.5	8
Sergi Formation	4	100	48.5	5
Sherwood Sandstone	10	45	34	15
Shikaoda Formation	75	3.7	8	48
Snehvide Formation	5	98	44	6.5
Sofia Sund Formation	15	145.5	28.5	4
St. Peter Sandstone	9	10.8	37	39
Tsondab Formation	20	11.3	19	35
Tumblagooda Sandstone	10	31	34	17
Unayzah Formation A member	18	2.7	23.5	51.5
Unayzah Formation Un-named Middle Member	18	2.7	23.5	51.5
Varzinha Formation	14	10.9	30.5	37.5
Venkatpur Sandstone	30	13.3	16.5	30.5
Whitworth Formation	18	54.6	23.5	12
Wolfville Formation	17	64.7	26	9
Wonewoc Formation	9	24.6	37	23.5

## Sheet: Figure 3
case_name	SUBSIDENCE	CASE THICKNESS	SUBSIDENCE RANK	CASE THICKNESS RANK		GROUP 1	GROUP 2	GROUP 3
Lower Dala Sandstone	2.3	175	55	34		175	213	450		Anova: Single Factor
Caldeirao Member	2.4	62	54	42		62	120	1100
Escorihuela Formation/Pliocene and Pleistocene deposits of Teruel Basin	2.6	32.5	53	52		32.5	200	1000		SUMMARY
Unayzah Formation A member	2.7	30	51.5	53.5		30	230	200		Groups	Count	Sum	Average	Variance
Unayzah Formation Un-named Middle Member	2.7	30	51.5	53.5		30	130	1830		GROUP 1	16	3200.1	200.006	29320.5
Guara Formation	2.8	60.6	50	43		60.6	300			GROUP 2	34	12532.5	368.603	126941
Karutola Formation	3.2	200	49	30.5		200	200			GROUP 3	5	4580	916	401530
Shikaoda Formation	3.7	100	48	38.5		100	65.5
Bakoye Formation	5	125	47	36		125	50
Bandeirinha Formation	5.6	250	45.5	25		250	70			ANOVA
Mangabeira Formation	5.6	500	45.5	14		500	50			Source of Variation	SS	df	MS	F	P-value	F crit
Egalapenta Member	5.7	400	44	20.5		400	412			Between Groups	1.95299e+06	2	976493	8.14402	0.000837774	3.17514
Arikaree Group	8.3	100	43	38.5		100	460			Within Groups	6.23496e+06	52	119903
Big Bear Group	8.8	385	42	22		385	60
Lower Cutler Beds	9.1	200	41	30.5		200	300			Total	8.18795e+06	54
Eriksfjord Formation (Mussartut Member)	9.4	550	40	13		550	50
St. Peter Sandstone	10.8	213	39	27			50			GROUP 1	GROUP 2	GROUP 3
Pedra Pintada Formation	10.9	120	37.5	37			450		MEDIAN	150	221.5	1000
Varzinha Formation	10.9	200	37.5	30.5			25		ST.DEV	171.232	356.287	633.664
Ingleside Formation	11	230	36	26			50
Tsondab Formation	11.3	130	35	35			625
Chugwater Group	11.4	300	34	23.5			700
Cedar Mesa Sandstone	12	200	33	30.5			731
Hopeman Sandstone	12.2	65.5	32	41			442
Mancheral Quartzite	13.3	50	30.5	48			750
Venkatpur Sandstone	13.3	70	30.5	40			400
Rio Negro Formation	15.3	50	29	48			750
Rotliegends Group	15.8	412	27.5	19			1325
Arran Permian Red Beds	15.8	460	27.5	15			56
Sables de Fontainebleau Formation	19.5	60	26	44			35
Entrada Sandstone	20.9	300	25	23.5			833
Wonewoc Formation	24.6	50	23.5	48			200
Galesville Member (Wonewoc Formation)	24.6	50	23.5	48			1100
Nepean Formation	25.4	450	22	16.5			1100
Pewamo Formation	26.3	25	21	55
Huitrin Formation	27	50	19.5	48
Agrio Formation	27	625	19.5	12
Navajo Sandstone	30	700	18	11
Tumblagooda Sandstone	31	731	17	10
Cedar Mesa Sandstone	33.5	442	16	18
Sherwood Sandstone	45	750	15	8.5
Piramboia Formation	46	400	14	20.5
Alinya Sandstone	51	750	13	8.5
Whitworth Formation	54.6	1325	12	2
Page Sandstone	61.6	56	11	45
Boxtel Formation (Weichselian Periglacial Deposits)	64.3	35	10	51
Wolfville Formation	64.7	833	9	7
Sao Sebastio Formation	66	200	8	30.5
Rodebjerg Formation	98	1100	6.5	4
Snehvide Formation	98	1100	6.5	4
Sergi Formation	100	450	5	16.5
Sofia Sund Formation	145.5	1100	4	4
Kilmurry Formation	166.3	1000	3	6
Etjo Formation	168	200	2	30.5
Copper Harbor Formation	540	1830	1	1
			PEARSON CORREL.	0.688429
			SPEARMAN CORREL.	0.490708
			PEARSON P-VALUE	6.29614e-09
			SPEARMAN P-VALUE	0.000137358	4.09997

## Sheet: Figure 4
ALL AEOLIAN ARCHITECTURAL ELEMENTS															ALL NON-AEOLIAN ARCHITECTURAL ELEMENTS															SANDSHEET THICKNESS
Group 1	Group 2	Group 3	Group 1												Group1	Group 2	Group 3													Group 1	Group 2	Group 3	Group1
0.6	0.25	1.5	0.6			Anova: Single Factor									3	0.5	0.75				Anova: Single Factor									0.2	0.25	1	0.2
1.5	1	1	1.5												0.8	0.25	0.5													0.4	1	0.25	0.4		Anova: Single Factor
1.5	0.75	0.5	1.5			SUMMARY									0.8	8	1				SUMMARY									0.1	0.75	5	0.1
1.5	0.75	0.75	1.5			Groups	Count	Sum	Average	Variance					0.5	7	0.5				Groups	Count	Sum	Average	Variance					0.15	0.75	0.5	0.15		SUMMARY
0.3	0.75	0.75	0.3			Group 1	695	1860.5	2.67698	137.794					0.5	7	0.75				Group1	314	1255.15	3.99729	87.004					0.1	0.75		0.1		Groups	Count	Sum	Average	Variance
0.3	1	0.5	0.3			Group 2	1349	4833	3.58265	27.3593					3.5	38	1				Group 2	891	2637	2.9596	25.6387					0.1	1		0.1		Group 1	172	465.35	2.70552	119.365
0.9	1	0.5	0.9			Group 3	387	3357.75	8.67636	129.445					1.2	15	0.6				Group 3	143	538.7	3.76713	248.563					0.2	1		0.2		Group 2	372	932.58	2.50694	12.1352
0.6	0.75	0.25	0.6												0.2	30	0.6													0.15	0.75		0.15		Group 3	4	6.75	1.6875	4.97396
0.9	0.5	0.25	0.9												0.1	3	0.5													0.1	0.5		0.1
0.6	0.75	0.25	0.6			ANOVA									0.3	3	0.5				ANOVA					P-value	F crit			0.05	0.75		0.05
0.9	0.5	1	0.9			Source of Variation	SS	df	MS	F	P-value	F crit			8.15	10	0.25				Source of Variation	SS	df	MS	F	0.104683	3.00241			0.15	0.5		0.15		ANOVA
0.6	0.5	0.25	0.6			Between Groups	9870.47	2	4935.24	65.6681	0	2.99943			4	10	0.5				Between Groups	286.893	2	143.446	2.26061					0.15	0.5		0.15		Source of Variation	SS	df	MS	F	P-value	F crit
0.4	1.5	0.2	0.4			Within Groups	182475	2428	75.1543						1	4	0.4				Within Groups	85346.6	1345	63.4547						0.1	1.5		0.1		Between Groups	7.72905	2	3.86453	0.0844886	0.918994	3.01226
0.8	10	4	0.8												0.5	4	0.1													0.1	2		0.1		Within Groups	24928.4	545	45.7402
0.9	8	0.6	0.9			Total	192345	2430							0.25	2.5	0.1				Total	85633.5	1347							0.15	1.5		0.15
0.9	10	1	0.9												1.25	5	0.1													0.15	1		0.15		Total	24936.1	547
0.8	15	1	0.8												0.4	5	0.25													0.15	1		0.15
1.2	15	1	1.2			t-Test: Two-Sample Assuming Equal Variances									0.4	5	0.15				t-Test: Two-Sample Assuming Equal Variances									0.1	1.5		0.1		t-Test: Two-Sample Assuming Equal Variances
0.9	17	0.6	0.9												1	6	0.2										0.0215593			0.025	1.5		0.025
1.2	7.5	1.5	1.2				Group 1	Group 2		Bonferroni Correction		0.0242008			0.5	7	0.15					Group1	Group 2		Bonferroni correction					0.025	1.5		0.025			Group 1	Group 2		bonferroni correction		1.12629
1.2	7.5	2	1.2			Mean	2.67698	3.58265							3.8	4	0.15				Mean	3.99729	2.9596							0.1	1.5		0.1		Mean	2.70552	2.50694
0.5	15	4	0.5			Variance	137.794	27.3593							2	11.5	0.1				Variance	87.004	25.6387							0.1	1.5		0.1		Variance	119.365	12.1352
0.4	2.5	1.5	0.4			Observations	695	1349							0.2	12	0.2				Observations	314	891							0.05	2		0.05		Observations	172	372
0.2	2	1	0.2			Pooled Variance	64.8918								0.4	11	0.15				Pooled Variance	41.6049								0.05	0.5		0.05		Pooled Variance	45.9658
0.1	4	1.2	0.1			Hypothesized Mean Difference	0								1.25	38	0.15				Hypothesized Mean Difference	0								0.05	1		0.05		Hypothesized Mean Difference	0
0.1	2	2.2	0.1			df	2042								1	6	0.2				df	1203								0.05	5		0.05		df	542
0.1	5	0.75	0.1			t Stat	-2.40787								0.15	1	0.2				t Stat	2.45137								0.05	7		0.05		t Stat	0.317666
0.5	3	0.75	0.5			P(T<=t) one-tail	0.00806692								0.25	0.5	0.2				P(T<=t) one-tail	0.00718644								0.05	25		0.05		P(T<=t) one-tail	0.37543
0.2	2.5	0.75	0.2			t Critical one-tail	1.6456								0.4	0.5	0.2				t Critical one-tail	1.64612								0.1	0.1		0.1		t Critical one-tail	1.64767
0.1	3	1.5	0.1			P(T<=t) two-tail	0.0161338								0.25	0.5	0.15				P(T<=t) two-tail	0.0143729								0.1	0.1		0.1		P(T<=t) two-tail	0.75086
1.2	8	1.2	1.2			t Critical two-tail	1.96113								0.8	0.5	0.15				t Critical two-tail	1.96194								0.05	1		0.05		t Critical two-tail	1.96435
0.25	10	0.2	0.25												0.4	0.75	0.2													0.1	1		0.1
0.2	2.5	0.2	0.2												2	0.75	0.75				t-Test: Two-Sample Assuming Equal Variances									0.1	6.5		0.1
0.5	3	0.2	0.5			t-Test: Two-Sample Assuming Equal Variances									0.4	0.75	0.2										0.348801			0.4	0.9		0.4		t-Test: Two-Sample Assuming Equal Variances
0.15	5	1.5	0.15												2	1.5	0.2					Group 2	Group 3		Bonferroni correction					0.4	1.5		0.4
2	2	0.3	2				Group 2	Group 3		Bonferroni Correction		4.00472e-34			1	0.5	0.15				Mean	2.9596	3.76713							0.5	1.3		0.5			Group 2	Group 3		bonferroni correction		0.958949
2.75	5	0.3	2.75			Mean	3.58265	8.67636							0.3	0.5	0.1				Variance	25.6387	248.563							0.25	0.5		0.25		Mean	2.50694	1.6875
4	5	1.5	4			Variance	27.3593	129.445							0.5	1.75	0.1				Observations	891	143							0.4	0.75		0.4		Variance	12.1352	4.97396
1	5	0.25	1			Observations	1349	387							0.3	2	0.1				Pooled Variance	56.3123								0.1	0.25		0.1		Observations	372	4
8	5	1	8			Pooled Variance	50.0841								0.5	0.75	0.05				Hypothesized Mean Difference	0								0.3	2		0.3		Pooled Variance	12.0778
10	5	1	10			Hypothesized Mean Difference	0								0.4	0.75	0.5				df	1032								0.25	0.5		0.25		Hypothesized Mean Difference	0
2	2	0.3	2			df	1734								0.6	2.5	0.6				t Stat	-1.19456								0.25	0.2		0.25		df	374
2	2	1.25	2			t Stat	-12.4816								0.6	0.5	0.5				P(T<=t) one-tail	0.116267								0.25	0.2		0.25		t Stat	0.469061
2	7.5	4.5	2			P(T<=t) one-tail	1.33491e-34								2	1.5	2.1				t Critical one-tail	1.64633								0.25	0.5		0.25		P(T<=t) one-tail	0.31965
2	2.5	0.3	2			t Critical one-tail	1.64573								0.6	1.5	0.5				P(T<=t) two-tail	0.232534								0.25	0.2		0.25		t Critical one-tail	1.64894
2	7.5	0.8	2			P(T<=t) two-tail	2.66982e-34								0.75	0.5	0.15				t Critical two-tail	1.96227								0.15	1.2		0.15		P(T<=t) two-tail	0.639299
2	5	0.2	2			t Critical two-tail	1.96133								1.75	0.75	0.15													1.1	2		1.1		t Critical two-tail	1.96633
2	10	1.5	2												2.25	0.75	0.2				t-Test: Two-Sample Assuming Equal Variances									0.2	2		0.2
1.5	12	0.5	1.5												1.9	1.25	1										1.26867			0.5	0.2		0.5
1.5	5	0.4	1.5			t-Test: Two-Sample Assuming Equal Variances									2.3	0.75	0.1					Group 3	Group1		Bonferroni correction					1	1.5		1		t-Test: Two-Sample Assuming Equal Variances
1.5	0.5	0.2	1.5												2.5	5	0.6				Mean	3.76713	3.99729							1.25	1		1.25
1	1.5	0.4	1				Group 3	Group 1		Bonferroni Correction		1.53952e-15			1.2	1.5	0.1				Variance	248.563	87.004							0.25	1.5		0.25			Group 3	Group1
1	5	0.5	1			Mean	8.67636	2.67698							2.75	1.5	0.15				Observations	143	314							1.5	2		1.5		Mean	1.6875	2.70552		bonferroni correction		1.27926
1.1	15	0.8	1.1			Variance	129.445	137.794							0.5	1	0.1				Pooled Variance	137.424								1.25	2		1.25		Variance	4.97396	119.365
1.1	1	1.5	1.1			Observations	387	695							3.5	1	0.1				Hypothesized Mean Difference	0								0.8	1.5		0.8		Observations	4	172
1	4	0.8	1			Pooled Variance	134.81								3	1	0.75				df	455								0.2	2		0.2		Pooled Variance	117.392
1	3	1	1			Hypothesized Mean Difference	0								1.2	2	0.25				t Stat	-0.194613								0.2	0.75		0.2		Hypothesized Mean Difference	0
1.3	2	2	1.3			df	1080								1.2	4	0.15				P(T<=t) one-tail	0.422891								0.2	0.75		0.2		df	174
1.1	2	0.8	1.1			t Stat	8.14667								0.3	0.25	0.15				t Critical one-tail	1.64821								1	4		1		t Stat	-0.18577
1.1	3	0.3	1.1			P(T<=t) one-tail	5.13175e-16								0.75	0.5	0.15				P(T<=t) two-tail	0.845782								0.6	4		0.6		P(T<=t) one-tail	0.426421
1.1	10	0.5	1.1			t Critical one-tail	1.64627								0.75	0.75	0.1				t Critical two-tail	1.96519								1	2		1		t Critical one-tail	1.65366
1.1	1	1.2	1.1			P(T<=t) two-tail	1.02635e-15								0.5	0.5	0.15													0.2	3		0.2		P(T<=t) two-tail	0.852841
1	10	1.75	1			t Critical two-tail	1.96216								1.6	0.5	1				Group 1 median		1.35							0.2	2		0.2		t Critical two-tail	1.97369
1.5	15	1	1.5												0.5	2	0.4				Group 2 median		1.2							1.5	10		1.5
0.75	15	0.25	0.75			Group 1 median		1							2	0.25	0.1				Group 3 median		0.25							0.2	1		0.2
3	6	0.25	3			Group 2 median		2							1.7	0.75	0.15													1	7		1
0.5	7	0.25	0.5			Group 3 median		5							2	0.75	2				Group 1 St.Dev		9.32759							1.6	1.5		1.6		Group 1 median		0.275
0.75	2.5	0.25	0.75												5	0.75	1				Group 2 St.Dev		5.06347							0.3	2		0.3		Group 2 median		1.5
1	12	0.5	1			Group 1 St.Dev		11.7385							4	0.75	0.5				Group 3 St.Dev		15.7659							0.75	4		0.75		Group 3 median		0.75
1	3	0.5	1			Group 2 St.Dev		5.23061							1.3	1.5	1													1.2	0.5		1.2
1	9	0.2	1			Group 3 St.Dev		11.3774							1	1.5	0.5													0.6	2		0.6		Group 1 St.Dev		10.9254
1	1	0.5	1												0.5	0.25	1													0.3	0.5		0.3		Group 2 St.Dev		3.48356
1	16	0.3	1												0.6	1.5	0.15													2.75	0.5		2.75		Group 3 St.Dev		2.23024
1	4	0.3	1												0.5	1.5	1													3	2		3
0.5	9	0.5	0.5												0.5	3	1													0.5	1		0.5
1	5	0.5	1												0.5	5	1													0.2	3.8		0.2
0.5	6.5	1.2	0.5												0.5	5	0.5													0.3	0.3		0.3
0.4	7	0.25	0.4												0.6	6	0.25													0.2	0.2		0.2
1.25	3	0.25	1.25												3	2	0.25													0.4	0.5		0.4
0.75	9	1	0.75												0.25	6	0.2													0.05	0.2		0.05
0.75	3	0.75	0.75												1	2.5	0.75													0.05	0.4		0.05
1.1	2.5	0.75	1.1												1	0.25	0.75													0.05	0.4		0.05
0.9	5	0.25	0.9												1	0.25	0.05													0.15	0.2		0.15
0.75	7	0.75	0.75												0.5	0.75	0.05													0.25	0.3		0.25
1.1	2	0.25	1.1												0.1	0.25	0.05													0.05	0.9		0.05
0.5	3	0.25	0.5												0.05	2	0.05													0.2	1.25		0.2
2	4	2.5	2												0.05	1.5	0.1													0.05	1.25		0.05
0.5	2	3.5	0.5												0.05	6	0.1													0.05	0.2		0.05
0.4	2	2.5	0.4												0.25	3	0.1													0.2	1		0.2
1	4	1	1												0.15	1	0.75													0.05	0.3		0.05
0.6	1	1.5	0.6												0.1	0.25	0.2													0.1	0.6		0.1
1.25	2	1.1	1.25												0.05	0.25	1.5													0.05	1		0.05
1.75	1	0.9	1.75												0.25	0.1	0.1													0.05	1		0.05
0.75	1	1.5	0.75												0.5	0.1	0.1													0.05	1.5		0.05
3	1	1	3												0.4	1.9	0.2													0.05	1		0.05
1.4	0.5	3	1.4												0.3	3	0.2													0.05	2.5		0.05
0.4	0.5	0.75	0.4												0.05	1	0.75													0.2	3		0.2
3	0.5	0.75	3												0.05	2	0.5													8	2		8
1	1	0.15	1												0.05	2	0.5													4	0.6		4
0.5	1	0.25	0.5												0.15	4	0.15													4	0.3		4
1	1	0.15	1												16	2	0.5													4	1.9		4
1	1	0.4	1												20	0.25	0.5													4	1.1		4
1.5	2	0.5	1.5												4	0.25	0.1													4	0.76		4
0.75	20	0.5	0.75												12	0.25	0.1													12	0.76		12
1	20	0.75	1												20	0.25	0.15													16	0.91		16
3	20	0.15	3												28	0.25	0.2													4	1.25		4
2	20	2	2												4	0.75	0.15													16	1.25		16
3	20	1.2	3												20	0.75	0.2													20	2		20
2.4	20	0.8	2.4												12	0.75	0.15													40	1		40
2.4	18	1.2	2.4												4	0.5	0.2													0.4	1		0.4
1.6	22	2.7	1.6												4	0.5	0.15													0.4	2		0.4
2	10	2	2												4	0.25	0.25													0.4	2		0.4
2	4	2.5	2												4	0.25	0.3													0.5	1.25		0.5
0.2	4	5	0.2												4	0.25	0.05													0.75	2		0.75
0.5	3	0.25	0.5												4	0.5	0.1													1.25	1		1.25
0.25	3	0.3	0.25												4	0.5	0.2													1	0.1		1
0.5	3	1	0.5												4	0.5	0.2													0.75	0.2		0.75
0.4	3	0.1	0.4												4	0.5	3													1	0.1		1
0.25	5	0.25	0.25												22	0.5	4													15	0.3		15
4	0.75	0.1	4												5	0.5	4													85	0.05		85
3	1.5	0.5	3												5	0.5	105													80	0.05		80
0.7	1.25	0.4	0.7												5	0.8	42													70	0.25		70
0.35	1.5	0.15	0.35												5	0.8	7													2	0.1		2
1	1.75	0.2	1												4	0.5	92													0.5	0.2		0.5
0.8	1.5	0.25	0.8												4	2	100													0.4	0.05		0.4
0.3	1.75	0.5	0.3												4	1.5	47.5													4	0.1		4
0.3	2	0.25	0.3												4	0.2	60													3.5	0.35		3.5
0.5	1.5	0.15	0.5												4	0.8	2.5													0.5	0.05		0.5
0.2	8	0.15	0.2												4	0.1	0.3													1	0.05		1
0.1	1	0.15	0.1												3	0.5	0.9													0.75	0.05		0.75
0.15	2.5	0.5	0.15												3	0.8	0.2													0.2	0.2		0.2
0.15	1	0.5	0.15												4	1.2	0.7													0.1	1.5		0.1
0.15	2.5	0.25	0.15												15	0.9	2.5													0.4	0.5		0.4
0.1	2	0.05	0.1												13	3	0.2													0.5	1		0.5
0.15	2	0.15	0.15												8	1.2	1.2													1	3		1
0.05	1.5	0.15	0.05												0.3	0.8	3.8													0.7	0.5		0.7
0.1	1.5	0.05	0.1												10	1.2	6													2.5	0.5		2.5
0.15	2	0.05	0.15												9	0.8	0.8													0.5	1		0.5
0.075	1	0.05	0.075												2.5	0.5	2													1	2		1
0.075	2.5	0.4	0.075												0.5	1.7	2.6													1	3		1
0.05	0.25	0.05	0.05												2	1	2													1.5	0.5		1.5
0.05	2.5	0.15	0.05												2	2.5	2.2													1.5	0.5		1.5
0.05	2.5	0.1	0.05												3	1.25	2.7													1.5	1.5		1.5
0.05	1.5	0.75	0.05												0.1	0.1														0.25	0.5		0.25
0.05	1	0.35	0.05												1.4	1.5														1	2		1
0.05	1.5	0.25	0.05												3	4.5														0.75	3		0.75
0.1	1.5	0.15	0.1												4	4.5														1	1		1
0.1	1	0.15	0.1												4	3														0.25	1.5		0.25
0.15	1	0.15	0.15												20	3														1.5	1.5		1.5
0.05	1.5	0.25	0.05												100	2														0.5	0.5		0.5
0.05	1.5	45	0.05												15	2														0.75	0.5		0.75
0.2	1.5	22	0.2												6	1.5														0.2	1		0.2
0.4	1.5	16	0.4												2	1														0.2	0.5		0.2
0.1	1.5	25	0.1												5	0.1														0.4	0.5		0.4
0.15	2	27.5	0.15												0.5	0.1														0.2	0.5		0.2
0.1	1	30	0.1												2	0.1														0.1	2		0.1
0.1	2	12.5	0.1												0.5	0.1														0.15	4		0.15
0.2	2	12.5	0.2												4	0.1														0.25	2		0.25
0.15	2	10	0.15												3.5	0.25														0.25	1		0.25
0.1	1	5	0.1												5	0.25														0.25	1		0.25
0.05	1	5	0.05												5	0.1														0.5	4		0.5
0.15	4	42	0.15												5	0.1														0.25	1		0.25
0.15	3	9	0.15												7.5	5.5														0.25	0.25		0.25
0.1	4	12.5	0.1												3	0.5														0.25	0.5		0.25
0.1	4	6	0.1												3	1														0.5	0.25		0.5
0.15	1	12.5	0.15												6	1														0.15	2.5		0.15
0.15	0.75	15	0.15												1.5	5														0.5	1		0.5
0.15	4	13	0.15												1.5	1														0.2	1.25		0.2
0.1	4	13	0.1												4.5	0.5														0.25	0.5		0.25
0.025	1	13	0.025												0.5	0.5														0.4	0.5		0.4
0.025	1	10	0.025												1	2														0.3	0.75		0.3
0.1	4	10	0.1												3	0.8														1	1.5		1
0.1	2	10	0.1												1	0.15															0.75
0.05	3	10	0.05												1.5	0.15															1.5
0.05	1	10	0.05												2	0.4															0.5
0.05	5	10	0.05												1.5	0.2															0.5
0.05	2	10	0.05												3	0.6															4
0.05	2	40	0.05												1	2.8															0.25
0.05	2	40	0.05												2	28															0.25
0.1	6	40	0.1												2.5	36															0.25
0.1	1	8	0.1												3	20															3
0.05	1	12.5	0.05												3	10															0.75
0.1	1	12.5	0.1												0.75	7															2
0.4	2	1	0.4												0.5	0.15															0.5
0.6	3	5	0.6												6	0.15															2
3.5	2	15	3.5												0.5	0.2															3
0.5	2	40	0.5												0.5	0.2															2.5
3	3	2.5	3												0.5	0.15															1.5
0.75	2	2.5	0.75												1	0.4															1.5
1.25	3	15	1.25												1	0.35															2.5
0.5	5	15	0.5												1.5	0.4															10
1.6	1	10	1.6												0.5	0.3															2
1.2	2	5	1.2												5.5	0.2															8
0.75	2	20	0.75												1	0.15															0.5
0.75	4	20	0.75												0.5	0.35															0.75
1.75	1	20	1.75												2.5	0.075															1
0.25	1	35	0.25												1	7															11
1	4	8	1												1.5	2															2
0.25	6	10	0.25												2	1.2															3
3	4	4	3												0.5	4.2															1
2.75	2	6	2.75												1.5	10															0.25
0.75	3	10	0.75												2	25															1.25
1.5	1	10	1.5												1.5	7															0.25
0.25	1	10	0.25												1.5	16															0.75
1	2	42	1												2	10															1.5
2.2	1.5	25	2.2												4.5	10															1.25
1	2	25	1												2	27															1.25
3.5	2	35	3.5												2	5															0.15
0.25	1.5	40	0.25												3	0.75															0.5
0.15	1	10	0.15												1	3															2.5
0.8	2	10	0.8												2	9															0.15
0.25	2	20	0.25												1.5	1															2
0.1	2	20	0.1												0.25	1															0.5
0.2	2	7.5	0.2												3	1.1															0.5
0.1	2	5	0.1												2	1.1															0.5
1.1	4	45	1.1												2	2.8															1
0.75	4	3	0.75												2	1.5															6
0.75	1	2	0.75												4	0.2															5
0.5	0.75	13	0.5												0.5	0.8															20
0.6	4	13	0.6												2	1															6
0.3	0.75	7	0.3												1.5	1															5
0.15	1	7	0.15												2	1															16
0.15	0.5	7	0.15												2	1															12.5
0.15	0.5	15	0.15												5	1.5															20
0.25	1	15	0.25												2	1															12.5
0.75	0.5	15	0.75												6	2															7
0.3	0.5	10	0.3												2	3															2.5
0.15	0.5	20	0.15												2	2.5															12.5
0.5	1	8	0.5												1	3															7
0.5	0.5	16	0.5												1.5	4															3
0.6	0.5	5	0.6												1.5	1															9
0.6	0.5	8	0.6												35	0.5															15
0.4	0.25	55	0.4												3	0.3															8
0.2	0.25	50	0.2												35	1.4															5
0.5	0.25	35	0.5												15	1.1															14
1	2	55	1												5	0.4															6
0.8	2	20	0.8												5	0.4															12.5
0.25	0.5	40	0.25												5	1															4
0.6	1	40	0.6												5	2.5															2.5
1.2	15	50	1.2												0.2	10															0.5
1.3	35	10	1.3												0.5	3															7.5
0.25	25	22.5	0.25												1.25	0.4															20
0.25	5	60	0.25												1.25	0.25															1.5
0.1	5	60	0.1												0.25	0.5															10
0.1	5	8	0.1												0.25	0.75															7
0.8	30	2.5	0.8												1.5	1															2.5
0.8	5	35	0.8												1.5	1.75															10
0.5	5	15	0.5												0.25	0.6															1
1.2	5	30	1.2												0.25	1.8															1
1.25	5	30	1.25												0.25	1.8															8
0.15	5	8	0.15												0.25	0.6															2
0.15	5	5	0.15												0.5	5															2
0.1	25	8	0.1												0.1	3															7
0.4	10	14	0.4												0.3	17															7
0.4	35	36	0.4												0.25	40															4
0.5	35	15	0.5												0.25	17.5															7
0.25	35	12.5	0.25												0.25	2															3
0.4	25	2.5	0.4												0.5	2															6
0.1	20	13	0.1												0.25	5															7
0.3	12	17	0.3												0.2	5															4
0.25	3	7.5	0.25												0.2	3															8
0.25	3	7.5	0.25												0.25	2															2
0.25	6	10	0.25												0.75	2															4
0.25	1.5	10	0.25												0.2	3															4.5
0.25	15	10	0.25												0.25	5															2
0.15	3	20	0.15												0.4	2															1
1.1	8	30	1.1												0.25	2															4
0.2	10	35	0.2												0.25	4															1
0.5	10	40	0.5												0.1	6															3
1	10	35	1												0.2	7.5															2
1.25	10	35	1.25												0.25	3															5
0.25	5	20	0.25												0.2	4															2
1.5	3	15	1.5												0.2	7															2
1.25	5	10	1.25												0.2	3.75															0.5
0.8	7	5	0.8												0.2	36.5															2
0.2	25	8	0.2												0.2	5															4
0.2	4.5	6	0.2												0.75	11.25															2
0.2	3.5	6	0.2												0.2	5															2
1	1.75	12	1												0.25	0.4															3
0.6	1.7	5.5	0.6												0.25	2															3
1	1.7	2	1												0.25	1.75															1
0.2	5	2	0.2												0.25	3.5															1
0.2	1	3	0.2												0.25	3.5															1
1.5	1	5	1.5												0.2	4															2
0.2	3	1.5	0.2												0.2	1.5															0.5
1	3	2.5	1												0.25	0.5															1.5
1.25	4	7.5	1.25												0.3	1															1
1.25	4	2.5	1.25												0.3	0.5															2
1	4	2.5	1												0.3	1															0.75
1	1.5	12.5	1												0.3	1															2.5
1	1	7.5	1												0.5	0.5															3
1.25	3	5	1.25												0.5	0.5															4
1.25	3	7.5	1.25												0.2	0.5															3
4.25	4	2.5	4.25												0.2	6															1.75
7	2	12.5	7												0.1	0.75															1
6	2	5	6												0.125	0.75															1.5
3.5	0.5	12.5	3.5												0.125	4															2
4	0.5	20	4												35	3															1.9
2.5	3	20	2.5												35	0.5															0.75
3	1.5	22.5	3												35	1															0.75
3	0.75	7.5	3												37	1.25															0.5
3	1	10	3												25	1.25															1.3
3	0.25	10	3												80	1.25															0.25
1.25	0.75	20	1.25												10	1.5															0.5
1	0.5	7.5	1												7	1.5															0.3
0.6	0.2	15	0.6												15	0.25															0.5
2	0.4	15	2												10	1.25															0.2
0.75	0.4	7.5	0.75												20	1															0.1
0.3	0.4	15	0.3												10	0.5															0.25
0.3	0.4	3	0.3												20	2															0.1
1.2	0.5	10	1.2												5	1															0.25
1	1.5	2.5	1												5	1															0.1
1.6	1.5	20	1.6												8	0.5															0.1
0.3	0.8	20	0.3												15	0.25															0.1
0.75	0.8	20	0.75													0.75															0.6
1.2	0.8	20	1.2													0.25															0.8
0.6	0.8	15	0.6													0.25															0.75
0.3	0.8	12.5	0.3													0.25															0.1
2.75	1	8	2.75													0.25															0.25
3	1	2	3													0.25															0.5
0.15	0.6	2.5	0.15													0.25															0.9
0.05	2.6	8	0.05													2															0.25
0.05	2.25	7.5	0.05													1															2
4	1	7.5	4													3															1.5
0.5	2.5	5	0.5													1.25															2
0.2	1.25	12.5	0.2													0.5															1
0.3	0.75	5	0.3													1.25															2
0.2	1.25	10	0.2													1															3.5
0.4	0.6	12.5	0.4													1.5															1
0.05	0.6	15	0.05													5															3
0.05	0.5	5	0.05													1															4
0.05	0.5	2.5	0.05													1															2
0.15	2	17.5	0.15													1															3
0.25	0.5	17.5	0.25													0.75															3
0.05	0.5	15	0.05													0.75															5
0.2	0.7	10	0.2													0.75															3.5
0.05	0.25	10	0.05													0.2															0.25
0.05	2	10	0.05													0.3															2.5
0.2	2	10	0.2													0.45															22.2
0.05	2	10	0.05													0.4															0.25
0.1	1	10	0.1													0.2															0.25
0.05	1	10	0.05													0.6															1.5
0.05	0.75	8	0.05													0.2															3
0.05	0.75	2	0.05													0.05															3
0.05	1.5	5	0.05													0.05															0.75
0.05	2	12.5	0.05													0.5															2
0.2	2	7.5	0.2													0.1															2
8	1.8	4	8													0.15															2
4	1.8	12	4													0.1															3
4	2	20	4													0.25															4.5
4	2	10	4													0.05															3
4	1.8	10	4													0.1															5
4	1.8	2	4													0.1															3.5
12	1.8	2	12													0.25															1.1
16	1.8	6	16													0.25															3.4
4	1.8	6	4													0.2															16.5
16	1.2	8	16													28															6
20	1.5	2.5	20													1															2.5
60	1.5	15	60													2															4
20	3	10	20													12															2.5
12	1	8	12													2															8
40	2	7	40													6															3.5
0.4	1.5	5	0.4													4															3.5
0.4	1.5	12.5	0.4													7															2.25
0.4	2.5	11	0.4													2															4.25
0.5	1.5	8	0.5													3															2
0.75	1.5	10	0.75													12															5
1.25	1.5	12.5	1.25													10															2
1	0.75	5	1													12															4
0.75	0.2	0.5	0.75													27															7.5
1	0.3	0.5	1													10															3
5	0.3	3.1	5													5															2
3	0.9	7	3													12
3	0.6	1	3													5
3	7.5	4.5	3													27
3	0.5	4.4	3													12
1	0.5	1.2	1													4
1	0.5	4.1	1													10
1	0.5	1.1	1													5
2	0.1	0.9	2													1
2	0.1	2.9	2													10
0.5	0.25	7.4	0.5													22
5	0.25	0.7	5													5
5	0.25	5.5	5													2.5
10	0.2	0.4	10													11
1	0.2	0.2	1													2
5	0.2	0.2	5													3.5
15	0.2		15													2.5
15	0.25		15													2
2	0.25		2													25
20	0.25		20													2
4	0.5		4													2
7	0.5		7													2
3	0.4		3													2
9.5	2		9.5													5
1	2		1													2
1	1.5		1													2
1	0.75		1													2
1	0.5		1													2
0.75	2		0.75													2
0.5	0.1		0.5													8
0.5	0.5		0.5													8
0.5	1.5		0.5													12
0.5	2.5		0.5													12
0.3	0.25		0.3													2
0.3	0.2		0.3													5
0.5	0.2		0.5													4
0.5	0.2		0.5													4
1.5	0.1		1.5													4
10	0.1		10													8
2	1		2													8
0.5	1		0.5													9
0.6	6.5		0.6													10
0.6	0.9		0.6													9
0.5	1.5		0.5													5
0.3	1.3		0.3													2
0.3	0.5		0.3													1
0.4	0.75		0.4													2
0.5	0.25		0.5													2
1.5	2		1.5													0.5
2	0.5		2													1
1.5	0.2		1.5													8
0.5	0.2		0.5													3
0.5	0.5		0.5													1.5
0.6	0.2		0.6													0.5
0.6	1.2		0.6													1
0.5	2		0.5													1
0.3	2		0.3													0.5
0.3	0.2		0.3													1
12	1.5		12													0.5
2	1		2													1
3	1.5		3													0.5
0.75	2		0.75													0.5
9	2		9													1.5
0.5	1.5		0.5													1.5
2	2		2													1
2	0.75		2													1
11	0.75		11													2
5	4		5													3
2	4		2													5
2	2		2													1.5
1	3		1													1.5
5	2		5													0.5
3	10		3													1
2	1		2													4
2	7		2													1.5
2	1.5		2													6
3.5	2		3.5													1.5
6	4		6													1.5
1.2	0.5		1.2													13
4.5	2		4.5													1
2	0.5		2													2
1.2	0.5		1.2													5.5
2	2.25		2													1
2	1		2													4
0.5	4.75		0.5													4
2	2.5		2													5
4	1.4		4													2.5
4	2.75		4													0.25
3	2		3													0.5
3	1		3													0.5
2	0.2		2													0.5
2	0.1		2													0.2
0.1	1.5		0.1													0.2
0.1	1		0.1													0.2
0.1	0.1		0.1													0.2
2	10.5		2													0.75
0.5	10		0.5													1
0.4	0.45		0.4													0.25
4	1		4													0.25
3.5	1.25		3.5													0.25
0.5	0.25		0.5													0.25
15	0.25		15													0.5
85	0.25		85													0.25
80	0.75		80													0.25
70	2		70													0.2
3	0.3		3													1
2.2	0.4		2.2													0.3
3	0.15		3													0.2
2.5	0.25		2.5													1.5
1.5	0.2		1.5													2.5
1.5	0.2		1.5													1
1.1	2		1.1													0.25
1.1	2		1.1													0.25
1.5	1.5		1.5													0.25
2.25	3.5		2.25													0.25
1	2		1													0.25
2	1.8		2													0.25
1.8	0.6		1.8													0.3
1.8	1.2		1.8													0.3
0.5	0.2		0.5													0.5
0.5	0.1		0.5													0.5
1	0.1		1													0.25
1.5	0.2		1.5													0.6
1.25	0.1		1.25													0.6
0.25	0.2		0.25													0.25
0.75	0.25		0.75													0.25
0.75	0.15		0.75													1
0.4	0.05		0.4													0.3
0.7	0.05		0.7													0.25
0.5	0.1		0.5													4.5
0.6	0.2		0.6													9
0.5	0.15		0.5													0.75
1	0.01		1													1.5
1	0.04		1													1
1.25	0.2		1.25													0.5
0.5	0.2		0.5													0.5
0.5	0.075		0.5													0.5
1	0.05		1													2.25
1	0.3		1													2.25
1	0.1		1													1.5
1	0.6		1													0.375
1	0.15		1													0.375
0.8	0.9		0.8													0.375
1	0.15		1													0.375
0.7	0.15		0.7													0.15
1.1	2		1.1													0.375
0.2	1		0.2													1.5
1	12		1													1.5
0.5	7		0.5													1
1.4	6		1.4													0.5
1	2		1													3
0.5	1		0.5													1.5
0.2	3.8		0.2													1
1	5		1													0.25
0.75	10		0.75													0.5
0.2	5		0.2													1.8
0.1	7.5		0.1													0.1
0.4	5		0.4													0.1
0.5	3		0.5													0.1
1	8		1													0.1
0.7	3.25		0.7													1
2.5	0.5		2.5													0.1
0.5	0.5		0.5													0.1
1	0.7		1													0.1
2	1		2													0.9
1.5	0.85		1.5													25
2	2.4		2													2.5
2	1.6		2													2
2	1		2													1
3	0.9		3													5
3	0.1		3													4
2.5	1		2.5													2
4	1.6		4													0.5
4	0.4		4													1
3	1		3													10
2.5	1.2		2.5													17.5
2.5	2.1		2.5													25
3	0.3		3													7.5
2	0.2		2													3.5
2	0.5		2													3.5
3	0.2		3													1
3	0.4		3													0.5
2	0.4		2													0.5
2.5	0.2		2.5													3
2.5	0.3		2.5													3
2.5	0.9		2.5													8
2.5	1.25		2.5													3
2.5	1.25		2.5													2
2	0.2		2													3
2	1		2													4
2	0.3		2													1
2	0.6		2													3
10	1		10													2
175	1		175													1.5
200	1.5		200													3
5.5	1		5.5													1
5.5	2.5		5.5													2
5	3		5													3
3.5	2		3.5													1
4	0.6		4													3
7	0.3		7													5
7	1.9		7													1
4	1.1		4													0.5
4	1.75		4													0.5
6	3		6													44
4.5	1.52		4.5													10
4.5	4.57		4.5													20
1	0.6		1													10
2	0.6		2													15
3	0.4		3													10
1	0.9		1													1
2	1.5		2													1
5	0.6		5													2
5	0.6		5													20
2	1.7		2													1
2	0.6		2													2.5
1.5	3.3		1.5													5
1.5	1.5		1.5													5
2	0.3		2													2.5
3.5	0.3		3.5													11
1	0.3		1													12
3	0.3		3													5
1.5	0.3		1.5													5
3	0.76		3													2.5
1	0.76		1													10
2.5	0.91		2.5													5
1.5	15		1.5													5
1.5	3		1.5													2.5
2	7		2													2.5
2	3		2													2.5
2	8		2													3
4	30		4													3
3	7.5		3													4.5
4	34.5		4													4.5
3	4		3													2.5
4	20		4													2.5
2	10		2													10
2	28.75		2													1
2	30		2													10
2	4		2													0.5
3	4		3													2.5
4	5		4													2
3	5		3													2
2	5		2													1
2	1.2		2													2
2	2.6		2													7
2	2		2													1
1	0.8		1													1
2	0.8		2													4
2	1.6		2													1
1	2.8		1													7
1.5	0.25		1.5													3
1.5	0.25		1.5													5
1.5	0.25		1.5													7
1.5	1.6		1.5													2.5
1	1.6		1													3
1.5	0.6		1.5													2.5
1.5	1.2		1.5													0.5
2	34.5		2													2.5
1.5	34.5		1.5													2.5
1.5	35		1.5													7.5
1.5	20		1.5													1
1.5	15		1.5													2.5
0.6	5		0.6													2.5
0.4	5		0.4													2.5
1	5		1													0.5
1	6.25		1													1.25
1.5	2		1.5													2
1.5	1.75		1.5													0.35
0.5	1.75		0.5													0.8
0.5	15		0.5													0.6
1	4.5		1													2.5
1	15		1													1
1	3.5		1													0.5
1.5	4		1.5													0.5
1.5	5		1.5													0.5
2	7		2													0.5
3	7		3													0.5
4.5	2		4.5													0.5
4	1.75		4													0.5
3.5	1.75		3.5													0.5
3	1		3													0.25
2	25		2													1.75
3	3		3													0.3
0.5	8		0.5													0.25
0.75	3		0.75													0.25
0.25	2		0.25													0.5
0.5	2		0.5													0.8
1	1		1													0.5
1	2		1													0.25
1.5	15		1.5													0.7
1.5	15		1.5													0.2
1.5	3		1.5													0.5
0.25	7		0.25													0.25
1	3		1													0.5
0.75	3		0.75													0.2
1	5		1													0.1
0.25	2		0.25													0.1
1.5	5		1.5													0.25
0.5	1.5		0.5													0.4
0.75	7.5		0.75													0.5
14	7.5		14													2
14	12.5		14													0.5
0.2	15		0.2													3.5
0.2	15		0.2													0.5
0.4	20		0.4													3.75
0.2	4		0.2													0.5
0.1	20		0.1													0.3
0.15	4		0.15													0.3
0.25	22		0.25													0.3
0.25	26		0.25													0.05
0.25	29		0.25													0.25
0.5	30		0.5													0.15
0.25	11		0.25													0.05
0.25	6		0.25													0.4
0.25	8		0.25													0.35
0.5	10		0.5													0.05
0.15	12		0.15													0.9
0.5	20		0.5													0.25
0.2	5		0.2													0.5
0.25	12		0.25													0.25
0.4	7.5		0.4													0.25
0.3	7.5		0.3													0.25
1	12		1													1.75
	12															0.1
	7.5															0.1
	3.75															0.1
	3.75															0.1
	3.75															0.2
	8.75															0.1
	14															0.25
	14.75															0.2
	16															0.2
	14															0.2
	2.5															0.2
	4															0.3
	3.5															0.1
	3															0.1
	6															0.15
	5															0.5
	7															0.15
	10															0.15
	33															0.15
	21															0.15
	9															0.15
	2.8															0.15
	3															0.5
	3															0.2
	3															0.3
	4															1
	3															1
	8															1
	1.5															0.5
	0.5															0.2
	1															1.5
	1.5															1
	3.5															0.4
	0.5															0.4
	4															0.4
	1.5															0.45
	3.75															0.5
	5.5															0.1
	3.5															0.3
	3.75															0.25
	1.4															1.5
	1.4															9
	1.5															0.5
	1.5															3
	1															3
	1.25															4
	1.75															5
	1															5
	1															5
	1															8
	1.5															0.25
	1															2.5
	2															7
	4															3
	6															0.5
	5															5
	6															5
	3															7
	6															4
	3															4
	6															10
	2															9.5
	7															10
	3															10
	3															4
	1															2.5
	15															4
	2															4
	5.5															0.25
	4.5															0.25
	3															4
	2															2.5
	2															3
	2															3
	1															3
	1															6
	1															3
	1.5															2
	1.25															2
	1.25															5
	1															3
	2															8
	1															8
	1															0.25
	2															0.75
	2															2.25
	1.25															2.5
	2															2.5
	1															2.5
	1															1.5
	3															3
	5															2
	5															1.5
	4															1.5
	3															1
	5															0.25
	5															1.5
	3															2
	3															2
	4															7
	4															2.5
	4															2
	3															2
	3															0.5
	3															0.5
	3															2
	12															2.5
	3															5
	3															1.1
	4															0.75
	12															2.2
	0.4															1.2
	0.55															0.8
	0.4															0.1
	0.25															0.9
	0.2															0.6
	0.25															2
	0.1															2.6
	0.05															25
	0.15															10.5
	0.1															12
	0.15															2.25
	0.1															2.5
	0.2															1.25
	0.15															1.5
	0.1															3
	0.1															2.5
	0.15															3.5
	0.5															1.5
	0.5															1.5
	0.25															6
	0.05															4
	0.05															3.5
	0.1															3
	0.2															4
	0.1															3
	0.3															15
	0.05															1.25
	0.05															3.25
	0.25															4
	0.1															1.25
	0.2															0.75
	0.05															0.25
	0.1															9
	0.35															1.5
	0.05															1
	0.05															1.5
	0.05															1
	0.2															6
	20															1
	18															4
	10															2
	12															3
	10															3
	15															1
	9															2
	12															1.5
	10															1
	4															2
	14															2
	3															0.5
	2															1
	2															1
	4															1
	2															1
	2															1
	2															1.5
	2															4.5
	2															2
	2															4
	1															2
	0.5															2.5
	0.5															0.25
	1															0.25
	3															0.25
	1															1
	1															1
	1															0.5
	0.5															5
	2															0.5
	1															0.5
	3															1
	4															2.5
	0.5															2.5
	0.5															1
	1															0.25
	0.5															0.25
	0.5															0.25
	1.5															0.25
	0.5															0.25
	1															0.25
	3															0.5
	0.5															1
	0.5															0.75
	1															0.8
	2															1
	3
	0.5
	0.5
	1.5
	0.5
	2
	3
	1
	1.5
	1.5
	0.5
	0.5
	1
	0.5
	0.5
	0.5
	5
	5
	1.5
	1.5
	4
	12
	2
	4
	2
	7
	1
	2
	11
	3.5
	3.5
	1.5
	1.5
	4
	2
	2
	2
	4
	2
	1
	1
	4
	1
	1
	1.5
	1
	0.3
	0.3
	0.4
	0.3
	0.5
	0.5
	0.5
	0.5
	0.5
	0.5
	0.25
	0.25
	0.5
	0.25
	2.5
	1
	1.25
	0.5
	0.5
	0.75
	1.5
	0.75
	1.5
	0.5
	0.5
	4
	0.25
	0.25
	0.25
	8
	12
	10
	26
	6
	6
	2.5
	2
	1
	3
	0.75
	10
	10
	1
	2.5
	2
	1.5
	7.5
	7
	9
	1
	0.75
	4
	12
	1
	5
	0.75
	2.5
	0.75
	1
	0.75
	12
	0.25
	2.5
	5
	5
	2.5
	2.5
	10
	3
	0.5
	2.5
	5
	1
	3
	0.75
	2
	0.5
	2
	3
	2.5
	1.5
	1.5
	2.5
	10
	2
	8
	0.5
	0.75
	1
	11
	2
	3
	1
	0.25
	1.25
	0.25
	0.75
	1.5
	1.25
	1.25
	0.15
	0.5
	2.5
	0.15
	2
	0.5
	0.5
	0.5
	1
	6
	5
	20
	6
	5
	16
	12.5
	20
	12.5
	7
	2.5
	12.5
	7
	3
	9
	15
	8
	5
	14
	6
	12.5
	4
	2.5
	0.5
	7.5
	20
	1.5
	10
	7
	2.5
	10
	1
	1
	8
	2
	2
	7
	7
	4
	7
	3
	6
	7
	4
	8
	2
	4
	4.5
	2
	1
	4
	1
	3
	2
	5
	2
	2
	0.5
	2
	4
	2
	2
	3
	3
	1
	1
	0.5
	0.5
	1
	2
	2
	1
	2
	0.75
	2
	20
	0.45
	0.45
	0.35
	0.35
	0.25
	0.25
	0.1
	0.25
	0.25
	0.25
	0.25
	8
	2
	10
	15
	10
	1.25
	1
	0.8
	1
	0.25
	0.6
	0.25
	0.25
	1.5
	1
	0.5
	0.5
	1
	0.5
	0.5
	1.25
	1
	2.25
	1
	1
	0.35
	0.4
	2.25
	1.75
	2
	2
	4.5
	5.5
	10
	1.25
	9
	7.5
	3.5
	1.5
	1.5
	0.5
	0.1
	0.1
	0.1
	15
	12.5
	5
	6
	3
	0.25
	1
	0.4
	1.25
	0.8
	0.3
	0.15
	1.25
	1.25
	2.5
	1
	2
	0.5
	1.5
	1
	2
	0.75
	2.5
	3
	4
	3
	1.75
	1
	1.5
	2
	1
	0.6
	0.4
	0.4
	0.5
	0.5
	0.25
	0.4
	0.2
	0.2
	0.4
	0.7
	1.9
	0.75
	0.75
	0.5
	1.3
	0.25
	0.5
	0.3
	0.5
	0.2
	0.1
	0.25
	0.1
	0.25
	0.1
	0.1
	0.1
	0.6
	0.8
	0.75
	0.1
	0.25
	0.5
	0.9
	0.25
	3
	6
	4.5
	3
	5.5
	5
	5
	2.5
	2.5
	2.5
	4
	3
	5.5
	7
	3
	3
	3.75
	2
	1.5
	2
	1
	2
	3.5
	1
	3
	4
	2
	3
	3
	5
	3.5
	0.25
	2.5
	22.2
	0.25
	0.25
	1.5
	3
	3
	0.75
	2
	11
	1.5
	3
	1.5
	3
	6
	2.5
	2.5
	2.5
	5
	1
	5
	0.55
	2.45
	3
	2.5
	2
	9
	0.5
	1
	1.5
	3
	0.7
	0.7
	0.7
	2.4
	2
	2.25
	0.25
	2.25
	1.75
	3.75
	1.5
	1.5
	1.5
	2.5
	3
	0.75
	2
	2
	3
	4.5
	3
	5
	3.5
	1.1
	3.4
	16.5
	6
	2.5
	4
	2.5
	8
	3.5
	3.5
	2.25
	4.25
	2
	5
	2
	4
	7.5
	3
	2

## Sheet: Figure 5
	DUNE-SET THICKNESS	RANK SUBSIDENCE	RANK DUNE-SET THICKNESS									SUBSIDENCE	DUNE-SET LENGTH	SUBSIDENCE RANK	RANK DUNE-SET LENGTHRANK						DUNE-SET THICKNESS													DUNE-SET LENGTH
2.3	0.6	1654	1437.5			SPEARMAN	0.258922					2.3	8	648	584.5		SPEARMAN	0.353917			Group 1	Group 2	Group 3											Group 1	Group 2	Group 3	Group1
2.3	1.5	1654	1076.5			PEARSON	0.239994					2.3	9	648	577		PEARSON	0.12954			0.6	10	1.5		Anova: Single Factor									8	15	10	8		Anova: Single Factor
2.3	1.5	1654	1076.5				13.4858					2.3	9	648	577			3.32557			1.5	8	1											9	15	10	9
2.3	1.5	1654	1076.5			PEARSON P VALUE	2.06577e-39					2.3	10	648	564.5		PEARSON P VALUE	0.000932182			1.5	10	0.5		SUMMARY									9	22	10	9		SUMMARY
2.3	0.3	1654	1580			SPEARMAN P-VALUE	6.75589e-27					2.3	10	648	564.5		SPEARMAN P-VALUE	3.75336e-20			1.5	15	0.75		Groups	Count	Sum	Average	Variance					10	25	10	10		Groups	Count	Sum	Average	Variance
2.3	0.3	1654	1580									2.3	12	648	548						0.3	15	0.75		Group 1	402	839.6	2.08856	4.58609					10	25	20	10		Group 1	91	4280.25	47.0357	3757.41
2.3	0.9	1654	1346									2.3	12	648	548						0.3	17	0.5		Group 2	916	4183.54	4.56718	34.8062					12	28	25	12		Group 2	382	58470.9	153.065	93249.5
2.3	0.6	1654	1437.5									2.4	0.5	630.5	650						0.9	7.5	0.5		Group 3	346	3341.55	9.65766	135.643					12	30	25	12		Group 3	178	41444	232.831	151688
2.3	0.9	1654	1346									2.4	0.5	630.5	650						0.6	7.5	0.25											0.5	30	30	0.5
2.3	0.6	1654	1437.5									2.4	0.5	630.5	650						0.9	15	0.25											0.5	30	35	0.5
2.3	0.9	1654	1346									2.4	1	630.5	647						0.6	2.5	0.25		ANOVA									0.5	35	40	0.5		ANOVA
2.3	0.6	1654	1437.5									2.4	1	630.5	647						0.9	2	0.2		Source of Variation	SS	df	MS	F	P-value	F crit			1	35	40	1		Source of Variation	SS	df	MS	F	P-value	F crit
2.3	0.4	1654	1551.5									2.4	1.5	630.5	645						0.6	4	4		Between Groups	11084	2	5542	114.374	2.90676e-47	3.00114			1	35	40	1		Between Groups	2.1238e+06	2	1.0619e+06	10.972	2.05976e-05	3.00962
2.3	0.8	1654	1361.5									2.4	2	630.5	640						0.4	2	0.6		Within Groups	80483.6	1661	48.4549						1.5	40	40	1.5		Within Groups	6.27151e+07	648	96782.5
2.3	0.9	1654	1346									2.4	2	630.5	640						0.8	5	1											2	40	40	2
2.3	0.9	1654	1346									2.4	2	630.5	640						0.9	3	1		Total	91567.6	1663							2	40	45	2		Total	6.48389e+07	650
2.3	0.8	1654	1361.5									2.4	2	630.5	640						0.9	2.5	1											2	40	45	2
2.3	1.2	1654	1161									2.4	2	630.5	640						0.8	3	0.6		t-Test: Two-Sample Assuming Equal Variances									2	40	49	2		t-Test: Two-Sample Assuming Equal Variances
2.3	0.9	1654	1346									2.4	2	630.5	640						1.2	8	1.5											2	45	50	2
2.3	1.2	1654	1161									2.4	2	630.5	640						0.9	10	2			Group 1	Group 2		Bonferroni correction		9.27889e-16			2	45	50	2			Group 1	Group 2		bonferroni correction		0.00159353
2.3	1.2	1654	1161									2.4	2.5	630.5	634						1.2	2.5	4		Mean	2.08856	4.56718							2	47	50	2		Mean	47.0357	153.065
2.4	2	1604.5	904.5									2.4	3	630.5	630.5						1.2	3	1.5		Variance	4.58609	34.8062							2.5	50	50	2.5		Variance	3757.41	93249.5
2.4	2.75	1604.5	738.5									2.4	3	630.5	630.5						2	5	1		Observations	402	916							3	50	50	3		Observations	91	382
2.4	4	1604.5	544.5									2.4	3.5	630.5	627.5						2.75	2	1.2		Pooled Variance	25.5978								3	50	50	3		Pooled Variance	76149.1
2.4	1	1604.5	1261.5									2.4	4	630.5	619						4	5	2.2		Hypothesized Mean Difference	0								3.5	50	55	3.5		Hypothesized Mean Difference	0
2.4	8	1604.5	300									2.4	4	630.5	619						1	5	0.75		df	1316								4	50	55	4		df	471
2.4	10	1604.5	239.5									2.4	4	630.5	619						8	5	0.75		t Stat	-8.18865								4	50	60	4		t Stat	-3.29394
2.4	2	1604.5	904.5									2.4	4	630.5	619						10	5	0.75		P(T<=t) one-tail	3.09296e-16								4	55	60	4		P(T<=t) one-tail	0.000531176
2.4	2	1604.5	904.5									2.4	4	630.5	619						2	5	1.5		t Critical one-tail	1.64601								4	55	60	4		t Critical one-tail	1.6481
2.4	2	1604.5	904.5									2.4	4	630.5	619						2	2	1.2		P(T<=t) two-tail	6.18592e-16								4	55	60	4		P(T<=t) two-tail	0.00106235
2.4	2	1604.5	904.5									2.4	4	630.5	619						2	2	0.2		t Critical two-tail	1.96177								4	55	60	4		t Critical two-tail	1.96501
2.4	2	1604.5	904.5									2.4	4	630.5	619						2	7.5	0.2											4	55	60	4
2.4	2	1604.5	904.5									2.4	17	630.5	520						2	2.5	0.2		t-Test: Two-Sample Assuming Equal Variances									4	55	60	4		t-Test: Two-Sample Assuming Equal Variances
2.4	2	1604.5	904.5									2.4	17	630.5	520						2	7.5	1.5											17	55	60	17
2.4	1.5	1604.5	1076.5									2.4	17	630.5	520						2	5	0.3			Group 2	Group 3							17	60	65	17			Group 2	Group 3		bonferroni correction		0.0132038
2.4	1.5	1604.5	1076.5									2.8	5	611	603.5						1.5	10	0.3		Mean	4.56718	9.65766		Bonferroni correction		2.13647e-23			17	60	65	17		Mean	153.065	232.831
2.4	1.5	1604.5	1076.5									2.8	8.5	611	582						1.5	12	1.5		Variance	34.8062	135.643							5	60	70	5		Variance	93249.5	151688
2.4	1	1604.5	1261.5									2.8	9	611	577						1.5	5	0.25		Observations	916	346							8.5	60	70	8.5		Observations	382	178
2.4	1	1604.5	1261.5									2.8	11.75	611	554						1	0.5	1		Pooled Variance	62.4163								9	60	70	9		Pooled Variance	111787
2.4	1.1	1604.5	1176									2.8	12	611	548						1	1.5	1		Hypothesized Mean Difference	0								11.75	67	70	11.75		Hypothesized Mean Difference	0
2.4	1.1	1604.5	1176									2.8	15	611	531						1.1	5	0.3		df	1260								12	67	70	12		df	558
2.4	1	1604.5	1261.5									2.8	20	611	512.5						1.1	15	1.25		t Stat	-10.2109								15	67	70	15		t Stat	-2.62889
2.4	1	1604.5	1261.5									2.8	22	611	507						1	1	4.5		P(T<=t) one-tail	7.12156e-24								20	67	70	20		P(T<=t) one-tail	0.00440126
2.4	1.3	1604.5	1130									2.8	32	611	461.5						1	4	0.3		t Critical one-tail	1.64606								22	70	70	22		t Critical one-tail	1.64759
2.4	1.1	1604.5	1176									2.8	36	611	451						1.3	3	0.8		P(T<=t) two-tail	1.42431e-23								32	75	75	32		P(T<=t) two-tail	0.00880252
2.4	1.1	1604.5	1176									2.8	96	611	267						1.1	2	0.2		t Critical two-tail	1.96185								36	75	75	36		t Critical two-tail	1.96422
2.4	1.1	1604.5	1176									5.6	6	598.5	591						1.1	2	1.5											96	80	75	96
2.4	1.1	1604.5	1176									5.6	6	598.5	591						1.1	3	0.5		t-Test: Two-Sample Assuming Equal Variances									6	100	80	6		t-Test: Two-Sample Assuming Equal Variances
2.4	1	1604.5	1261.5									5.6	8	598.5	584.5						1.1	10	0.4											6	105	80	6
2.4	1.5	1604.5	1076.5									5.6	8	598.5	584.5						1	1	0.2			Group 3	Group 1							8	110	80	8			Group 3	Group1		bonferroni correction		1.40623e-05
2.4	0.75	1604.5	1392.5									5.6	10	598.5	564.5						1.5	15	0.4		Mean	9.65766	2.08856		Bonferroni correction		8.44005e-34			8	6	80	8		Mean	232.831	47.0357
2.4	3	1604.5	671.5									5.6	11	598.5	556						0.75	15	0.5		Variance	135.643	4.58609							10	16	80	10		Variance	151688	3757.41
2.4	0.5	1604.5	1494									5.6	12	598.5	548						3	6	0.8		Observations	346	402							11	16	80	11		Observations	178	91
2.4	0.75	1604.5	1392.5									5.6	14	598.5	537						0.5	7	1.5		Pooled Variance	65.1955								12	24	80	12		Pooled Variance	101824
2.4	1	1604.5	1261.5									5.6	14	598.5	537						0.75	2.5	0.8		Hypothesized Mean Difference	0								14	29	80	14		Hypothesized Mean Difference	0
2.4	1	1604.5	1261.5									5.6	14	598.5	537						1	12	1		df	746								14	60	80	14		df	267
2.4	1	1604.5	1261.5									5.6	14	598.5	537						1	3	2		t Stat	12.7831								14	76	80	14		t Stat	4.5182
2.4	1	1604.5	1261.5									5.6	20	598.5	512.5						1	9	0.8		P(T<=t) one-tail	2.81335e-34								14	20	80	14		P(T<=t) one-tail	4.68744e-06
2.4	1	1604.5	1261.5									5.6	20	598.5	512.5						1	1	0.3		t Critical one-tail	1.6469								20	30	85	20		t Critical one-tail	1.65058
2.4	1	1604.5	1261.5									5.6	22.5	598.5	505						1	16	0.5		P(T<=t) two-tail	5.6267e-34								20	30	90	20		P(T<=t) two-tail	9.37487e-06
2.4	0.5	1604.5	1494									8.3	20	577	512.5						1	4	1.2		t Critical two-tail	1.96315								22.5	30	90	22.5		t Critical two-tail	1.96889
2.4	1	1604.5	1261.5									8.3	37.5	577	450						0.5	9	1.75											20	40	90	20
2.4	0.5	1604.5	1494									8.3	38	577	448.5						1	5	1											37.5	40	95	37.5
2.4	0.4	1604.5	1551.5									8.3	38	577	448.5						0.5	6.5	0.25		Group 1 median		1.5							38	40	95	38		Group 1 median	14
2.4	1.25	1604.5	1141.5									8.3	50	577	395						0.4	7	0.25		Group 2 median		2.5							38	40	100	38		Group 2 median	60
2.4	0.75	1604.5	1392.5									8.3	50	577	395						1.25	3	0.25		Group 3 median		6							50	40	100	50		Group 3 median	120
2.4	0.75	1604.5	1392.5									8.3	50	577	395						0.75	9	0.25											50	40	100	50
2.4	1.1	1604.5	1176									8.3	80	577	303						0.75	3	0.5		Group 1 St.Dev		2.14152							50	40	100	50		Group 1 St.Dev	61.2977
2.4	0.9	1604.5	1346									8.3	90	577	280						1.1	2.5	0.5		Group 2 St.Dev		5.89968							80	40	100	80		Group 2 St.Dev	305.368
2.4	0.75	1604.5	1392.5									8.3	95	577	270						0.9	5	0.2		Group 3 St.Dev		11.6466							90	40	100	90		Group 3 St.Dev	389.472
2.4	1.1	1604.5	1176									8.3	95	577	270						0.75	7	0.5											95	40	100	95
2.4	0.5	1604.5	1494									8.3	95	577	270						1.1	2	0.3											95	40	100	95
2.4	2	1604.5	904.5									8.3	100	577	250						0.5	3	0.3											95	50	100	95
2.4	0.5	1604.5	1494									8.3	100	577	250						2	4	0.5											100	50	100	100
2.4	0.4	1604.5	1551.5									8.3	100	577	250						0.5	2	0.5											100	60	100	100
2.4	1	1604.5	1261.5									8.3	115	577	225						0.4	2	1.2											100	60	100	100
2.4	0.6	1604.5	1437.5									8.3	148	577	178.5						1	4	0.25											115	60	100	115
2.4	1.25	1604.5	1141.5									8.3	148	577	178.5						0.6	20	0.25											148	60	105	148
2.4	1.75	1604.5	1009.5									8.3	150	577	173.5						1.25	20	1											148	70	110	148
2.4	0.75	1604.5	1392.5									8.3	150	577	173.5						1.75	20	0.75											150	70	110	150
2.4	3	1604.5	671.5									8.3	150	577	173.5						0.75	20	0.75											150	80	115	150
2.4	1.4	1604.5	1128									8.3	150	577	173.5						3	20	0.25											150	80	115	150
2.4	0.4	1604.5	1551.5									8.3	160	577	162						1.4	20	0.75											150	80	120	150
2.4	3	1604.5	671.5									8.3	160	577	162						0.4	18	0.25											160	80	120	160
2.4	1	1604.5	1261.5									8.3	170	577	150						3	22	0.25											160	80	120	160
2.4	0.5	1604.5	1494									8.3	170	577	150						1	10	2.5											170	80	120	170
2.4	1	1604.5	1261.5									8.3	185	577	135						0.5	4	3.5											170	90	120	170
2.4	1	1604.5	1261.5									8.3	185	577	135						1	4	2.5											185	90	120	185
2.4	1.5	1604.5	1076.5									8.3	250	577	102.5						1	3	1											185	90	120	185
2.4	0.75	1604.5	1392.5									9.4	160	561.5	162						1.5	3	1.5											250	90	120	250
2.4	1	1604.5	1261.5									9.4	160	561.5	162						0.75	3	1.1											160	100	120	160
2.4	3	1604.5	671.5									10.9	15	536	531						1	3	0.9											160	100	120	160
2.4	2	1604.5	904.5									10.9	15	536	531						3	5	1.5												100	130
2.4	3	1604.5	671.5									10.9	22	536	507						2	0.75	1												100	130
2.4	2.4	1604.5	805.5									10.9	25	536	497						3	1.5	3												100	130
2.4	2.4	1604.5	805.5									10.9	25	536	497						2.4	1.25	0.75												100	130
2.4	1.6	1604.5	1022.5									10.9	28	536	478						2.4	1.5	0.75												100	135
2.4	2	1604.5	904.5									10.9	30	536	468.5						1.6	1.75	0.15												100	135
2.4	2	1604.5	904.5									10.9	30	536	468.5						2	1.5	0.25												100	135
2.6	0.7	1562	1419.5									10.9	30	536	468.5						2	1.75	0.15												100	140
2.6	0.35	1562	1566.5									10.9	35	536	455						0.7	2	0.4												100	140
2.6	1	1562	1261.5									10.9	35	536	455						0.35	1.5	0.5												100	140
2.6	0.8	1562	1361.5									10.9	35	536	455						1	8	0.5												100	140
2.6	0.3	1562	1580									10.9	40	536	434						0.8	1	0.75												110	140
2.6	0.3	1562	1580									10.9	40	536	434						0.3	2.5	0.15												120	140
2.6	0.5	1562	1494									10.9	40	536	434						0.3	1	2												120	145
2.7	0.4	1548.5	1551.5									10.9	40	536	434						0.5	2.5	1.2												120	150
2.7	0.6	1548.5	1437.5									10.9	40	536	434						0.4	2	0.8												130	150
2.7	3.5	1548.5	596.5									10.9	45	536	411						0.6	2	1.2												160	150
2.7	0.5	1548.5	1494									10.9	45	536	411						3.5	1.5	2.7												160	160
2.7	3	1548.5	671.5									10.9	47	536	408						0.5	1.5	2												160	160
2.7	0.75	1548.5	1392.5									10.9	50	536	395						3	2	2.5												160	170
2.7	1.25	1548.5	1141.5									10.9	50	536	395						0.75	1	5												160	170
2.7	0.5	1548.5	1494									10.9	50	536	395						1.25	2.5	0.25												160	185
2.7	1.6	1548.5	1022.5									10.9	50	536	395						0.5	0.25	0.3												160	190
2.7	1.2	1548.5	1161									10.9	50	536	395						1.6	2.5	45												160	190
2.7	0.75	1548.5	1392.5									10.9	50	536	395						1.2	2.5	22												210	190
2.7	0.75	1548.5	1392.5									10.9	55	536	378						0.75	1.5	16												230	190
2.7	1.75	1548.5	1009.5									10.9	55	536	378						0.75	1	25												240	190
2.7	0.25	1548.5	1615									10.9	55	536	378						1.75	1.5	27.5												260	200
2.7	1	1548.5	1261.5									10.9	55	536	378						0.25	2	30												280	200
2.7	0.25	1548.5	1615									10.9	55	536	378						1	1	12.5												15	200
2.7	3	1548.5	671.5									10.9	55	536	378						0.25	2	12.5												15	200
2.7	2.75	1548.5	738.5									10.9	55	536	378						3	2	10												18	210
2.7	0.75	1548.5	1392.5									10.9	60	536	360						2.75	2	5												25	220
2.7	1.5	1548.5	1076.5									10.9	60	536	360						0.75	1	5												30	220
2.8	1.25	1529	1141.5									10.9	60	536	360						1.5	1	42												32	220
2.8	1.25	1529	1141.5									10.9	60	536	360						1.25	4	9												45	235
2.8	1	1529	1261.5									10.9	60	536	360						1.25	3	12.5												50	240
2.8	1	1529	1261.5									10.9	67	536	339.5						1	4	6												55	240
2.8	1	1529	1261.5									10.9	67	536	339.5						1	4	12.5												55	260
2.8	1.25	1529	1141.5									10.9	67	536	339.5						1	1	15												65	260
2.8	1.25	1529	1141.5									10.9	67	536	339.5						1.25	0.75	13												75	260
2.8	4.25	1529	507									10.9	70	536	331.5						1.25	4	13												75	260
2.8	7	1529	354.5									10.9	75	536	320						4.25	4	13												75	265
2.8	6	1529	384.5									10.9	75	536	320						7	1	10												75	270
2.8	3.5	1529	596.5									10.9	80	536	303						6	1	10												75	270
2.8	4	1529	544.5									10.9	100	536	250						3.5	4	10												85	280
2.8	2.5	1529	772.5									10.9	105	536	232.5						4	2	10												85	280
2.8	3	1529	671.5									10.9	110	536	229						2.5	3	10												100	295
2.8	3	1529	671.5									11.3	6	508	591						3	1	10												125	295
2.8	3	1529	671.5									11.3	16	508	524.5						3	5	10												130	300
2.8	3	1529	671.5									11.3	16	508	524.5						3	2	40												160	300
2.8	1.25	1529	1141.5									11.3	24	508	502						3	2	40												170	310
2.8	1	1529	1261.5									11.3	29	508	476						1.25	2	40												170	310
3.2	0.15	1517.5	1655.5									11.3	60	508	360						1	6	8												190	315
3.2	0.05	1517.5	1663.5									11.3	76	508	314						0.15	1	12.5												210	320
3.2	0.05	1517.5	1663.5									11.9	20	472.5	512.5						0.05	1	12.5												270	340
3.2	4	1517.5	544.5									11.9	30	472.5	468.5						0.05	1	1												275	340
5	5	1506	450									11.9	30	472.5	468.5						4	2	5												300	340
5	3	1506	671.5									11.9	30	472.5	468.5						5	3	15												300	380
5	3	1506	671.5									11.9	40	472.5	434						3	2	40												325	380
5	3	1506	671.5									11.9	40	472.5	434						3	2	2.5												370	380
5	3	1506	671.5									11.9	40	472.5	434						3	3	2.5												400	410
5	1	1506	1261.5									11.9	40	472.5	434						3	2	15												500	430
5	1	1506	1261.5									11.9	40	472.5	434						1	3	15												30	450
5	1	1506	1261.5									11.9	40	472.5	434						1	5	10												30	450
5	2	1506	904.5									11.9	40	472.5	434						1	1	5												2	450
5	2	1506	904.5									11.9	40	472.5	434						2	2	20												2.5	450
5	0.5	1506	1494									11.9	40	472.5	434						2	2	20												5	460
5	5	1506	450									11.9	40	472.5	434						0.5	4	20												5	470
5	5	1506	450									11.9	40	472.5	434						5	1	35												5	490
5	10	1506	239.5									11.9	50	472.5	395						5	1	8												5	500
5	1	1506	1261.5									11.9	50	472.5	395						10	4	10												5	530
5	5	1506	450									11.9	60	472.5	360						1	6	4												5	600
5	15	1506	127.5									11.9	60	472.5	360						5	4	6												5	600
5	15	1506	127.5									11.9	60	472.5	360						15	2	10												5	600
5	2	1506	904.5									11.9	60	472.5	360						15	3	10												5	600
5.6	4	1460.5	544.5									11.9	70	472.5	331.5						2	1	10												5	640
5.6	7	1460.5	354.5									11.9	70	472.5	331.5						4	1	42												5	665
5.6	3	1460.5	671.5									11.9	80	472.5	303						7	2	25												5	680
5.6	9.5	1460.5	273									11.9	80	472.5	303						3	1.5	25												9.5	680
5.6	1	1460.5	1261.5									11.9	80	472.5	303						9.5	2	35												9.5	690
5.6	1	1460.5	1261.5									11.9	80	472.5	303						1	2	40												10	850
5.6	1	1460.5	1261.5									11.9	80	472.5	303						1	1.5	10												6	850
5.6	1	1460.5	1261.5									11.9	80	472.5	303						1	1	10												10	900
5.6	0.75	1460.5	1392.5									11.9	90	472.5	280						1	2	20												10	1150
5.6	0.5	1460.5	1494									11.9	90	472.5	280						0.75	2	20												12	2300
5.6	0.5	1460.5	1494									11.9	90	472.5	280						0.5	2	7.5												13	4200
5.6	0.5	1460.5	1494									11.9	90	472.5	280						0.5	2	5												14
5.6	0.5	1460.5	1494									11.9	100	472.5	250						0.5	2	45												15
5.6	0.3	1460.5	1580									11.9	100	472.5	250						0.5	4	3												15
5.6	0.3	1460.5	1580									11.9	100	472.5	250						0.3	4	2												16
5.6	0.5	1460.5	1494									11.9	100	472.5	250						0.3	1	13												16
5.6	0.5	1460.5	1494									11.9	100	472.5	250						0.5	0.75	13												16
5.6	1.5	1460.5	1076.5									11.9	100	472.5	250						0.5	4	7												16
5.6	10	1460.5	239.5									11.9	100	472.5	250						1.5	0.75	7												21
5.6	2	1460.5	904.5									11.9	100	472.5	250						10	1	7												22
5.6	0.5	1460.5	1494									11.9	100	472.5	250						2	15	15												23
5.6	0.6	1460.5	1437.5									11.9	100	472.5	250						0.5	35	15												25
5.6	0.6	1460.5	1437.5									11.9	100	472.5	250						0.6	25	15												25
5.6	0.5	1460.5	1494									11.9	100	472.5	250						0.6	5	10												26
5.6	0.3	1460.5	1580									11.9	100	472.5	250						0.5	5	20												26
5.6	0.3	1460.5	1580									11.9	110	472.5	229						0.3	5	8												26
5.6	0.4	1460.5	1551.5									11.9	120	472.5	212						0.3	30	16												26
5.6	0.5	1460.5	1494									11.9	120	472.5	212						0.4	5	5												26
5.6	1.5	1460.5	1076.5									11.9	120	472.5	212						0.5	5	8												26
5.6	2	1460.5	904.5									11.9	130	472.5	197						1.5	5	55												26
5.6	1.5	1460.5	1076.5									11.9	160	472.5	162						2	5	50												26
5.6	0.5	1460.5	1494									11.9	160	472.5	162						1.5	5	35												26
5.6	0.5	1460.5	1494									11.9	160	472.5	162						0.5	5	55												26
5.6	0.6	1460.5	1437.5									11.9	160	472.5	162						0.5	25	20												26
5.6	0.6	1460.5	1437.5									11.9	160	472.5	162						0.6	10	40												26
5.6	0.5	1460.5	1494									11.9	160	472.5	162						0.6	35	40												26
5.6	0.3	1460.5	1580									11.9	160	472.5	162						0.5	35	50												27
5.6	0.3	1460.5	1580									11.9	160	472.5	162						0.3	35	10												29
5.6	12	1460.5	192									11.9	210	472.5	118.5						0.3	25	22.5												34
5.6	2	1460.5	904.5									11.9	230	472.5	109.5						12	20	60												35
5.6	3	1460.5	671.5									11.9	240	472.5	105						2	12	60												35
5.6	0.75	1460.5	1392.5									11.9	260	472.5	98						3	3	8												40
5.6	9	1460.5	279									11.9	280	472.5	87						0.75	3	2.5												44
5.6	0.5	1460.5	1494									12.2	15	423.5	531						9	6	35												50
5.6	2	1460.5	904.5									12.2	15	423.5	531						0.5	1.5	15												60
5.6	2	1460.5	904.5									12.2	18	423.5	517.5						2	15	30												60
5.6	11	1460.5	203									12.2	25	423.5	497						2	3	30												65
5.6	5	1460.5	450									12.2	30	423.5	468.5						11	8	8												65
5.6	2	1460.5	904.5									12.2	32	423.5	461.5						5	10	5												75
5.6	2	1460.5	904.5									12.2	45	423.5	411						2	10	8												85
5.6	1	1460.5	1261.5									12.2	50	423.5	395						2	10	14												85
5.6	5	1460.5	450									12.2	55	423.5	378						1	10	36												117
5.6	3	1460.5	671.5									12.2	55	423.5	378						5	5	15												120
5.6	2	1460.5	904.5									12.2	65	423.5	344.5						3	3	12.5												120
5.6	2	1460.5	904.5									12.2	75	423.5	320						2	4.5	2.5												140
5.6	2	1460.5	904.5									12.2	75	423.5	320						2	3.5	13												175
5.6	3.5	1460.5	596.5									12.2	75	423.5	320						2	1.75	17												209
5.6	6	1460.5	384.5									12.2	75	423.5	320						3.5	1.7	7.5												209
5.6	1.2	1460.5	1161									12.2	75	423.5	320						6	1.7	7.5												209
5.6	4.5	1460.5	499.5									12.2	85	423.5	290						1.2	5	10												210
5.6	2	1460.5	904.5									12.2	85	423.5	290						4.5	1	10												230
5.6	1.2	1460.5	1161									12.2	100	423.5	250						2	1	10												230
5.6	2	1460.5	904.5									12.2	125	423.5	201						1.2	3	20												230
5.6	2	1460.5	904.5									12.2	130	423.5	197						2	3	30												250
5.6	0.5	1460.5	1494									12.2	160	423.5	162						2	4	35												275
5.6	2	1460.5	904.5									12.2	170	423.5	150						0.5	4	40												290
5.6	4	1460.5	544.5									12.2	170	423.5	150						2	4	35												290
5.6	4	1460.5	544.5									12.2	190	423.5	130.5						4	1.5	35												330
5.6	3	1460.5	671.5									12.2	210	423.5	118.5						4	1	20												358
5.6	3	1460.5	671.5									12.2	270	423.5	92						3	3	15												360
5.6	2	1460.5	904.5									12.2	275	423.5	89.5						3	3	10												395
5.6	2	1460.5	904.5									12.2	300	423.5	79.5						2	4	5												430
5.7	3	1403.5	671.5									12.2	300	423.5	79.5						2	2	8												430
5.7	2.2	1403.5	815.5									12.2	325	423.5	73						3	2	6												430
5.7	3	1403.5	671.5									12.2	370	423.5	66						2.2	0.5	6												430
5.7	2.5	1403.5	772.5									12.2	400	423.5	61						3	0.5	12												435
5.7	1.5	1403.5	1076.5									12.2	500	423.5	34.5						2.5	3	5.5												475
5.7	1.5	1403.5	1076.5									15.3	30	405.5	468.5						1.5	1.5	2												475
5.7	1.1	1403.5	1176									15.3	30	405.5	468.5						1.5	0.75	2												502
5.7	1.1	1403.5	1176									15.8	2	397.5	640						1.1	1	3												661
5.7	1.5	1403.5	1076.5									15.8	2.5	397.5	634						1.1	0.25	5												670
5.7	2.25	1403.5	811									15.8	5	397.5	603.5						1.5	0.75	1.5												837
5.7	1	1403.5	1261.5									15.8	5	397.5	603.5						2.25	0.5	2.5												1322
5.7	2	1403.5	904.5									15.8	5	397.5	603.5						1	0.2	7.5												1322
5.7	1.8	1403.5	997.5									15.8	5	397.5	603.5						2	0.4	2.5												1449
5.7	1.8	1403.5	997.5									15.8	5	397.5	603.5						1.8	0.4	2.5												1449
5.7	0.5	1403.5	1494									15.8	5	397.5	603.5						1.8	0.4	12.5												1566
5.7	0.5	1403.5	1494									15.8	5	397.5	603.5						0.5	0.4	7.5												1616
5.7	1	1403.5	1261.5									15.8	5	397.5	603.5						0.5	0.5	5												1616
5.7	1.5	1403.5	1076.5									15.8	5	397.5	603.5						1	1.5	7.5												1800
5.7	1.25	1403.5	1141.5									15.8	5	397.5	603.5						1.5	1.5	2.5												1800
5.7	0.25	1403.5	1615									15.8	5	397.5	603.5						1.25	0.8	12.5												1800
5.7	0.75	1403.5	1392.5									15.8	5	397.5	603.5						0.25	0.8	5												1800
5.7	0.75	1403.5	1392.5									24.6	9.5	389	571.5						0.75	0.8	12.5												1800
5.7	0.4	1403.5	1551.5									24.6	9.5	389	571.5						0.75	0.8	20												1800
5.7	0.7	1403.5	1419.5									24.6	10	389	564.5						0.4	0.8	20												80
5.7	0.5	1403.5	1494									26.4	6	343	591						0.7	1	22.5												170
5.7	0.6	1403.5	1437.5									26.4	10	343	564.5						0.5	1	7.5												170
5.7	0.5	1403.5	1494									26.4	10	343	564.5						0.6	0.6	10												170
5.7	1	1403.5	1261.5									26.4	12	343	548						0.5	2.6	10												180
5.7	1	1403.5	1261.5									26.4	13	343	540.5						1	2.25	20												180
5.7	1.25	1403.5	1141.5									26.4	14	343	537						1	1	7.5												180
5.7	0.5	1403.5	1494									26.4	15	343	531						1.25	2.5	15												180
5.7	0.5	1403.5	1494									26.4	15	343	531						0.5	1.25	15												182
5.7	1	1403.5	1261.5									26.4	16	343	524.5						0.5	0.75	7.5												214
5.7	1	1403.5	1261.5									26.4	16	343	524.5						1	1.25	15												440
5.7	1	1403.5	1261.5									26.4	16	343	524.5						1	0.6	3												450
5.7	1	1403.5	1261.5									26.4	16	343	524.5						1	0.6	10												450
5.7	1	1403.5	1261.5									26.4	21	343	509						1	0.5	2.5												450
5.7	0.8	1403.5	1361.5									26.4	22	343	507						1	0.5	20												450
5.7	1	1403.5	1261.5									26.4	23	343	503.5						0.8	2	20												490
5.7	0.7	1403.5	1419.5									26.4	25	343	497						1	0.5	20												490
5.7	1.1	1403.5	1176									26.4	25	343	497						0.7	0.5	20												490
5.7	0.2	1403.5	1645.5									26.4	26	343	486						1.1	0.7	15												490
8.3	1	1368	1261.5									26.4	26	343	486						0.2	0.25	12.5												40
8.3	2	1368	904.5									26.4	26	343	486						1	2	8												90
8.3	1.5	1368	1076.5									26.4	26	343	486						2	2	2												120
8.3	2	1368	904.5									26.4	26	343	486						1.5	2	2.5												120
8.3	2	1368	904.5									26.4	26	343	486						2	1	8												140
8.3	2	1368	904.5									26.4	26	343	486						2	1	7.5												140
8.3	3	1368	671.5									26.4	26	343	486						2	0.75	7.5												180
8.3	3	1368	671.5									26.4	26	343	486						3	0.75	5												180
8.3	2.5	1368	772.5									26.4	26	343	486						3	1.5	12.5												260
8.3	4	1368	544.5									26.4	26	343	486						2.5	2	5												260
8.3	4	1368	544.5									26.4	26	343	486						4	2	10												10
8.3	3	1368	671.5									26.4	26	343	486						4	1.8	12.5												25
8.3	2.5	1368	772.5									26.4	27	343	479						3	1.8	15												30
8.3	2.5	1368	772.5									26.4	29	343	476						2.5	2	5												30
8.3	3	1368	671.5									26.4	34	343	459						2.5	2	2.5												35
8.3	2	1368	904.5									26.4	35	343	455						3	1.8	17.5												40
8.3	2	1368	904.5									26.4	35	343	455						2	1.8	17.5												50
8.3	3	1368	671.5									26.4	40	343	434						2	1.8	15												50
8.3	3	1368	671.5									26.4	44	343	414						3	1.8	10												50
8.3	2	1368	904.5									26.4	50	343	395						3	1.8	10												60
8.3	2.5	1368	772.5									26.4	60	343	360						2	1.2	10												65
8.3	2.5	1368	772.5									26.4	60	343	360						2.5	1.5	10												70
8.3	2.5	1368	772.5									26.4	65	343	344.5						2.5	1.5	10												90
8.3	2.5	1368	772.5									26.4	65	343	344.5						2.5	3	10												90
8.3	2.5	1368	772.5									26.4	75	343	320						2.5	1	10												90
8.3	2	1368	904.5									26.4	85	343	290						2.5	2	8												90
8.3	2	1368	904.5									26.4	85	343	290						2	1.5	2												90
8.3	2	1368	904.5									26.4	117	343	223						2	1.5	5												100
8.3	2	1368	904.5									26.4	120	343	212						2	2.5	12.5												100
9.1	5.5	1309	403									26.4	120	343	212						2	1.5	7.5												110
9.1	5.5	1309	403									26.4	140	343	185.5						5.5	1.5	4												120
9.1	5	1309	450									26.4	175	343	145						5.5	1.5	12												120
9.1	3.5	1309	596.5									26.4	209	343	122						5	2.25	20												120
9.1	4	1309	544.5									26.4	209	343	122						3.5	1	10												130
9.1	7	1309	354.5									26.4	209	343	122						4	10.5	10												140
9.1	7	1309	354.5									26.4	210	343	118.5						7	10	2												150
9.1	4	1309	544.5									26.4	230	343	109.5						7	0.45	2												180
9.1	4	1309	544.5									26.4	230	343	109.5						4	1	6												220
9.1	6	1309	384.5									26.4	230	343	109.5						4	1.25	6												1
9.1	4.5	1309	499.5									26.4	250	343	102.5						6	0.25	8												2
9.1	4.5	1309	499.5									26.4	275	343	89.5						4.5	0.25	2.5												2.5
9.1	1	1309	1261.5									26.4	290	343	84.5						4.5	0.25	15												3
9.1	2	1309	904.5									26.4	290	343	84.5						1	0.75	10												3
9.1	3	1309	671.5									26.4	330	343	72						2	2	8												3.5
9.1	1	1309	1261.5									26.4	358	343	68						3	0.3	7												3.6
9.1	2	1309	904.5									26.4	360	343	67						1	0.4	5												3.8
9.1	5	1309	450									26.4	395	343	62						2	0.15	12.5												4
9.1	5	1309	450									26.4	430	343	57						5	0.25	11												4
9.1	2	1309	904.5									26.4	430	343	57						5	0.2	8												4
9.1	2	1309	904.5									26.4	430	343	57						2	0.2	10												4.5
9.1	1.5	1309	1076.5									26.4	430	343	57						2	2	12.5												5
9.1	1.5	1309	1076.5									26.4	435	343	54						1.5	2	0.5												5
9.1	2	1309	904.5									26.4	475	343	41.5						1.5	1.5	3.1												5
9.1	3.5	1309	596.5									26.4	475	343	41.5						2	3.5	7												5
9.1	1	1309	1261.5									26.4	502	343	33						3.5	2	1												5
9.1	3	1309	671.5									26.4	661	343	26						1	1.8	4.5												5.5
9.1	1.5	1309	1076.5									26.4	670	343	24						3	0.6	4.4												6
9.1	3	1309	671.5									26.4	837	343	20						1.5	1.2	1.2												7
9.1	1	1309	1261.5									26.4	1322	343	14.5						3	5	4.1												7
9.1	2.5	1309	772.5									26.4	1322	343	14.5						1	10	1.1												8
9.1	1.5	1309	1076.5									26.4	1449	343	12.5						2.5	3	0.9												9
9.1	1.5	1309	1076.5									26.4	1449	343	12.5						1.5	8	2.9												9
9.1	2	1309	904.5									26.4	1566	343	11						1.5	3.25	7.4												9
9.1	2	1309	904.5									26.4	1616	343	9.5						2	0.5	0.7												9
9.1	2	1309	904.5									26.4	1616	343	9.5						2	0.5	5.5												9
9.1	4	1309	544.5									26.4	1800	343	5.5						2	0.7													9
9.1	3	1309	671.5									26.4	1800	343	5.5						4	1													10
9.1	4	1309	544.5									26.4	1800	343	5.5						3	0.85													10.5
9.1	3	1309	671.5									26.4	1800	343	5.5						4	2.4													11
9.1	4	1309	544.5									26.4	1800	343	5.5						3	1.6													11
9.1	2	1309	904.5									26.4	1800	343	5.5						4	1													12
9.1	2	1309	904.5									27	80	289	303						2	0.9													12
9.1	2	1309	904.5									27	170	289	150						2	1.75													12
9.1	2	1309	904.5									27	170	289	150						2	3													12
9.1	3	1309	671.5									27	170	289	150						2	1.52													12
9.1	4	1309	544.5									27	180	289	141						3	4.57													12
9.1	3	1309	671.5									27	180	289	141						4	0.6													13
9.1	2	1309	904.5									27	180	289	141						3	0.6													40
9.1	2	1309	904.5									27	180	289	141						2	0.4													40
9.1	2	1309	904.5									27	182	289	137						2	0.9													40
9.1	2	1309	904.5									27	214	289	116						2	1.5													50
9.1	1	1309	1261.5									27	440	289	53						2	0.6													60
9.1	2	1309	904.5									27	450	289	48.5						1	0.6													80
9.1	2	1309	904.5									27	450	289	48.5						2	1.7													90
9.1	1	1309	1261.5									27	450	289	48.5						2	0.6													120
9.1	1.5	1309	1076.5									27	450	289	48.5						1	3.3													12.5
9.1	1.5	1309	1076.5									27	490	289	38						1.5	1.5													18
9.1	1.5	1309	1076.5									27	490	289	38						1.5	15													19
9.1	1.5	1309	1076.5									27	490	289	38						1.5	3													23
9.1	1	1309	1261.5									27	490	289	38						1.5	7													25
9.1	1.5	1309	1076.5									41.6	40	274.5	434						1	3													29
9.1	1.5	1309	1076.5									41.6	90	274.5	280						1.5	8													33
9.1	2	1309	904.5									41.6	120	274.5	212						1.5	30													42
9.1	1.5	1309	1076.5									41.6	120	274.5	212						2	7.5													42
9.1	1.5	1309	1076.5									41.6	140	274.5	185.5						1.5	34.5													42
9.1	1.5	1309	1076.5									41.6	140	274.5	185.5						1.5	4													42
9.1	1.5	1309	1076.5									41.6	180	274.5	141						1.5	20													42
9.1	0.6	1309	1437.5									41.6	180	274.5	141						1.5	10													42
9.1	0.4	1309	1551.5									41.6	260	274.5	98						0.6	28.75													60
9.1	1	1309	1261.5									41.6	260	274.5	98						0.4	30													60
9.1	1	1309	1261.5									61.6	10	255.5	564.5						1	4													60
9.1	1.5	1309	1076.5									61.6	25	255.5	497						1	4
9.1	1.5	1309	1076.5									61.6	30	255.5	468.5						1.5	5
9.1	0.5	1309	1494									61.6	30	255.5	468.5						1.5	5
9.1	0.5	1309	1494									61.6	35	255.5	455						0.5	5
9.1	1	1309	1261.5									61.6	40	255.5	434						0.5	1.2
9.1	1	1309	1261.5									61.6	50	255.5	395						1	2.6
9.1	1	1309	1261.5									61.6	50	255.5	395						1	2
9.1	1.5	1309	1076.5									61.6	50	255.5	395						1	0.8
9.1	1.5	1309	1076.5									61.6	60	255.5	360						1.5	0.8
9.1	2	1309	904.5									61.6	65	255.5	344.5						1.5	1.6
9.1	3	1309	671.5									61.6	70	255.5	331.5						2	2.8
9.1	4.5	1309	499.5									61.6	90	255.5	280						3	0.25
9.1	4	1309	544.5									61.6	90	255.5	280						4.5	0.25
9.1	3.5	1309	596.5									61.6	90	255.5	280						4	0.25
9.1	3	1309	671.5									61.6	90	255.5	280						3.5	1.6
9.1	2	1309	904.5									61.6	90	255.5	280						3	1.6
9.1	3	1309	671.5									61.6	100	255.5	250						2	0.6
9.4	14	1263.5	152									61.6	100	255.5	250						3	1.2
9.4	14	1263.5	152									61.6	110	255.5	229						14	34.5
10.9	10	1238	239.5									61.6	120	255.5	212						14	34.5
10.9	8	1238	300									61.6	120	255.5	212							35
10.9	10	1238	239.5									61.6	120	255.5	212							20
10.9	15	1238	127.5									61.6	130	255.5	197							15
10.9	15	1238	127.5									61.6	140	255.5	185.5							5
10.9	17	1238	101.5									61.6	150	255.5	173.5							5
10.9	7.5	1238	327									61.6	180	255.5	141							5
10.9	7.5	1238	327									61.6	220	255.5	113.5							6.25
10.9	15	1238	127.5									66	1	218	647							2
10.9	2.5	1238	772.5									66	2	218	640							1.75
10.9	2	1238	904.5									66	2.5	218	634							1.75
10.9	4	1238	544.5									66	3	218	630.5							15
10.9	2	1238	904.5									66	3	218	630.5							4.5
10.9	5	1238	450									66	3.5	218	627.5							15
10.9	3	1238	671.5									66	3.6	218	626							3.5
10.9	2.5	1238	772.5									66	3.8	218	625							4
10.9	3	1238	671.5									66	4	218	619							5
10.9	8	1238	300									66	4	218	619							7
10.9	10	1238	239.5									66	4	218	619							7
10.9	2.5	1238	772.5									66	4.5	218	613							2
10.9	3	1238	671.5									66	5	218	603.5							1.75
10.9	5	1238	450									66	5	218	603.5							1.75
10.9	2	1238	904.5									66	5	218	603.5							1
10.9	5	1238	450									66	5	218	603.5							25
10.9	5	1238	450									66	5	218	603.5							3
10.9	5	1238	450									66	5.5	218	594							8
10.9	5	1238	450									66	6	218	591							3
10.9	5	1238	450									66	7	218	587.5							2
10.9	2	1238	904.5									66	7	218	587.5							2
10.9	2	1238	904.5									66	8	218	584.5							1
10.9	7.5	1238	327									66	9	218	577							2
10.9	2.5	1238	772.5									66	9	218	577							15
10.9	7.5	1238	327									66	9	218	577							15
10.9	5	1238	450									66	9	218	577							3
10.9	10	1238	239.5									66	9	218	577							7
10.9	12	1238	192									66	9	218	577							3
10.9	5	1238	450									66	10	218	564.5							3
10.9	0.5	1238	1494									66	10.5	218	558							5
10.9	1.5	1238	1076.5									66	11	218	556							2
10.9	5	1238	450									66	11	218	556							5
10.9	15	1238	127.5									66	12	218	548							1.5
10.9	1	1238	1261.5									66	12	218	548							7.5
10.9	4	1238	544.5									66	12	218	548							7.5
10.9	3	1238	671.5									66	12	218	548							12.5
10.9	2	1238	904.5									66	12	218	548							15
10.9	2	1238	904.5									66	12	218	548							15
10.9	3	1238	671.5									66	13	218	540.5							20
10.9	10	1238	239.5									66	40	218	434							4
10.9	1	1238	1261.5									66	40	218	434							20
11	15	1200	127.5									66	40	218	434							4
11	15	1200	127.5									66	50	218	395							22
11	6	1200	384.5									66	60	218	360							26
11	7	1200	354.5									66	80	218	303							29
11	2.5	1200	772.5									66	90	218	280							30
11	12	1200	192									66	120	218	212							11
11	3	1200	671.5									100	12.5	186.5	542							6
11	9	1200	279									100	18	186.5	517.5							8
11	1	1200	1261.5									100	19	186.5	516							10
11	16	1200	105									100	23	186.5	503.5							12
11	4	1200	544.5									100	25	186.5	497							20
11	9	1200	279									100	29	186.5	476							5
11	5	1200	450									100	33	186.5	460							12
11	6.5	1200	369									100	42	186.5	417.5							7.5
11	7	1200	354.5									100	42	186.5	417.5							7.5
11	3	1200	671.5									100	42	186.5	417.5							12
11	9	1200	279									100	42	186.5	417.5							12
11	3	1200	671.5									100	42	186.5	417.5							7.5
11	2.5	1200	772.5									100	42	186.5	417.5							3.75
11	5	1200	450									100	60	186.5	360							3.75
11	7	1200	354.5									100	60	186.5	360							3.75
11	2	1200	904.5									100	60	186.5	360							8.75
11	3	1200	671.5									168	10	89.5	564.5							14
11	4	1200	544.5									168	10	89.5	564.5							14.75
11	2	1200	904.5									168	10	89.5	564.5							16
11	2	1200	904.5									168	10	89.5	564.5							14
11	4	1200	544.5									168	20	89.5	512.5							2.5
11.3	20	1178.5	79.5									168	25	89.5	497							4
11.3	20	1178.5	79.5									168	25	89.5	497							3.5
11.3	20	1178.5	79.5									168	30	89.5	468.5							3
11.3	20	1178.5	79.5									168	35	89.5	455							6
11.3	20	1178.5	79.5									168	40	89.5	434							5
11.3	20	1178.5	79.5									168	40	89.5	434							7
11.3	18	1178.5	97.5									168	40	89.5	434							33
11.3	22	1178.5	60									168	40	89.5	434							21
11.3	10	1178.5	239.5									168	40	89.5	434							9
11.3	4	1178.5	544.5									168	45	89.5	411							2.8
11.3	4	1178.5	544.5									168	45	89.5	411							3
11.3	3	1178.5	671.5									168	49	89.5	407							3
11.3	3	1178.5	671.5									168	50	89.5	395							3
11.3	3	1178.5	671.5									168	50	89.5	395							4
11.3	3	1178.5	671.5									168	50	89.5	395							3
11.3	5	1178.5	450									168	50	89.5	395							8
11.4	0.75	1157	1392.5									168	50	89.5	395							1.5
11.4	1.5	1157	1076.5									168	50	89.5	395							0.5
11.4	1.25	1157	1141.5									168	55	89.5	378							1
11.4	1.5	1157	1076.5									168	55	89.5	378							1.5
11.4	1.75	1157	1009.5									168	60	89.5	360							3.5
11.4	1.5	1157	1076.5									168	60	89.5	360							0.5
11.4	1.75	1157	1009.5									168	60	89.5	360							4
11.4	2	1157	904.5									168	60	89.5	360							1.5
11.4	1.5	1157	1076.5									168	60	89.5	360							3.75
11.4	8	1157	300									168	60	89.5	360							5.5
11.4	1	1157	1261.5									168	60	89.5	360							3.5
11.4	2.5	1157	772.5									168	60	89.5	360							3.75
11.4	1	1157	1261.5									168	65	89.5	344.5							1.4
11.4	2.5	1157	772.5									168	65	89.5	344.5							1.4
11.4	2	1157	904.5									168	70	89.5	331.5							1.5
11.4	2	1157	904.5									168	70	89.5	331.5							1.5
11.4	1.5	1157	1076.5									168	70	89.5	331.5							1
11.4	1.5	1157	1076.5									168	70	89.5	331.5							1.25
11.4	2	1157	904.5									168	70	89.5	331.5							1.75
11.4	1	1157	1261.5									168	70	89.5	331.5							1
11.4	2.5	1157	772.5									168	70	89.5	331.5							1
11.4	0.25	1157	1615									168	70	89.5	331.5							1
11.4	2.5	1157	772.5									168	75	89.5	320							1.5
11.4	2.5	1157	772.5									168	75	89.5	320							1
11.4	1.5	1157	1076.5									168	75	89.5	320							2
11.4	1	1157	1261.5									168	80	89.5	303							4
11.4	1.5	1157	1076.5									168	80	89.5	303							6
11.9	2	1109.5	904.5									168	80	89.5	303							5
11.9	1	1109.5	1261.5									168	80	89.5	303							6
11.9	2	1109.5	904.5									168	80	89.5	303							3
11.9	2	1109.5	904.5									168	80	89.5	303							6
11.9	2	1109.5	904.5									168	80	89.5	303							3
11.9	1	1109.5	1261.5									168	80	89.5	303							6
11.9	1	1109.5	1261.5									168	80	89.5	303							2
11.9	4	1109.5	544.5									168	80	89.5	303							7
11.9	3	1109.5	671.5									168	80	89.5	303							3
11.9	4	1109.5	544.5									168	85	89.5	290							3
11.9	4	1109.5	544.5									168	90	89.5	280							1
11.9	1	1109.5	1261.5									168	90	89.5	280							15
11.9	0.75	1109.5	1392.5									168	90	89.5	280							2
11.9	4	1109.5	544.5									168	95	89.5	270							5.5
11.9	4	1109.5	544.5									168	95	89.5	270							4.5
11.9	1	1109.5	1261.5									168	100	89.5	250							3
11.9	1	1109.5	1261.5									168	100	89.5	250							2
11.9	4	1109.5	544.5									168	100	89.5	250							2
11.9	2	1109.5	904.5									168	100	89.5	250							2
11.9	3	1109.5	671.5									168	100	89.5	250							1
11.9	1	1109.5	1261.5									168	100	89.5	250							1
11.9	5	1109.5	450									168	100	89.5	250							1
11.9	2	1109.5	904.5									168	100	89.5	250							1.5
11.9	2	1109.5	904.5									168	100	89.5	250							1
11.9	2	1109.5	904.5									168	100	89.5	250							3
11.9	6	1109.5	384.5									168	100	89.5	250							5
11.9	1	1109.5	1261.5									168	100	89.5	250							5
11.9	1	1109.5	1261.5									168	100	89.5	250							4
11.9	1	1109.5	1261.5									168	105	89.5	232.5							3
11.9	2	1109.5	904.5									168	110	89.5	229							5
11.9	3	1109.5	671.5									168	110	89.5	229							5
11.9	2	1109.5	904.5									168	115	89.5	225							3
11.9	2	1109.5	904.5									168	115	89.5	225							3
11.9	3	1109.5	671.5									168	120	89.5	212							4
11.9	2	1109.5	904.5									168	120	89.5	212							4
11.9	3	1109.5	671.5									168	120	89.5	212							4
11.9	5	1109.5	450									168	120	89.5	212							3
11.9	1	1109.5	1261.5									168	120	89.5	212							3
11.9	2	1109.5	904.5									168	120	89.5	212							3
11.9	2	1109.5	904.5									168	120	89.5	212							3
11.9	4	1109.5	544.5									168	120	89.5	212							12
11.9	1	1109.5	1261.5									168	120	89.5	212							3
11.9	1	1109.5	1261.5									168	120	89.5	212							3
11.9	4	1109.5	544.5									168	130	89.5	197							0.4
11.9	6	1109.5	384.5									168	130	89.5	197							0.55
11.9	4	1109.5	544.5									168	130	89.5	197							0.4
11.9	2	1109.5	904.5									168	130	89.5	197							0.25
11.9	3	1109.5	671.5									168	135	89.5	192							0.2
11.9	1	1109.5	1261.5									168	135	89.5	192							0.25
11.9	1	1109.5	1261.5									168	135	89.5	192							20
11.9	2	1109.5	904.5									168	140	89.5	185.5							18
11.9	1.5	1109.5	1076.5									168	140	89.5	185.5							10
11.9	2	1109.5	904.5									168	140	89.5	185.5							12
11.9	2	1109.5	904.5									168	140	89.5	185.5							10
11.9	1.5	1109.5	1076.5									168	140	89.5	185.5							15
11.9	1	1109.5	1261.5									168	140	89.5	185.5							9
11.9	2	1109.5	904.5									168	145	89.5	180							12
11.9	2	1109.5	904.5									168	150	89.5	173.5							10
11.9	2	1109.5	904.5									168	150	89.5	173.5							4
11.9	2	1109.5	904.5									168	150	89.5	173.5							14
11.9	2	1109.5	904.5									168	160	89.5	162							3
11.9	4	1109.5	544.5									168	160	89.5	162							2
11.9	4	1109.5	544.5									168	170	89.5	150							2
11.9	1	1109.5	1261.5									168	170	89.5	150							4
11.9	0.75	1109.5	1392.5									168	185	89.5	135							2
11.9	4	1109.5	544.5									168	190	89.5	130.5							2
11.9	0.75	1109.5	1392.5									168	190	89.5	130.5							2
11.9	1	1109.5	1261.5									168	190	89.5	130.5							2
12.2	15	1058.5	127.5									168	190	89.5	130.5							2
12.2	35	1058.5	25.5									168	190	89.5	130.5							2
12.2	25	1058.5	52									168	200	89.5	125.5							1
12.2	5	1058.5	450									168	200	89.5	125.5							0.5
12.2	5	1058.5	450									168	200	89.5	125.5							0.5
12.2	5	1058.5	450									168	200	89.5	125.5							1
12.2	30	1058.5	39.5									168	210	89.5	118.5							3
12.2	5	1058.5	450									168	220	89.5	113.5							1
12.2	5	1058.5	450									168	220	89.5	113.5							1
12.2	5	1058.5	450									168	220	89.5	113.5							1
12.2	5	1058.5	450									168	235	89.5	107							0.5
12.2	5	1058.5	450									168	240	89.5	105							2
12.2	5	1058.5	450									168	240	89.5	105							1
12.2	25	1058.5	52									168	260	89.5	98							3
12.2	10	1058.5	239.5									168	260	89.5	98							4
12.2	35	1058.5	25.5									168	260	89.5	98							0.5
12.2	35	1058.5	25.5									168	260	89.5	98							0.5
12.2	35	1058.5	25.5									168	265	89.5	94							1
12.2	25	1058.5	52									168	270	89.5	92							0.5
12.2	20	1058.5	79.5									168	270	89.5	92							0.5
12.2	12	1058.5	192									168	280	89.5	87							5
12.2	3	1058.5	671.5									168	280	89.5	87							5
12.2	3	1058.5	671.5									168	295	89.5	82.5							1.5
12.2	6	1058.5	384.5									168	295	89.5	82.5							1.5
12.2	1.5	1058.5	1076.5									168	300	89.5	79.5							4
12.2	15	1058.5	127.5									168	300	89.5	79.5							12
12.2	3	1058.5	671.5									168	310	89.5	76.5							2
12.2	8	1058.5	300									168	310	89.5	76.5							4
12.2	10	1058.5	239.5									168	315	89.5	75							2
12.2	10	1058.5	239.5									168	320	89.5	74							7
12.2	10	1058.5	239.5									168	340	89.5	70							1
12.2	10	1058.5	239.5									168	340	89.5	70							2
12.2	5	1058.5	450									168	340	89.5	70							11
12.2	3	1058.5	671.5									168	380	89.5	64							3.5
13.3	4.5	995.5	499.5									168	380	89.5	64							3.5
13.3	3.5	995.5	596.5									168	380	89.5	64							1.5
13.3	1.75	995.5	1009.5									168	410	89.5	60							1.5
13.3	1.7	995.5	1018									168	430	89.5	57							4
13.3	1.7	995.5	1018									168	450	89.5	48.5							1
13.3	5	995.5	450									168	450	89.5	48.5							1.5
13.3	1	995.5	1261.5									168	450	89.5	48.5							1
13.3	1	995.5	1261.5									168	450	89.5	48.5							0.3
13.3	3	995.5	671.5									168	460	89.5	44							0.3
13.3	3	995.5	671.5									168	470	89.5	43							0.4
13.3	4	995.5	544.5									168	490	89.5	38							0.3
13.3	4	995.5	544.5									168	500	89.5	34.5							0.5
13.3	4	995.5	544.5									168	530	89.5	32							0.5
13.3	1.5	995.5	1076.5									168	600	89.5	29.5							0.5
13.3	1	995.5	1261.5									168	600	89.5	29.5							0.5
13.3	3	995.5	671.5									168	600	89.5	29.5							0.5
13.3	3	995.5	671.5									168	600	89.5	29.5							0.5
13.3	4	995.5	544.5									168	640	89.5	27							0.25
13.3	2	995.5	904.5									168	665	89.5	25							8
13.3	2	995.5	904.5									168	680	89.5	22.5							12
13.3	0.5	995.5	1494									168	680	89.5	22.5							10
13.3	0.5	995.5	1494									168	690	89.5	21							26
13.3	3	995.5	671.5									168	850	89.5	18.5							6
13.3	1.5	995.5	1076.5									168	850	89.5	18.5							6
13.3	0.75	995.5	1392.5									168	900	89.5	17							2.5
13.3	1	995.5	1261.5									168	1150	89.5	16							2
13.3	0.25	995.5	1615									168	2300	89.5	2							1
13.3	0.75	995.5	1392.5									168	4200	89.5	1							3
13.3	0.5	995.5	1494																			0.75
13.3	0.2	995.5	1645.5																			10
13.3	0.4	995.5	1551.5																			10
13.3	0.4	995.5	1551.5																			1
13.3	0.4	995.5	1551.5																			2.5
13.3	0.4	995.5	1551.5																			2
13.3	0.5	995.5	1494																			1.5
13.3	1.5	995.5	1076.5																			7.5
13.3	1.5	995.5	1076.5																			7
13.3	0.8	995.5	1361.5																			9
13.3	0.8	995.5	1361.5																			1
13.3	0.8	995.5	1361.5																			0.75
13.3	0.8	995.5	1361.5																			4
13.3	0.8	995.5	1361.5																			12
13.3	1	995.5	1261.5																			1
13.3	1	995.5	1261.5																			5
13.3	0.6	995.5	1437.5																			0.75
13.3	2.6	995.5	741.5																			2.5
13.3	2.25	995.5	811																			0.75
13.3	1	995.5	1261.5																			1
13.3	2.5	995.5	772.5																			0.75
13.3	1.25	995.5	1141.5																			12
13.3	0.75	995.5	1392.5																			0.25
13.3	1.25	995.5	1141.5																			2.5
13.3	0.6	995.5	1437.5																			5
13.3	0.6	995.5	1437.5																			5
13.3	0.5	995.5	1494																			2.5
13.3	0.5	995.5	1494																			2.5
13.3	2	995.5	904.5																			10
13.3	0.5	995.5	1494																			3
13.3	0.5	995.5	1494																			0.5
13.3	0.7	995.5	1419.5																			2.5
13.3	0.25	995.5	1615																			5
13.3	2	995.5	904.5																			1
13.3	2	995.5	904.5																			6
13.3	2	995.5	904.5																			5
13.3	1	995.5	1261.5																			20
13.3	1	995.5	1261.5																			6
13.3	0.75	995.5	1392.5																			5
13.3	0.75	995.5	1392.5																			16
13.3	1.5	995.5	1076.5																			12.5
13.3	2	995.5	904.5																			20
13.3	2	995.5	904.5																			12.5
13.3	1.8	995.5	997.5																			7
13.3	1.8	995.5	997.5																			2.5
13.3	2	995.5	904.5																			12.5
13.3	2	995.5	904.5																			7
13.3	1.8	995.5	997.5																			3
13.3	1.8	995.5	997.5																			9
13.3	1.8	995.5	997.5																			15
13.3	1.8	995.5	997.5																			8
13.3	1.8	995.5	997.5																			5
13.3	1.2	995.5	1161																			14
13.3	1.5	995.5	1076.5																			6
13.3	1.5	995.5	1076.5																			12.5
13.3	3	995.5	671.5																			4
13.3	1	995.5	1261.5																			2.5
13.3	2	995.5	904.5																			0.5
13.3	1.5	995.5	1076.5																			7.5
13.3	1.5	995.5	1076.5																			20
13.3	2.5	995.5	772.5																			1.5
13.3	1.5	995.5	1076.5																			10
13.3	1.5	995.5	1076.5																			7
13.3	1.5	995.5	1076.5																			2.5
15.3	2.25	948.5	811																			10
15.3	1	948.5	1261.5																			1
15.8	10.5	935.5	206																			1
15.8	10	935.5	239.5																			8
15.8	0.45	935.5	1537																			2
15.8	1	935.5	1261.5																			2
15.8	1.25	935.5	1141.5																			7
15.8	0.25	935.5	1615																			7
15.8	0.25	935.5	1615																			4
15.8	0.25	935.5	1615																			7
15.8	0.75	935.5	1392.5																			3
15.8	2	935.5	904.5																			6
15.8	0.3	935.5	1580																			7
15.8	0.4	935.5	1551.5																			4
15.8	0.15	935.5	1655.5																			8
15.8	0.25	935.5	1615																			2
15.8	0.2	935.5	1645.5																			4
15.8	0.2	935.5	1645.5																			4.5
15.8	2	935.5	904.5																			2
15.8	2	935.5	904.5																			1
15.8	1.5	935.5	1076.5																			4
15.8	3.5	935.5	596.5																			1
15.8	2	935.5	904.5																			3
15.8	1.8	935.5	997.5																			2
15.8	0.6	935.5	1437.5																			5
15.8	1.2	935.5	1161																			2
19.5	5	922.5	450																			2
19.5	10	922.5	239.5																			0.5
24.6	3	915.5	671.5																			2
24.6	8	915.5	300																			4
24.6	3.25	915.5	607																			2
24.6	0.5	915.5	1494																			2
24.6	0.5	915.5	1494																			3
24.6	0.7	915.5	1419.5																			3
24.6	1	915.5	1261.5																			1
24.6	0.85	915.5	1352																			1
24.6	2.4	915.5	805.5																			1
24.6	1.6	915.5	1022.5																			2
24.6	1	915.5	1261.5																			0.75
24.6	0.9	915.5	1346																			2
25.4	1.75	908.5	1009.5																			20
25.4	3	908.5	671.5																			0.45
26.3	1.52	901	1026																			0.45
26.3	4.57	901	493																			0.35
26.3	0.6	901	1437.5																			0.35
26.3	0.6	901	1437.5																			0.25
26.3	0.4	901	1551.5																			0.25
26.3	0.9	901	1346																			0.1
26.3	1.5	901	1076.5																			0.25
26.3	0.6	901	1437.5																			0.25
26.3	0.6	901	1437.5																			0.25
26.3	1.7	901	1018																			0.25
26.3	0.6	901	1437.5																			8
26.3	3.3	901	606																			2
26.3	1.5	901	1076.5																			10
26.4	15	837	127.5																			15
26.4	3	837	671.5																			10
26.4	7	837	354.5																			1.25
26.4	3	837	671.5																			1
26.4	8	837	300																			0.8
26.4	30	837	39.5																			1
26.4	7.5	837	327																			0.25
26.4	34.5	837	33																			0.6
26.4	4	837	544.5																			0.25
26.4	20	837	79.5																			0.25
26.4	10	837	239.5																			1.5
26.4	28.75	837	45																			1
26.4	30	837	39.5																			0.5
26.4	4	837	544.5																			0.5
26.4	4	837	544.5																			1
26.4	5	837	450																			0.5
26.4	5	837	450																			0.5
26.4	5	837	450																			1.25
26.4	1.2	837	1161																			1
26.4	2.6	837	741.5																			2.25
26.4	2	837	904.5																			1
26.4	0.8	837	1361.5																			1
26.4	0.8	837	1361.5																			0.35
26.4	1.6	837	1022.5																			0.4
26.4	2.8	837	736.5																			2.25
26.4	0.25	837	1615																			1.75
26.4	0.25	837	1615																			2
26.4	0.25	837	1615																			2
26.4	1.6	837	1022.5																			4.5
26.4	1.6	837	1022.5																			5.5
26.4	0.6	837	1437.5																			10
26.4	1.2	837	1161																			1.25
26.4	34.5	837	33																			9
26.4	34.5	837	33																			7.5
26.4	35	837	25.5																			3.5
26.4	20	837	79.5																			1.5
26.4	15	837	127.5																			1.5
26.4	5	837	450																			0.5
26.4	5	837	450																			0.1
26.4	5	837	450																			0.1
26.4	6.25	837	370																			0.1
26.4	2	837	904.5																			15
26.4	1.75	837	1009.5																			12.5
26.4	1.75	837	1009.5																			5
26.4	15	837	127.5																			6
26.4	4.5	837	499.5																			3
26.4	15	837	127.5																			0.25
26.4	3.5	837	596.5																			1
26.4	4	837	544.5																			0.4
26.4	5	837	450																			1.25
26.4	7	837	354.5																			0.8
26.4	7	837	354.5																			0.3
26.4	2	837	904.5																			0.15
26.4	1.75	837	1009.5																			1.25
26.4	1.75	837	1009.5																			1.25
26.4	1	837	1261.5																			2.5
26.4	25	837	52																			1
26.4	3	837	671.5																			0.6
26.4	8	837	300																			0.4
26.4	3	837	671.5																			0.4
26.4	2	837	904.5																			0.5
26.4	2	837	904.5																			0.5
26.4	1	837	1261.5																			0.25
26.4	2	837	904.5																			0.4
26.4	15	837	127.5																			0.2
26.4	15	837	127.5																			0.2
26.4	3	837	671.5																			0.4
26.4	7	837	354.5																			0.7
26.4	3	837	671.5																			3
26.4	3	837	671.5																			6
26.4	5	837	450																			4.5
26.4	2	837	904.5																			3
26.4	5	837	450																			5.5
26.4	1.5	837	1076.5																			5
26.4	7.5	837	327																			5
26.4	7.5	837	327																			2.5
26.4	12.5	837	172.5																			2.5
26.4	15	837	127.5																			2.5
26.4	15	837	127.5																			4
26.4	20	837	79.5																			3
26.4	4	837	544.5																			5.5
26.4	20	837	79.5																			7
26.4	4	837	544.5																			3
26.4	22	837	60																			3
26.4	26	837	47.5																			3.75
26.4	29	837	44																			2
26.4	30	837	39.5																			1.5
26.4	11	837	203																			2
26.4	6	837	384.5																			1
26.4	8	837	300																			2
26.4	10	837	239.5																			3.5
26.4	12	837	192																			1
26.4	20	837	79.5																			3
26.4	5	837	450																			4
26.4	12	837	192																			2
26.4	7.5	837	327																			3
26.4	7.5	837	327																			3
26.4	12	837	192																			5
26.4	12	837	192																			3.5
26.4	7.5	837	327																			0.25
26.4	3.75	837	584																			2.5
26.4	3.75	837	584																			22.2
26.4	3.75	837	584																			0.25
26.4	8.75	837	285																			0.25
26.4	14	837	152																			1.5
26.4	14.75	837	148																			3
26.4	16	837	105																			3
26.4	14	837	152																			0.75
26.4	2.5	837	772.5																			2
26.4	4	837	544.5																			11
26.4	3.5	837	596.5																			1.5
26.4	3	837	671.5																			3
26.4	6	837	384.5																			1.5
26.4	5	837	450																			3
26.4	7	837	354.5																			6
27	33	749.5	35																			2.5
27	21	749.5	62																			2.5
27	9	749.5	279																			2.5
27	2.8	749.5	736.5																			5
27	3	749.5	671.5																			1
27	3	749.5	671.5																			5
27	3	749.5	671.5																			0.55
27	4	749.5	544.5																			2.45
27	3	749.5	671.5																			3
27	8	749.5	300																			2.5
27	1.5	749.5	1076.5																			2
27	0.5	749.5	1494																			9
27	1	749.5	1261.5																			0.5
27	1.5	749.5	1076.5																			1
27	3.5	749.5	596.5																			1.5
27	0.5	749.5	1494																			3
27	4	749.5	544.5																			0.7
27	1.5	749.5	1076.5																			0.7
27	3.75	749.5	584																			0.7
27	5.5	749.5	403																			2.4
27	3.5	749.5	596.5																			2
27	3.75	749.5	584																			2.25
27	1.4	749.5	1128																			0.25
27	1.4	749.5	1128																			2.25
27	1.5	749.5	1076.5																			1.75
27	1.5	749.5	1076.5																			3.75
27	1	749.5	1261.5																			1.5
27	1.25	749.5	1141.5																			1.5
27	1.75	749.5	1009.5																			1.5
27	1	749.5	1261.5																			2.5
27	1	749.5	1261.5																			3
27	1	749.5	1261.5																			0.75
27	1.5	749.5	1076.5
27	1	749.5	1261.5
27	2	749.5	904.5
27	4	749.5	544.5
27	6	749.5	384.5
27	5	749.5	450
27	6	749.5	384.5
27	3	749.5	671.5
27	6	749.5	384.5
27	3	749.5	671.5
27	6	749.5	384.5
27	2	749.5	904.5
27	7	749.5	354.5
27	3	749.5	671.5
27	3	749.5	671.5
27	1	749.5	1261.5
27	15	749.5	127.5
27	2	749.5	904.5
27	5.5	749.5	403
27	4.5	749.5	499.5
27	3	749.5	671.5
27	2	749.5	904.5
27	2	749.5	904.5
27	2	749.5	904.5
27	1	749.5	1261.5
27	1	749.5	1261.5
27	1	749.5	1261.5
27	1.5	749.5	1076.5
30	1	709.5	1261.5
30	3	709.5	671.5
30	5	709.5	450
30	5	709.5	450
30	4	709.5	544.5
30	3	709.5	671.5
30	5	709.5	450
30	5	709.5	450
30	3	709.5	671.5
30	3	709.5	671.5
30	4	709.5	544.5
30	4	709.5	544.5
30	4	709.5	544.5
30	3	709.5	671.5
30	3	709.5	671.5
30	3	709.5	671.5
30	3	709.5	671.5
30	12	709.5	192
30	3	709.5	671.5
30	3	709.5	671.5
31	0.4	696.5	1551.5
31	0.55	696.5	1451.5
31	0.4	696.5	1551.5
31	0.25	696.5	1615
31	0.2	696.5	1645.5
31	0.25	696.5	1615
41.6	20	688.5	79.5
41.6	18	688.5	97.5
41.6	10	688.5	239.5
41.6	12	688.5	192
41.6	10	688.5	239.5
41.6	15	688.5	127.5
41.6	9	688.5	279
41.6	12	688.5	192
41.6	10	688.5	239.5
41.6	4	688.5	544.5
45	14	669	152
45	3	669	671.5
45	2	669	904.5
45	2	669	904.5
45	4	669	544.5
45	2	669	904.5
45	2	669	904.5
45	2	669	904.5
45	2	669	904.5
45	2	669	904.5
45	2	669	904.5
45	1	669	1261.5
45	0.5	669	1494
45	0.5	669	1494
45	1	669	1261.5
45	3	669	671.5
45	1	669	1261.5
45	1	669	1261.5
45	1	669	1261.5
45	0.5	669	1494
45	2	669	904.5
45	1	669	1261.5
45	3	669	671.5
45	4	669	544.5
45	0.5	669	1494
45	0.5	669	1494
45	1	669	1261.5
45	0.5	669	1494
45	0.5	669	1494
46	5	645.5	450
46	5	645.5	450
46	1.5	645.5	1076.5
46	1.5	645.5	1076.5
46	4	645.5	544.5
46	12	645.5	192
46	2	645.5	904.5
46	4	645.5	544.5
46	2	645.5	904.5
46	7	645.5	354.5
46	1	645.5	1261.5
46	2	645.5	904.5
46	11	645.5	203
46	3.5	645.5	596.5
46	3.5	645.5	596.5
46	1.5	645.5	1076.5
46	1.5	645.5	1076.5
46	4	645.5	544.5
54.6	1	629.5	1261.5
54.6	1.5	629.5	1076.5
54.6	1	629.5	1261.5
54.6	0.3	629.5	1580
54.6	0.3	629.5	1580
54.6	0.4	629.5	1551.5
54.6	0.3	629.5	1580
54.6	0.5	629.5	1494
54.6	0.5	629.5	1494
54.6	0.5	629.5	1494
54.6	0.5	629.5	1494
54.6	0.5	629.5	1494
54.6	0.5	629.5	1494
54.6	0.25	629.5	1615
61.6	8	600.5	300
61.6	12	600.5	192
61.6	10	600.5	239.5
61.6	26	600.5	47.5
61.6	6	600.5	384.5
61.6	6	600.5	384.5
61.6	2.5	600.5	772.5
61.6	2	600.5	904.5
61.6	1	600.5	1261.5
61.6	3	600.5	671.5
61.6	0.75	600.5	1392.5
61.6	10	600.5	239.5
61.6	10	600.5	239.5
61.6	1	600.5	1261.5
61.6	2.5	600.5	772.5
61.6	2	600.5	904.5
61.6	1.5	600.5	1076.5
61.6	7.5	600.5	327
61.6	7	600.5	354.5
61.6	9	600.5	279
61.6	1	600.5	1261.5
61.6	0.75	600.5	1392.5
61.6	4	600.5	544.5
61.6	12	600.5	192
61.6	1	600.5	1261.5
61.6	5	600.5	450
61.6	0.75	600.5	1392.5
61.6	2.5	600.5	772.5
61.6	0.75	600.5	1392.5
61.6	1	600.5	1261.5
61.6	0.75	600.5	1392.5
61.6	12	600.5	192
61.6	0.25	600.5	1615
61.6	2.5	600.5	772.5
61.6	5	600.5	450
61.6	5	600.5	450
61.6	2.5	600.5	772.5
61.6	2.5	600.5	772.5
61.6	10	600.5	239.5
61.6	3	600.5	671.5
61.6	0.5	600.5	1494
61.6	2.5	600.5	772.5
61.6	5	600.5	450
61.6	1	600.5	1261.5
64.7	6	545.5	384.5
64.7	5	545.5	450
64.7	20	545.5	79.5
64.7	6	545.5	384.5
64.7	5	545.5	450
64.7	16	545.5	105
64.7	12.5	545.5	172.5
64.7	20	545.5	79.5
64.7	12.5	545.5	172.5
64.7	7	545.5	354.5
64.7	2.5	545.5	772.5
64.7	12.5	545.5	172.5
64.7	7	545.5	354.5
64.7	3	545.5	671.5
64.7	9	545.5	279
64.7	15	545.5	127.5
64.7	8	545.5	300
64.7	5	545.5	450
64.7	14	545.5	152
64.7	6	545.5	384.5
64.7	12.5	545.5	172.5
64.7	4	545.5	544.5
64.7	2.5	545.5	772.5
64.7	0.5	545.5	1494
64.7	7.5	545.5	327
64.7	20	545.5	79.5
64.7	1.5	545.5	1076.5
64.7	10	545.5	239.5
64.7	7	545.5	354.5
64.7	2.5	545.5	772.5
64.7	10	545.5	239.5
64.7	1	545.5	1261.5
64.7	1	545.5	1261.5
64.7	8	545.5	300
64.7	2	545.5	904.5
64.7	2	545.5	904.5
64.7	7	545.5	354.5
64.7	7	545.5	354.5
64.7	4	545.5	544.5
64.7	7	545.5	354.5
64.7	3	545.5	671.5
64.7	6	545.5	384.5
64.7	7	545.5	354.5
64.7	4	545.5	544.5
64.7	8	545.5	300
64.7	2	545.5	904.5
64.7	4	545.5	544.5
64.7	4.5	545.5	499.5
64.7	2	545.5	904.5
64.7	1	545.5	1261.5
64.7	4	545.5	544.5
64.7	1	545.5	1261.5
64.7	3	545.5	671.5
64.7	2	545.5	904.5
64.7	5	545.5	450
64.7	2	545.5	904.5
64.7	2	545.5	904.5
64.7	0.5	545.5	1494
64.7	2	545.5	904.5
64.7	4	545.5	544.5
64.7	2	545.5	904.5
64.7	2	545.5	904.5
64.7	3	545.5	671.5
64.7	3	545.5	671.5
64.7	1	545.5	1261.5
64.7	1	545.5	1261.5
66	1	475	1261.5
66	2	475	904.5
66	0.75	475	1392.5
66	2	475	904.5
66	20	475	79.5
66	0.45	475	1537
66	0.45	475	1537
66	0.35	475	1566.5
66	0.35	475	1566.5
66	0.25	475	1615
66	0.25	475	1615
66	0.1	475	1660.5
66	0.25	475	1615
66	0.25	475	1615
66	0.25	475	1615
66	0.25	475	1615
66	8	475	300
66	2	475	904.5
66	10	475	239.5
66	15	475	127.5
66	10	475	239.5
66	1.25	475	1141.5
66	1	475	1261.5
66	0.8	475	1361.5
66	1	475	1261.5
66	0.25	475	1615
66	0.6	475	1437.5
66	0.25	475	1615
66	0.25	475	1615
66	1.5	475	1076.5
66	1	475	1261.5
66	0.5	475	1494
66	0.5	475	1494
66	1	475	1261.5
66	0.5	475	1494
66	0.5	475	1494
66	1.25	475	1141.5
66	1	475	1261.5
66	2.25	475	811
66	1	475	1261.5
66	1	475	1261.5
66	0.35	475	1566.5
66	0.4	475	1551.5
66	2.25	475	811
66	1.75	475	1009.5
66	2	475	904.5
66	2	475	904.5
66	4.5	475	499.5
66	5.5	475	403
66	10	475	239.5
66	1.25	475	1141.5
66	9	475	279
66	7.5	475	327
66	3.5	475	596.5
66	1.5	475	1076.5
66	1.5	475	1076.5
66	0.5	475	1494
66	0.1	475	1660.5
66	0.1	475	1660.5
66	0.1	475	1660.5
66	15	475	127.5
66	12.5	475	172.5
66	5	475	450
66	6	475	384.5
66	3	475	671.5
66	0.25	475	1615
66	1	475	1261.5
66	0.4	475	1551.5
66	1.25	475	1141.5
66	0.8	475	1361.5
66	0.3	475	1580
66	0.15	475	1655.5
66	1.25	475	1141.5
66	1.25	475	1141.5
66	2.5	475	772.5
98	1	431.5	1261.5
98	0.6	431.5	1437.5
98	0.4	431.5	1551.5
98	0.4	431.5	1551.5
98	0.5	431.5	1494
98	0.5	431.5	1494
98	0.25	431.5	1615
98	0.4	431.5	1551.5
98	0.2	431.5	1645.5
98	0.2	431.5	1645.5
98	0.4	431.5	1551.5
98	0.7	431.5	1419.5
100	3	386	671.5
100	6	386	384.5
100	4.5	386	499.5
100	3	386	671.5
100	5.5	386	403
100	5	386	450
100	5	386	450
100	2.5	386	772.5
100	2.5	386	772.5
100	2.5	386	772.5
100	4	386	544.5
100	3	386	671.5
100	5.5	386	403
100	7	386	354.5
100	3	386	671.5
100	3	386	671.5
100	3.75	386	584
100	2	386	904.5
100	1.5	386	1076.5
100	2	386	904.5
100	1	386	1261.5
100	2	386	904.5
100	3.5	386	596.5
100	1	386	1261.5
100	3	386	671.5
100	4	386	544.5
100	2	386	904.5
100	3	386	671.5
100	3	386	671.5
100	5	386	450
100	3.5	386	596.5
100	0.25	386	1615
100	2.5	386	772.5
100	22.2	386	58
100	0.25	386	1615
100	0.25	386	1615
100	1.5	386	1076.5
100	3	386	671.5
100	3	386	671.5
100	0.75	386	1392.5
100	2	386	904.5
100	11	386	203
100	1.5	386	1076.5
100	3	386	671.5
100	1.5	386	1076.5
100	3	386	671.5
100	6	386	384.5
100	2.5	386	772.5
100	2.5	386	772.5
100	2.5	386	772.5
100	5	386	450
100	1	386	1261.5
100	5	386	450
100	0.55	386	1451.5
100	2.45	386	803
100	3	386	671.5
100	2.5	386	772.5
100	2	386	904.5
100	9	386	279
100	0.5	386	1494
100	1	386	1261.5
100	1.5	386	1076.5
100	3	386	671.5
100	0.7	386	1419.5
100	0.7	386	1419.5
100	0.7	386	1419.5
100	2.4	386	805.5
100	2	386	904.5
100	2.25	386	811
100	0.25	386	1615
100	2.25	386	811
100	1.75	386	1009.5
100	3.75	386	584
100	1.5	386	1076.5
100	1.5	386	1076.5
100	1.5	386	1076.5
100	2.5	386	772.5
100	3	386	671.5
100	0.75	386	1392.5
145.5	1.5	341.5	1076.5
145.5	1	341.5	1261.5
145.5	0.5	341.5	1494
145.5	0.75	341.5	1392.5
145.5	0.75	341.5	1392.5
145.5	0.5	341.5	1494
145.5	0.5	341.5	1494
145.5	0.25	341.5	1615
145.5	0.25	341.5	1615
145.5	0.25	341.5	1615
166.3	0.2	284.5	1645.5
166.3	4	284.5	544.5
166.3	0.6	284.5	1437.5
166.3	1	284.5	1261.5
166.3	1	284.5	1261.5
166.3	1	284.5	1261.5
166.3	0.6	284.5	1437.5
166.3	1.5	284.5	1076.5
166.3	2	284.5	904.5
166.3	4	284.5	544.5
166.3	1.5	284.5	1076.5
166.3	1	284.5	1261.5
166.3	1.2	284.5	1161
166.3	2.2	284.5	815.5
166.3	0.75	284.5	1392.5
166.3	0.75	284.5	1392.5
166.3	0.75	284.5	1392.5
166.3	1.5	284.5	1076.5
166.3	1.2	284.5	1161
166.3	0.2	284.5	1645.5
166.3	0.2	284.5	1645.5
166.3	0.2	284.5	1645.5
166.3	1.5	284.5	1076.5
166.3	0.3	284.5	1580
166.3	0.3	284.5	1580
166.3	1.5	284.5	1076.5
166.3	0.25	284.5	1615
166.3	1	284.5	1261.5
166.3	1	284.5	1261.5
166.3	0.3	284.5	1580
166.3	1.25	284.5	1141.5
166.3	4.5	284.5	499.5
166.3	0.3	284.5	1580
166.3	0.8	284.5	1361.5
166.3	0.2	284.5	1645.5
166.3	1.5	284.5	1076.5
166.3	0.5	284.5	1494
166.3	0.4	284.5	1551.5
166.3	0.2	284.5	1645.5
166.3	0.4	284.5	1551.5
166.3	0.5	284.5	1494
166.3	0.8	284.5	1361.5
166.3	1.5	284.5	1076.5
166.3	0.8	284.5	1361.5
166.3	1	284.5	1261.5
166.3	2	284.5	904.5
166.3	0.8	284.5	1361.5
166.3	0.3	284.5	1580
166.3	0.5	284.5	1494
166.3	1.2	284.5	1161
166.3	1.75	284.5	1009.5
166.3	1	284.5	1261.5
166.3	0.25	284.5	1615
166.3	0.25	284.5	1615
166.3	0.25	284.5	1615
166.3	0.25	284.5	1615
166.3	0.5	284.5	1494
166.3	0.5	284.5	1494
166.3	0.2	284.5	1645.5
166.3	0.5	284.5	1494
166.3	0.3	284.5	1580
166.3	0.3	284.5	1580
166.3	0.5	284.5	1494
166.3	0.5	284.5	1494
166.3	1.2	284.5	1161
166.3	0.25	284.5	1615
166.3	0.25	284.5	1615
166.3	1	284.5	1261.5
166.3	0.75	284.5	1392.5
166.3	0.75	284.5	1392.5
166.3	0.25	284.5	1615
166.3	0.75	284.5	1392.5
166.3	0.25	284.5	1615
166.3	0.25	284.5	1615
166.3	2.5	284.5	772.5
166.3	3.5	284.5	596.5
166.3	2.5	284.5	772.5
166.3	1	284.5	1261.5
166.3	1.5	284.5	1076.5
166.3	1.1	284.5	1176
166.3	0.9	284.5	1346
166.3	1.5	284.5	1076.5
166.3	1	284.5	1261.5
166.3	3	284.5	671.5
166.3	0.75	284.5	1392.5
166.3	0.75	284.5	1392.5
166.3	0.15	284.5	1655.5
166.3	0.25	284.5	1615
166.3	0.15	284.5	1655.5
166.3	0.4	284.5	1551.5
166.3	0.5	284.5	1494
166.3	0.5	284.5	1494
166.3	0.75	284.5	1392.5
166.3	0.15	284.5	1655.5
166.3	2	284.5	904.5
166.3	1.2	284.5	1161
166.3	0.8	284.5	1361.5
166.3	1.2	284.5	1161
166.3	2.7	284.5	740
166.3	2	284.5	904.5
166.3	2.5	284.5	772.5
166.3	5	284.5	450
166.3	0.25	284.5	1615
166.3	0.3	284.5	1580
168	45	123.5	7.5
168	22	123.5	60
168	16	123.5	105
168	25	123.5	52
168	27.5	123.5	46
168	30	123.5	39.5
168	12.5	123.5	172.5
168	12.5	123.5	172.5
168	10	123.5	239.5
168	5	123.5	450
168	5	123.5	450
168	42	123.5	9.5
168	9	123.5	279
168	12.5	123.5	172.5
168	6	123.5	384.5
168	12.5	123.5	172.5
168	15	123.5	127.5
168	13	123.5	158.5
168	13	123.5	158.5
168	13	123.5	158.5
168	10	123.5	239.5
168	10	123.5	239.5
168	10	123.5	239.5
168	10	123.5	239.5
168	10	123.5	239.5
168	10	123.5	239.5
168	10	123.5	239.5
168	40	123.5	14.5
168	40	123.5	14.5
168	40	123.5	14.5
168	8	123.5	300
168	12.5	123.5	172.5
168	12.5	123.5	172.5
168	1	123.5	1261.5
168	5	123.5	450
168	15	123.5	127.5
168	40	123.5	14.5
168	2.5	123.5	772.5
168	2.5	123.5	772.5
168	15	123.5	127.5
168	15	123.5	127.5
168	10	123.5	239.5
168	5	123.5	450
168	20	123.5	79.5
168	20	123.5	79.5
168	20	123.5	79.5
168	35	123.5	25.5
168	8	123.5	300
168	10	123.5	239.5
168	4	123.5	544.5
168	6	123.5	384.5
168	10	123.5	239.5
168	10	123.5	239.5
168	10	123.5	239.5
168	42	123.5	9.5
168	25	123.5	52
168	25	123.5	52
168	35	123.5	25.5
168	40	123.5	14.5
168	10	123.5	239.5
168	10	123.5	239.5
168	20	123.5	79.5
168	20	123.5	79.5
168	7.5	123.5	327
168	5	123.5	450
168	45	123.5	7.5
168	3	123.5	671.5
168	2	123.5	904.5
168	13	123.5	158.5
168	13	123.5	158.5
168	7	123.5	354.5
168	7	123.5	354.5
168	7	123.5	354.5
168	15	123.5	127.5
168	15	123.5	127.5
168	15	123.5	127.5
168	10	123.5	239.5
168	20	123.5	79.5
168	8	123.5	300
168	16	123.5	105
168	5	123.5	450
168	8	123.5	300
168	55	123.5	3.5
168	50	123.5	5.5
168	35	123.5	25.5
168	55	123.5	3.5
168	20	123.5	79.5
168	40	123.5	14.5
168	40	123.5	14.5
168	50	123.5	5.5
168	10	123.5	239.5
168	22.5	123.5	56.5
168	60	123.5	1.5
168	60	123.5	1.5
168	8	123.5	300
168	2.5	123.5	772.5
168	35	123.5	25.5
168	15	123.5	127.5
168	30	123.5	39.5
168	30	123.5	39.5
168	8	123.5	300
168	5	123.5	450
168	8	123.5	300
168	14	123.5	152
168	36	123.5	19
168	15	123.5	127.5
168	12.5	123.5	172.5
168	2.5	123.5	772.5
168	13	123.5	158.5
168	17	123.5	101.5
168	7.5	123.5	327
168	7.5	123.5	327
168	10	123.5	239.5
168	10	123.5	239.5
168	10	123.5	239.5
168	20	123.5	79.5
168	30	123.5	39.5
168	35	123.5	25.5
168	40	123.5	14.5
168	35	123.5	25.5
168	35	123.5	25.5
168	20	123.5	79.5
168	15	123.5	127.5
168	10	123.5	239.5
168	5	123.5	450
168	8	123.5	300
168	6	123.5	384.5
168	6	123.5	384.5
168	12	123.5	192
168	5.5	123.5	403
168	2	123.5	904.5
168	2	123.5	904.5
168	3	123.5	671.5
168	5	123.5	450
168	1.5	123.5	1076.5
168	2.5	123.5	772.5
168	7.5	123.5	327
168	2.5	123.5	772.5
168	2.5	123.5	772.5
168	12.5	123.5	172.5
168	7.5	123.5	327
168	5	123.5	450
168	7.5	123.5	327
168	2.5	123.5	772.5
168	12.5	123.5	172.5
168	5	123.5	450
168	12.5	123.5	172.5
168	20	123.5	79.5
168	20	123.5	79.5
168	22.5	123.5	56.5
168	7.5	123.5	327
168	10	123.5	239.5
168	10	123.5	239.5
168	20	123.5	79.5
168	7.5	123.5	327
168	15	123.5	127.5
168	15	123.5	127.5
168	7.5	123.5	327
168	15	123.5	127.5
168	3	123.5	671.5
168	10	123.5	239.5
168	2.5	123.5	772.5
168	20	123.5	79.5
168	20	123.5	79.5
168	20	123.5	79.5
168	20	123.5	79.5
168	15	123.5	127.5
168	12.5	123.5	172.5
168	8	123.5	300
168	2	123.5	904.5
168	2.5	123.5	772.5
168	8	123.5	300
168	7.5	123.5	327
168	7.5	123.5	327
168	5	123.5	450
168	12.5	123.5	172.5
168	5	123.5	450
168	10	123.5	239.5
168	12.5	123.5	172.5
168	15	123.5	127.5
168	5	123.5	450
168	2.5	123.5	772.5
168	17.5	123.5	99.5
168	17.5	123.5	99.5
168	15	123.5	127.5
168	10	123.5	239.5
168	10	123.5	239.5
168	10	123.5	239.5
168	10	123.5	239.5
168	10	123.5	239.5
168	10	123.5	239.5
168	10	123.5	239.5
168	8	123.5	300
168	2	123.5	904.5
168	5	123.5	450
168	12.5	123.5	172.5
168	7.5	123.5	327
168	4	123.5	544.5
168	12	123.5	192
168	20	123.5	79.5
168	10	123.5	239.5
168	10	123.5	239.5
168	2	123.5	904.5
168	2	123.5	904.5
168	6	123.5	384.5
168	6	123.5	384.5
168	8	123.5	300
168	2.5	123.5	772.5
168	15	123.5	127.5
168	10	123.5	239.5
168	8	123.5	300
168	7	123.5	354.5
168	5	123.5	450
168	12.5	123.5	172.5
168	11	123.5	203
168	8	123.5	300
168	10	123.5	239.5
168	12.5	123.5	172.5
540	0.5	7.5	1494
540	3.1	7.5	608
540	7	7.5	354.5
540	1	7.5	1261.5
540	4.5	7.5	499.5
540	4.4	7.5	506
540	1.2	7.5	1161
540	4.1	7.5	508
540	1.1	7.5	1176
540	0.9	7.5	1346
540	2.9	7.5	735
540	7.4	7.5	340
540	0.7	7.5	1419.5
540	5.5	7.5	403
	SPEAR	0.258922
	PEARS	0.239994
		13.4858
	2.06577e-39

## Sheet: Figure 6
GROUP 1						GROUP 2						GROUP 3
LENGTH	THICKNESS					LENGTH	THICKNESS					LENGTH	THICKNESS
0.5	3		GROUP 1			1	0.25		GROUP 2			10	25		GROUP 3
0.5	0.5		MEAN LENGTH	47.0357		2	0.75		MEAN LENGTH	153.065		10	35		MEAN LENGTH	232.831
0.5	0.75		MEAN THICKNESS	2.12912		2	0.25		MEAN THICKNESS	5.47749		10	40		MEAN THICKNESS	12.8511
1	1.5		MEDIAN LENGTH	14		2.5	0.25		MEDIAN LENGTH	60		10	35		MEDIAN LENGTH	120
1	0.75		MEDIAN THICKNESS	2		2.5	0.1		MEDIAN THICKNESS	3		20	10		MEDIAN THICKNESS	10
1.5	1					3	0.35					25	1
2	2					3	0.25					25	8
2	1.5					3.5	0.15					30	5
2	1.5					3.6	0.1					35	25
2	1.5					3.8	0.1					40	12.5
2	1					4	0.45					40	10
2	1					4	0.25					40	40
2	1.1					4	0.1					40	20
2.5	1.1					4.5	0.4					40	10
3	2					5	10.5					45	8
3	1.1					5	1					45	12.5
3.5	1.1					5	1.25					49	12.5
4	2					5	0.25					50	12.5
4	2					5	0.25					50	7.5
4	2					5	2					50	15
4	2					5	2					50	30
4	2					5	2					50	2
4	1.3					5	1.5					50	10
4	1.4					5	3.5					55	5
4	0.4					5	2					55	5
5	1					5	1.8					60	7
6	1.2					5	0.35					60	2.5
6	3					5	0.25					60	2.5
8	0.8					5	0.25					60	17.5
8	2					5	10					60	15
8	2					5	0.5					60	10
8.5	1					5.5	0.3					60	2
9	0.9					6	4					60	5
9	0.9					6	3					65	8
9	1					6	0.25					65	20
10	1.2					7	0.45					70	10
10	1.2					7	0.25					70	40
10	0.5					8	1.5					70	7
11	4.5					9	2					70	15
11.75	3					9	1					70	2
12	1.2					9	0.8					70	2.5
12	0.9					9	0.25					70	10
12	1.25					9	1.5					70	8
12	2					9	1.25					75	13
14	2					9.5	1.6					75	35
14	4					9.5	1					75	6
14	4					10	0.9					80	12.5
14	3					10	0.8					80	13
15	1.25					10	0.8					80	40
17	0.5					10	1.5					80	20
17	2					10	2					80	16
17	0.5					10.5	0.8					80	5
20	1.25					11	0.25					80	5
20	1.2					11	3					80	7.5
20	2					12	5					80	5
20	2					12	1.25					80	2.5
22	3					12	1					80	10
22.5	2					12	0.6					85	17.5
32	1.25					12	1.25					90	8
36	1.25					12	1.25					90	3
37.5	1					12	2.5					90	2.5
38	2					12.5	0.25					95	12.5
38	2					13	1.6					95	15
50	2					13	1					100	10
50	3					14	3.5					100	5
50	2					15	2					100	5
80	3					15	1					100	10
90	1.5					15	10					100	1.5
95	2.5					15	10					100	20
95	2.5					15	1.75					100	5
95	2.5					15	1.75					100	12.5
96	1					16	3					100	15
100	2					16	3					100	10
100	2					16	4					100	10
100	2.5					16	5					100	8
115	2.5					16	5					100	2.5
148	3					16	4					105	7.5
148	3					18	1.5					110	10
150	2					18	2					110	5
150	2					19	2.25					115	6
150	2					20	1					115	8
150	3					21	1.2					120	40
160	3					22	2					120	3
160	2.5					22	6					120	15
160	14					23	2					120	17
160	14					23	3.75					120	20
170	2.5					24	3					120	22.5
170	2.5					25	0.5					120	2.5
185	4					25	2					120	20
185	4					25	8					120	10
250	2					25	22					120	12.5
						25	20					130	35
						25	0.75					130	7
						25	5					130	15
						26	4					130	5
						26	1.2					135	13
						26	2.6					135	10
						26	2.8					135	10
						26	0.25					140	2.5
						26	0.25					140	20
						26	0.25					140	20
						26	1.6					140	15
						26	1.6					140	8
						26	0.6					140	12.5
						26	6					145	2
						26	5					150	12.5
						26	7					150	2
						27	8					150	7.5
						28	5					160	6
						29	3					160	7.5
						29	30					170	13
						29	2.25					170	7.5
						30	5					185	7.5
						30	5					190	25
						30	3					190	12.5
						30	3					190	12.5
						30	4					190	4
						30	1					190	8
						30	10					200	15
						30	2.25					200	10
						30	1					200	5
						30	4					200	2
						30	1					210	10
						32	6					220	10
						33	1.75					220	13
						34	10					220	7.5
						35	7.5					235	20
						35	3					240	9
						35	5					240	12.5
						35	26					260	16
						35	12					260	13
						35	2.5					260	20
						40	7.5					260	8
						40	5					265	2.5
						40	5					270	5
						40	1.5					270	10
						40	3					280	3
						40	1					280	10
						40	4					295	7
						40	4					295	11
						40	1					300	7.5
						40	0.75					300	12
						40	4					310	2
						40	4					310	12
						40	4					315	10
						40	2					320	15
						40	2					340	15
						40	1					340	12.5
						40	29					340	7.5
						40	4					380	22
						40	1					380	42
						40	8					380	12.5
						40	10					410	10
						40	5					430	6
						42	6					450	10
						42	5					450	42
						42	0.5					450	10
						42	1					450	20
						42	1.5					460	45
						42	3					470	10
						44	12					490	5.5
						45	2.5					500	7.5
						45	2					530	10
						45	15					600	10
						47	4					600	14
						50	10					600	36
						50	3					600	15
						50	3					640	7.5
						50	2					665	10
						50	7.5					680	12.5
						50	2					680	20
						50	2					690	10
						50	1					850	45
						50	10					850	20
						50	1					900	27.5
						50	1					1150	6
						50	0.75					2300	15
						50	0.75					4200	30
						50	6
						55	10
						55	5
						55	2.5
						55	7.5
						55	1
						55	4
						55	10
						55	3
						55	3
						60	8
						60	15
						60	5
						60	5
						60	15
						60	4
						60	1
						60	2
						60	2
						60	1.5
						60	35
						60	11
						60	5
						60	15
						60	5
						60	1
						60	5
						65	5
						65	15
						65	5
						65	7
						67	10
						67	2.5
						67	2
						67	5
						70	2.5
						70	2
						70	3
						70	6
						75	15
						75	17
						75	25
						75	5
						75	25
						75	3
						75	3
						75	3.5
						76	5
						80	12
						80	2
						80	2
						80	1
						80	2
						80	1
						80	1.5
						80	1
						80	12.5
						85	5
						85	12
						85	20
						85	1.75
						90	1
						90	4
						90	6
						90	2
						90	9
						90	9
						90	12
						90	1
						90	2.5
						90	0.75
						90	15
						100	10
						100	1
						100	3
						100	2
						100	5
						100	1
						100	2
						100	4
						100	3
						100	1
						100	2
						100	2
						100	2
						100	2
						100	10
						100	1
						100	7.5
						105	8
						110	15
						110	2
						110	3
						117	4
						120	1
						120	6
						120	4
						120	5
						120	2
						120	10
						120	15
						120	10
						120	0.75
						120	12
						120	20
						125	5
						130	2
						130	15
						130	6
						140	1
						140	12
						140	10
						140	2
						150	10
						160	2
						160	2
						160	4
						160	1
						160	0.75
						160	4
						160	0.75
						160	1
						160	20
						170	5
						170	25
						170	3
						170	1.25
						170	1.75
						175	1.75
						180	3
						180	1
						180	1
						180	1
						180	10
						180	12
						180	2
						182	1.5
						190	5
						209	5
						209	5
						209	5
						210	3
						210	5
						210	7
						214	1
						220	2.5
						230	5
						230	8
						230	2
						230	2
						240	2
						250	15
						260	4
						260	20
						260	18
						270	30
						275	5
						275	7
						280	1
						290	2
						290	2
						300	35
						300	5
						325	5
						330	3
						358	4.5
						360	15
						370	35
						395	3
						400	35
						430	3
						430	3
						430	8
						430	4
						435	7
						440	6
						450	6
						450	3
						450	6
						450	3
						475	15
						475	25
						490	2
						490	4
						490	6
						490	5
						500	35
						502	7.5
						661	16
						670	6.25
						837	14
						1322	30
						1322	14
						1449	28.75
						1449	14.75
						1566	7.5
						1616	3.75
						1616	3.75
						1800	12
						1800	12
						1800	7.5
						1800	3.75
						1800	8.75
						1800	2.5

## Sheet: Figure 7
ALL INTERDUNES													WET INTERDUNES ONLY													DAMP INTERDUNES ONLY												DRY INTERDUNES ONLY
Group 1	Group 2	Group 3											GROUP 1	GROUP 2	GROUP 3											GROUP 1	GROUP2	GROUP 3										GROUP 1	GROUP 2	GROUP 3
0.5	10	1		Anova: Single Factor									0.5	0.5	1		Anova: Single Factor									0.2	1	0.4	Anova: Single Factor									0.5	10
0.4	1	0.1											0.4	0.5	0.1											0.5	2	0.2										1.4	0.5		Anova: Single Factor
0.2	2	0.25		SUMMARY									0.2	0.25	0.25		SUMMARY									0.25	1	0.2	SUMMARY									1	0.5
0.1	1	0.1		Groups	Count	Sum	Average	Variance					0.1	0.25	0.1		Groups	Count	Sum	Average	Variance					0.5	1		Groups	Count	Sum	Average	Variance					0.5	0.4		SUMMARY
0.1	1	0.5		Group 1	115	68.55	0.596087	1.19684					0.1	0.25	0.5		GROUP 1	37	16.15	0.436486	0.159951					0.4	1		GROUP 1	70	48.5	0.692857	1.8458					0.2	2		Groups	Count	Sum	Average	Variance
0.1	1	0.4		Group 2	148	166.325	1.12382	4.41356					0.1	2	0.4		GROUP 2	50	52.55	1.051	4.40699					0.25	0.5		GROUP2	48	38.25	0.796875	1.21483						2		GROUP 1	5	3.6	0.72	0.227
0.5	0.5	0.15		Group 3	37	9.45	0.255405	0.0420533					0.5	0.75	0.15		GROUP 3	34	8.65	0.254412	0.0450557					4	0.5		GROUP 3	3	0.8	0.266667	0.0133333						1.5		GROUP 2	44	59.525	1.35284	6.67289
0.2	0.5	0.2											0.2	0.5	0.2											3	0.5												2.5
0.1	0.5	0.25											0.1	2	0.25											0.2	1												1.4
1.2	1	0.5		ANOVA									1.2	0.1	0.5		ANOVA									0.1	1		ANOVA										2.75		ANOVA
0.25	1	0.25		Source of Variation	SS	df	MS	F	P-value	F crit			0.25	0.5	0.25		Source of Variation	SS	df	MS	F	P-value	F crit			0.15	1		Source of Variation	SS	df	MS	F	P-value	F crit				2		Source of Variation	SS	df	MS	F	P-value	F crit
0.2	1	0.15		Between Groups	31.2119	2	15.606	5.89132	0.00309658	3.02615			0.2	1.5	0.15		Between Groups	15.0335	2	7.51675	3.97413	0.0213648	3.07309			0.15	1		Between Groups	0.950245	2	0.475123	0.303899	0.738511	3.07309				1		Between Groups	1.79811	1	1.79811	0.293602	0.590481	4.0471
0.5	1	0.15		Within Groups	786.747	297	2.64898						0.5	2.5	0.15		Within Groups	223.188	118	1.89142						0.15	0.5		Within Groups	184.484	118	1.56342							0.2		Within Groups	287.842	47	6.12431
0.15	0.5	0.15											0.15	0.25	0.15											0.1	0.5												0.2
0.2	0.5	0.5		Total	817.959	299							0.1	0.2	0.5		Total	238.221	120							0.15	1		Total	185.434	120								0.1		Total	289.641	48
0.5	1	0.5											0.1	0.2	0.5											0.05	0.5												0.1
0.25	0.5	0.25		t-Test: Two-Sample Assuming Equal Variances									0.15	0.2	0.25		BONFERONNI	0.0640945								0.1	0.5		BONFERONNI	2.21553									0.2		BONFERRONI =	1.77144
0.5	0.5	0.05											0.05	0.1	0.05											0.15	0.5												0.1
0.4	0.5	0.15			Group 1	Group 2		Bonferroni Correction		0.0225626			0.05	1.5	0.15											0.075	1			GROUP 1	GROUP 2	GROUP 3							0.2			GROUP 1	GROUP 2	GROUP 3
0.25	1	0.15		Mean	0.596087	1.12382							0.5	1	0.15											0.075	0.5		MEDIAN	0.275	0.5	0.2							0.25		MEDIAN	0.5	0.2
4	0.5	0.05		Variance	1.19684	4.41356							1	0.1	0.05											0.05	0.75		STDEV	1.3586	1.10219	0.11547							0.15		ST.DEV	0.476445	2.58319
3	0.5	0.05		Observations	115	148							0.8	5	0.05											0.05	0.2												0.05
0.2	0.5	0.05		Pooled Variance	3.00856								0.25	7.5	0.05											0.05	0.3												0.05
0.1	0.25	0.4		Hypothesized Mean Difference	0								0.6	0.4	0.4											0.05	0.3												0.1
0.15	0.25	0.05		df	261								1.2	1	0.05											0.05	0.9												0.2
0.15	0.25	0.15		t Stat	-2.44757								1.3	1.2	0.15											0.05	0.6												0.15
0.15	2	0.1		P(T<=t) one-tail	0.00752087								0.25	2.1	0.1											0.25	7.5												0.01
0.1	0.75	0.75		t Critical one-tail	1.65071								0.25	0.3	0.75											1	0.5												0.04
0.15	0.2	0.35		P(T<=t) two-tail	0.0150417								0.1	0.3	0.35											2.2	0.5												0.2
0.05	0.3	0.25		t Critical two-tail	1.96909								0.1	0.3	0.25											1	0.5												0.2
0.1	0.3	0.15											0.8	0.3	0.15											3.5	0.5												0.075
0.15	0.9	0.15		t-Test: Two-Sample Assuming Equal Variances									0.8	0.3	0.15											0.25	0.1												0.05
0.075	0.6	0.15											0.5	4	0.15											0.15	0.1												0.3
0.075	7.5	0.25			Group 2	Group 3		Bonferroni Correction		0.0196066			1.2	12	0.25											0.8	0.25												0.1
0.05	0.5	0.4		Mean	1.12382	0.255405							1.25	0.1												0.25	0.25												0.6
0.05	0.5	0.2		Variance	4.41356	0.0420533							0.15	0.05												0.1	0.25												0.15
0.05	0.5	0.2		Observations	148	37							0.15	0.15												0.2	0.2												0.9
0.05	0.5			Pooled Variance	3.55359									0.1												0.1	0.2												0.15
0.05	0.1			Hypothesized Mean Difference	0									0.15												1.1	0.2												0.15
0.05	0.1			df	183									0.1												0.75	0.2												2
0.1	0.25			t Stat	2.50633									0.2												0.75	0.25												1
0.1	0.25			P(T<=t) one-tail	0.00653552									0.15												0.5	0.25												12
0.15	0.25			t Critical one-tail	1.65322									0.1												0.6	0.25												7
0.05	0.2			P(T<=t) two-tail	0.013071									0.1												0.3	0.1												6
0.05	0.2			t Critical two-tail	1.97301									0.15												0.15	1
0.25	0.2													0.5												0.15	1.6
1	0.2													0.5												0.15	2
2.2	0.25			t-Test: Two-Sample Assuming Equal Variances										0.25												0.25	2
1	0.25													0.05												0.75
3.5	0.25				Group 3	Group1		Bonferroni Correction		0.0931616				0.05												0.3
0.25	0.5			Mean	0.255405	0.596087																				0.15
0.15	0.5			Variance	0.0420533	1.19684																				0.5
0.8	0.4			Observations	37	115																				0.5		Anova: Single Factor
0.25	2			Pooled Variance	0.919689																					0.6
0.1	2			Hypothesized Mean Difference	0																					0.6		SUMMARY
0.2	1.5			df	150																					0.4		Groups
0.1	0.75			t Stat	-1.87956																					0.2		GROUP 1
1.1	0.5			P(T<=t) one-tail	0.0310539																					0.6		GROUP2
0.75	2			t Critical one-tail	1.65508																					2		GROUP 3
0.75	0.1			P(T<=t) two-tail	0.0621077																					0.75
0.5	0.5			t Critical two-tail	1.97591																					0.3
0.6	1.5																									0.3		ANOVA
0.3	2.5																									1.2		Source of Variation
0.15	0.25																									1		Between Groups
0.15	0.2			Group 1 median		0.25																				1		Within Groups
0.15	0.2			Group 2 median		0.5																				10
0.25	0.2			Group 3 median		0.2																				0.5		Total
0.75	2.5																									0.75
0.3	1.4			Group 1 St.Dev		1.094																				0.25
0.15	2.75			Group 2 St.Dev		2.10085																				0.5
0.5	2			Group 3 St.Dev		0.205069
0.5	1
0.6	0.2
0.6	0.1
0.4	1.5
0.2	1
0.5	0.1
1	0.2
0.8	0.1
0.25	0.1
0.6	0.2
1.2	0.1
1.3	0.2
0.25	0.25
0.25	0.15
0.1	0.05
0.1	0.05
0.8	0.1
0.8	0.2
0.5	0.15
1.2	0.01
1.25	0.04
0.15	0.2
0.15	0.2
0.6	0.075
2	0.05
0.75	0.3
0.3	0.1
0.3	0.6
1.2	0.15
1	0.9
0.1	0.15
0.1	0.15
0.1	2
1	1
0.5	12
1.4	7
1	6
0.5	5
0.2	7.5
10	0.1
0.5	1
0.75	1.6
0.25	0.4
0.5	1
	1.2
	2.1
	0.3
	0.3
	0.3
	0.3
	0.3
	10
	4
	12
	0.1
	0.05
	0.15
	0.1
	0.15
	0.1
	0.2
	0.15
	0.1
	0.1
	0.15
	0.5
	0.5
	0.25
	0.05
	0.05
	2
	2
	0.5
	0.5
	1
	2
	2

## Sheet: Figure 9
GROUP 1					GROUP 2					GROUP 3
aeolian	non_aeolian	thickness			aeolian	non_aeolian	thickness			aeolian	non_aeolian	thickness		Group 1	count	percentage
\N	alluvial_conglomerate	3			\N	alluvial_conglomerate	8			\N	fluvial_channel	0.75		Aeolian	690	68.7251			Group 1	count	percentage
\N	alluvial_conglomerate	0.8			\N	alluvial_conglomerate	7			\N	fluvial_channel	0.5		Non-Aeolian	314	31.2749			fluvial/alluvial	172	54.7771
\N	alluvial_conglomerate	0.8			\N	alluvial_conglomerate	7			\N	fluvial_channel	1							marine	81	25.7962
\N	alluvial_conglomerate	0.5			\N	alluvial_conglomerate	38			\N	fluvial_channel	0.5		Group 2	count	percentage			lacustrine	6	1.91083
\N	alluvial_conglomerate	0.5			\N	alluvial_conglomerate	15			\N	fluvial_channel	0.75		Aeolian	1351	60.3394			sabkha		0
\N	alluvial_conglomerate,alluvial_sandstone_or_siltstone	3.5			\N	alluvial_conglomerate	30			\N	fluvial_channel	1		Non-Aeolian	888	39.6606			paleosol	39	12.4204
\N	alluvial_conglomerate,alluvial_sandstone_or_siltstone	1.2			\N	alluvial_conglomerate	0.8			\N	fluvial_channel	0.6							igneous	16	5.09554
\N	alluvial_sandstone_or_siltstone	0.2			\N	alluvial_conglomerate	0.15			\N	fluvial_channel	0.6		Group 3	count	percentage
\N	alluvial_sandstone_or_siltstone	0.1			\N	alluvial_conglomerate	0.15			\N	fluvial_channel	0.5		Aeolian	143	26.9811
\N	alluvial_sandstone_or_siltstone	0.3			\N	alluvial_conglomerate	0.4			\N	fluvial_channel	0.5		Non-Aeolian	387	73.0189			Group 2	count	percentage
\N	alluvial_sandstone_or_siltstone	8.15			\N	alluvial_conglomerate	0.2			\N	fluvial_channel	0.25							fluvial/alluvial	650	73.5294
\N	alluvial_sandstone_or_siltstone	4			\N	alluvial_conglomerate	25			\N	fluvial_channel	0.5							marine	84	9.50226
\N	alluvial_sandstone_or_siltstone	1			\N	alluvial_conglomerate	2.5			\N	fluvial_channel	0.4		Group 1	count	percentage			lacustrine	48	5.42986
\N	fluvial_channel	2			\N	alluvial_conglomerate	2			\N	fluvial_channel	0.1		dune-set	402	58.2609			sabkha	83	9.38914
\N	fluvial_channel	1.7			\N	alluvial_conglomerate	1			\N	fluvial_channel	0.1		sandsheet	173	25.0725			paleosol	17	1.92308
\N	fluvial_channel	2			\N	alluvial_conglomerate	5			\N	fluvial_channel	0.1		interdune	115	16.6667			igneous	2	0.226244
\N	fluvial_channel	5			\N	alluvial_conglomerate	4			\N	fluvial_channel	0.25
\N	fluvial_channel	4			\N	alluvial_conglomerate	2			\N	fluvial_channel	0.15		Group 2	count	percentage
\N	fluvial_channel	1.3			\N	alluvial_conglomerate	0.5			\N	fluvial_channel	0.2		dune-set	915	67.9792			Group 3	count	percentage
\N	fluvial_channel	1			\N	alluvial_conglomerate	1			\N	fluvial_channel	0.15		sandsheet	283	21.0253			fluvial/alluvial	129	89.5833
\N	fluvial_channel	0.5			\N	alluvial_conglomerate	10			\N	fluvial_channel	0.15		interdune	148	10.9955			marine	0	0
\N	fluvial_channel	0.6			\N	alluvial_conglomerate	17.5			\N	fluvial_channel	0.1							lacustrine	7	4.86111
\N	fluvial_channel	0.5			\N	alluvial_conglomerate	25			\N	fluvial_channel	0.2		Group 3	count	percentage			sabkha	0	0
\N	fluvial_channel	0.5			\N	alluvial_conglomerate	7.5			\N	fluvial_channel	0.15		dune-set	346	89.4057			paleosol	0	0
\N	fluvial_channel	0.5			\N	alluvial_conglomerate	3.5			\N	fluvial_channel	0.15		sandsheet	4	1.03359			igneous	8	5.55556
\N	fluvial_channel	0.5			\N	alluvial_conglomerate	3.5			\N	fluvial_channel	0.2		interdune	37	9.56072
\N	fluvial_channel	0.6			\N	alluvial_conglomerate	1			\N	fluvial_channel	0.2
\N	fluvial_channel	3			\N	alluvial_conglomerate	0.5			\N	fluvial_channel	0.2
\N	fluvial_channel	15			\N	alluvial_conglomerate	0.5			\N	fluvial_channel	0.2		Group 1	count	percentage
\N	fluvial_channel	13			\N	alluvial_conglomerate	3			\N	fluvial_channel	0.15		dry	8	6.95652
\N	fluvial_channel	8			\N	alluvial_conglomerate	3			\N	fluvial_channel	0.15		damp	70	60.8696
\N	fluvial_channel	2.5			\N	alluvial_conglomerate	8			\N	fluvial_channel	0.2		wet	37	32.1739
\N	fluvial_channel	0.5			\N	alluvial_conglomerate	3			\N	fluvial_channel	0.75
\N	fluvial_channel	2			\N	alluvial_conglomerate	2			\N	fluvial_channel	0.2		Group 2	count	percentage
\N	fluvial_channel	2			\N	alluvial_conglomerate	3			\N	fluvial_channel	0.2		dry	44	30.9859
\N	fluvial_channel	35			\N	alluvial_conglomerate	4			\N	fluvial_channel	0.15		damp	48	33.8028
\N	fluvial_channel	3			\N	alluvial_conglomerate	1			\N	fluvial_channel	0.1		wet	50	35.2113
\N	fluvial_channel	35			\N	alluvial_conglomerate	3			\N	fluvial_channel	0.1
\N	fluvial_channel	15			\N	alluvial_conglomerate	2			\N	fluvial_channel	0.1		Group 3	count	percentage
\N	fluvial_channel	5			\N	alluvial_conglomerate	1.5			\N	fluvial_channel	0.05		dry	0	0
\N	fluvial_channel	5			\N	alluvial_conglomerate	3			\N	fluvial_channel	0.5		damp	3	8.10811
\N	fluvial_channel	5			\N	alluvial_conglomerate	1			\N	fluvial_channel	0.6		wet	34	91.8919
\N	fluvial_channel	5			\N	alluvial_conglomerate	2			\N	fluvial_channel	0.5
\N	fluvial_channel,fluvial_sandstone	0.5			\N	alluvial_conglomerate	3			\N	fluvial_channel	2.1
\N	fluvial_channel,fluvial_sandstone	0.25			\N	alluvial_conglomerate	1			\N	fluvial_channel	0.5
\N	fluvial_channel,fluvial_sandstone	1.25			\N	alluvial_conglomerate	3			\N	fluvial_channel	0.15
\N	fluvial_channel,fluvial_sandstone	0.4			\N	alluvial_conglomerate	5			\N	fluvial_channel	0.15
\N	fluvial_channel,fluvial_sandstone	0.4			\N	alluvial_conglomerate	1			\N	fluvial_channel	0.2
\N	fluvial_channel,fluvial_sandstone	1			\N	alluvial_conglomerate	0.5			\N	fluvial_channel	3
\N	fluvial_channel,fluvial_sandstone	0.5			\N	alluvial_conglomerate	0.5			\N	fluvial_channel	4
\N	fluvial_channel,fluvial_sandstone	6			\N	alluvial_conglomerate	44			\N	fluvial_channel	4
\N	fluvial_channel,fluvial_sandstone	2			\N	alluvial_sandstone_or_siltstone	3			\N	fluvial_channel	0.3
\N	fluvial_channel,fluvial_sandstone	5			\N	alluvial_sandstone_or_siltstone	3			\N	fluvial_channel	0.9
\N	fluvial_channel,fluvial_sandstone	0.5			\N	chert	1.5			\N	fluvial_channel	0.2
\N	fluvial_channel,fluvial_sandstone	2			\N	coal	0.6			\N	fluvial_channel	0.7
\N	fluvial_channel,fluvial_sandstone	0.5			\N	fluvial_channel	1			\N	fluvial_channel	2.5
\N	fluvial_channel,fluvial_sandstone	4			\N	fluvial_channel	0.5			\N	fluvial_channel	0.2
\N	fluvial_channel,fluvial_sandstone	3.5			\N	fluvial_channel	0.5			\N	fluvial_sandstone	1.2
\N	fluvial_channel,fluvial_sandstone	5			\N	fluvial_channel	0.5			\N	fluvial_sandstone	3.8
\N	fluvial_channel,fluvial_sandstone	5			\N	fluvial_channel	0.5			\N	fluvial_sandstone	6
\N	fluvial_channel,fluvial_sandstone	5			\N	fluvial_channel	0.75			\N	fluvial_sandstone	0.8
\N	fluvial_channel,fluvial_sandstone	7.5			\N	fluvial_channel	0.75			\N	fluvial_sandstone	2
\N	fluvial_channel,fluvial_sandstone	3			\N	fluvial_channel	0.75			\N	fluvial_sandstone	2.6
\N	fluvial_channel,fluvial_sandstone	3			\N	fluvial_channel	1.5			\N	fluvial_sandstone	2
\N	fluvial_channel,fluvial_sandstone	0.2			\N	fluvial_channel	0.5			\N	fluvial_sandstone	2.2
\N	fluvial_channel,fluvial_sandstone	0.5			\N	fluvial_channel	0.5			\N	fluvial_sandstone	2.7
\N	fluvial_channel,fluvial_sandstone	1.25			\N	fluvial_channel	1.75			\N	igneous	105
\N	fluvial_channel,fluvial_sandstone	1.25			\N	fluvial_channel	2			\N	igneous	42
\N	fluvial_channel,fluvial_sandstone	0.25			\N	fluvial_channel	0.75			\N	igneous	7
\N	fluvial_channel,fluvial_sandstone	0.25			\N	fluvial_channel	0.75			\N	igneous	92
\N	fluvial_channel,fluvial_sandstone	1.5			\N	fluvial_channel	2.5			\N	igneous	100
\N	fluvial_channel,fluvial_sandstone	1.5			\N	fluvial_channel	6			\N	igneous	47.5
\N	fluvial_channel,fluvial_sandstone	0.25			\N	fluvial_channel	0.25			\N	igneous	60
\N	fluvial_channel,fluvial_sandstone	0.25			\N	fluvial_channel	0.25			\N	igneous	2.5
\N	fluvial_channel,fluvial_sandstone	0.25			\N	fluvial_channel	0.1			\N	lacustrine_siliciclastics	1
\N	fluvial_channel,fluvial_sandstone	0.25			\N	fluvial_channel	0.1			\N	lacustrine_siliciclastics	0.1
\N	fluvial_channel,fluvial_sandstone	0.5			\N	fluvial_channel	1.9			\N	lacustrine_siliciclastics	0.6
\N	fluvial_channel,fluvial_sandstone	0.1			\N	fluvial_channel	3			\N	lacustrine_siliciclastics	0.1
\N	fluvial_channel,fluvial_sandstone	0.3			\N	fluvial_channel	1			\N	lacustrine_siliciclastics	0.15
\N	fluvial_channel,fluvial_sandstone	0.25			\N	fluvial_channel	2			\N	lacustrine_siliciclastics	0.1
\N	fluvial_channel,fluvial_sandstone	0.25			\N	fluvial_channel	2			\N	lacustrine_siliciclastics	0.1
\N	fluvial_mudstone,fluvial_sandstone,non-channelized_fluvial_deposits	6			\N	fluvial_channel	4			\N	non-channelized_fluvial_deposits	0.75
\N	fluvial_mudstone,fluvial_sandstone,non-channelized_fluvial_deposits	1.5			\N	fluvial_channel	2			\N	non-channelized_fluvial_deposits	0.25
\N	fluvial_mudstone,fluvial_sandstone,non-channelized_fluvial_deposits	1.5			\N	fluvial_channel	0.6			\N	non-channelized_fluvial_deposits	0.15
\N	fluvial_mudstone,fluvial_sandstone,non-channelized_fluvial_deposits	4.5			\N	fluvial_channel	2.8			\N	non-channelized_fluvial_deposits	0.15
\N	fluvial_mudstone,fluvial_sandstone,non-channelized_fluvial_deposits	0.5			\N	fluvial_channel	28			\N	non-channelized_fluvial_deposits	0.15
\N	fluvial_mudstone,non-channelized_fluvial_deposits	1			\N	fluvial_channel	36			\N	non-channelized_fluvial_deposits	0.1
\N	fluvial_mudstone,non-channelized_fluvial_deposits	3			\N	fluvial_channel	20			\N	non-channelized_fluvial_deposits	0.15
\N	fluvial_mudstone,non-channelized_fluvial_deposits	1			\N	fluvial_channel	10			\N	non-channelized_fluvial_deposits	1
\N	fluvial_mudstone,non-channelized_fluvial_deposits	1.5			\N	fluvial_channel	7			\N	non-channelized_fluvial_deposits	0.4
\N	fluvial_mudstone,non-channelized_fluvial_deposits	2			\N	fluvial_channel	1			\N	non-channelized_fluvial_deposits	0.1
\N	fluvial_mudstone,non-channelized_fluvial_deposits	1.5			\N	fluvial_channel	1			\N	non-channelized_fluvial_deposits	0.15
\N	fluvial_mudstone,non-channelized_fluvial_deposits	3			\N	fluvial_channel	1.1			\N	non-channelized_fluvial_deposits	2
\N	fluvial_mudstone,non-channelized_fluvial_deposits	1			\N	fluvial_channel	1.1			\N	non-channelized_fluvial_deposits	1
\N	fluvial_mudstone,non-channelized_fluvial_deposits	2			\N	fluvial_channel	2.8			\N	non-channelized_fluvial_deposits	0.5
\N	fluvial_mudstone,non-channelized_fluvial_deposits	2.5			\N	fluvial_channel	1.5			\N	non-channelized_fluvial_deposits	1
\N	fluvial_mudstone,non-channelized_fluvial_deposits	3			\N	fluvial_channel	0.2			\N	non-channelized_fluvial_deposits	0.5
\N	fluvial_mudstone,non-channelized_fluvial_deposits	3			\N	fluvial_channel	0.8			\N	non-channelized_fluvial_deposits	1
\N	fluvial_mudstone,non-channelized_fluvial_deposits	0.75			\N	fluvial_channel	1			\N	non-channelized_fluvial_deposits	0.15
\N	fluvial_mudstone,non-channelized_fluvial_deposits	0.5			\N	fluvial_channel	1			\N	non-channelized_fluvial_deposits	1
\N	fluvial_mudstone,non-channelized_fluvial_deposits	6			\N	fluvial_channel	1			\N	non-channelized_fluvial_deposits	1
\N	fluvial_mudstone,non-channelized_fluvial_deposits	0.5			\N	fluvial_channel	1			\N	non-channelized_fluvial_deposits	1			464
\N	fluvial_mudstone,non-channelized_fluvial_deposits	0.5			\N	fluvial_channel	1.5			\N	non-channelized_fluvial_deposits	0.5			44
\N	fluvial_mudstone,non-channelized_fluvial_deposits	0.5			\N	fluvial_channel	1			\N	non-channelized_fluvial_deposits	0.25			456
\N	fluvial_mudstone,non-channelized_fluvial_deposits	1			\N	fluvial_channel	2			\N	non-channelized_fluvial_deposits	0.25
\N	fluvial_mudstone,non-channelized_fluvial_deposits	1			\N	fluvial_channel	3			\N	non-channelized_fluvial_deposits	0.2
\N	fluvial_mudstone,non-channelized_fluvial_deposits	1.5			\N	fluvial_channel	2.5			\N	non-channelized_fluvial_deposits	0.75
\N	fluvial_mudstone,non-channelized_fluvial_deposits	0.5			\N	fluvial_channel	3			\N	non-channelized_fluvial_deposits	0.75
\N	fluvial_mudstone,non-channelized_fluvial_deposits	5.5			\N	fluvial_channel	4			\N	non-channelized_fluvial_deposits	0.05
\N	fluvial_mudstone,non-channelized_fluvial_deposits	1			\N	fluvial_channel	1			\N	non-channelized_fluvial_deposits	0.05
\N	fluvial_mudstone,non-channelized_fluvial_deposits	0.5			\N	fluvial_channel	0.5			\N	non-channelized_fluvial_deposits	0.05
\N	fluvial_mudstone,non-channelized_fluvial_deposits	2.5			\N	fluvial_channel	0.3			\N	non-channelized_fluvial_deposits	0.05
\N	fluvial_mudstone,non-channelized_fluvial_deposits	1			\N	fluvial_channel	1.4			\N	non-channelized_fluvial_deposits	0.1
\N	fluvial_mudstone,non-channelized_fluvial_deposits	1.5			\N	fluvial_channel	0.25			\N	non-channelized_fluvial_deposits	0.1
\N	fluvial_mudstone,non-channelized_fluvial_deposits	2			\N	fluvial_channel	0.5			\N	non-channelized_fluvial_deposits	0.1
\N	fluvial_sandstone	0.3			\N	fluvial_channel	2			\N	non-channelized_fluvial_deposits	0.75
\N	fluvial_sandstone,non-channelized_fluvial_deposits	0.5			\N	fluvial_channel	1.75			\N	non-channelized_fluvial_deposits	0.2
\N	fluvial_sandstone,non-channelized_fluvial_deposits	0.25			\N	fluvial_channel	3.5			\N	non-channelized_fluvial_deposits	1.5
\N	fluvial_sandstone,non-channelized_fluvial_deposits	0.5			\N	fluvial_channel	3.5			\N	non-channelized_fluvial_deposits	0.1
\N	fluvial_sandstone,non-channelized_fluvial_deposits	0.25			\N	fluvial_channel	4			\N	non-channelized_fluvial_deposits	0.1
\N	fluvial_sandstone,non-channelized_fluvial_deposits	0.2			\N	fluvial_channel	1.5			\N	non-channelized_fluvial_deposits	0.2
\N	fluvial_sandstone,non-channelized_fluvial_deposits	0.2			\N	fluvial_channel	0.5			\N	non-channelized_fluvial_deposits	0.2
\N	fluvial_sandstone,non-channelized_fluvial_deposits	0.25			\N	fluvial_channel	1			\N	non-channelized_fluvial_deposits	0.75
\N	fluvial_sandstone,non-channelized_fluvial_deposits	0.75			\N	fluvial_channel	0.5			\N	non-channelized_fluvial_deposits	0.5
\N	fluvial_sandstone,non-channelized_fluvial_deposits	0.2			\N	fluvial_channel	1			\N	non-channelized_fluvial_deposits	0.5
\N	fluvial_sandstone,non-channelized_fluvial_deposits	0.25			\N	fluvial_channel	1			\N	non-channelized_fluvial_deposits	0.15
\N	fluvial_sandstone,non-channelized_fluvial_deposits	0.4			\N	fluvial_channel	0.5			\N	non-channelized_fluvial_deposits	0.5
\N	fluvial_sandstone,non-channelized_fluvial_deposits	0.25			\N	fluvial_channel	0.5			\N	non-channelized_fluvial_deposits	0.5
\N	fluvial_sandstone,non-channelized_fluvial_deposits	0.25			\N	fluvial_channel	0.5			\N	non-channelized_fluvial_deposits	0.1
\N	fluvial_sandstone,non-channelized_fluvial_deposits	0.1			\N	fluvial_channel	6			\N	non-channelized_fluvial_deposits	0.1
\N	fluvial_sandstone,non-channelized_fluvial_deposits	0.2			\N	fluvial_channel	0.2			\N	non-channelized_fluvial_deposits	0.15
\N	fluvial_sandstone,non-channelized_fluvial_deposits	0.25			\N	fluvial_channel	0.3			\N	non-channelized_fluvial_deposits	0.2
\N	fluvial_sandstone,non-channelized_fluvial_deposits	0.2			\N	fluvial_channel	0.45			\N	non-channelized_fluvial_deposits	0.15
\N	fluvial_sandstone,non-channelized_fluvial_deposits	0.2			\N	fluvial_channel	0.4			\N	non-channelized_fluvial_deposits	0.2
\N	fluvial_sandstone,non-channelized_fluvial_deposits	0.2			\N	fluvial_channel	0.2			\N	non-channelized_fluvial_deposits	0.15
\N	fluvial_sandstone,non-channelized_fluvial_deposits	0.2			\N	fluvial_channel	0.6			\N	non-channelized_fluvial_deposits	0.2
\N	fluvial_sandstone,non-channelized_fluvial_deposits	0.2			\N	fluvial_channel	0.2			\N	non-channelized_fluvial_deposits	0.15
\N	fluvial_sandstone,non-channelized_fluvial_deposits	0.75			\N	fluvial_channel	0.05			\N	non-channelized_fluvial_deposits	0.25
\N	fluvial_sandstone,non-channelized_fluvial_deposits	0.2			\N	fluvial_channel	0.05			\N	non-channelized_fluvial_deposits	0.3
\N	fluvial_sandstone,non-channelized_fluvial_deposits	0.25			\N	fluvial_channel	0.5			\N	non-channelized_fluvial_deposits	0.05
\N	fluvial_sandstone,non-channelized_fluvial_deposits	0.25			\N	fluvial_channel	0.1			\N	non-channelized_fluvial_deposits	0.1
\N	fluvial_sandstone,non-channelized_fluvial_deposits	0.25			\N	fluvial_channel	0.15			\N	non-channelized_fluvial_deposits	0.2
\N	fluvial_sandstone,non-channelized_fluvial_deposits	0.25			\N	fluvial_channel	0.1			\N	non-channelized_fluvial_deposits	0.2
\N	fluvial_sandstone,non-channelized_fluvial_deposits	0.25			\N	fluvial_channel	0.25			compound_set	\N	0.2
\N	fluvial_sandstone,non-channelized_fluvial_deposits	0.2			\N	fluvial_channel	0.05			compound_set	\N	4
\N	fluvial_sandstone,non-channelized_fluvial_deposits	0.2			\N	fluvial_channel	12			coset	\N	1.5
\N	fluvial_sandstone,non-channelized_fluvial_deposits	0.25			\N	fluvial_channel	2			coset	\N	1
\N	fluvial_sandstone,non-channelized_fluvial_deposits	0.3			\N	fluvial_channel	6			coset	\N	0.5
\N	fluvial_sandstone,non-channelized_fluvial_deposits	0.3			\N	fluvial_channel	4			coset	\N	0.6
\N	fluvial_sandstone,non-channelized_fluvial_deposits	0.3			\N	fluvial_channel	7			coset	\N	1
\N	fluvial_sandstone,non-channelized_fluvial_deposits	0.3			\N	fluvial_channel	2			coset	\N	1
\N	fluvial_sandstone,non-channelized_fluvial_deposits	0.5			\N	fluvial_channel	3			coset	\N	1
\N	fluvial_sandstone,non-channelized_fluvial_deposits	0.5			\N	fluvial_channel	12			coset	\N	0.6
\N	fluvial_sandstone,non-channelized_fluvial_deposits	0.2			\N	fluvial_channel	10			coset	\N	1.5
\N	fluvial_sandstone,non-channelized_fluvial_deposits	0.2			\N	fluvial_channel	12			coset	\N	2
\N	fluvial_sandstone,non-channelized_fluvial_deposits	0.1			\N	fluvial_channel	27			coset	\N	4
\N	fluvial_sandstone,non-channelized_fluvial_deposits	0.125			\N	fluvial_channel	10			coset	\N	1.5
\N	fluvial_sandstone,non-channelized_fluvial_deposits	0.125			\N	fluvial_channel	5			coset	\N	1
\N	igneous	10			\N	fluvial_channel	12			coset	\N	45
\N	igneous	100			\N	fluvial_channel	5			coset	\N	22
\N	igneous	15			\N	fluvial_channel	27			coset	\N	16
\N	igneous	35			\N	fluvial_channel	12			coset	\N	25
\N	igneous	35			\N	fluvial_channel	4			coset	\N	27.5
\N	igneous	35			\N	fluvial_channel	10			cross-strata_package	\N	30
\N	igneous	37			\N	fluvial_channel	5			cross-strata_package	\N	12.5
\N	igneous	25			\N	fluvial_channel	1			cross-strata_package	\N	12.5
\N	igneous	80			\N	fluvial_channel	10			cross-strata_package	\N	10
\N	igneous	10			\N	fluvial_channel	0.25			cross-strata_package	\N	5
\N	igneous	7			\N	fluvial_channel	0.5			cross-strata_package	\N	5
\N	igneous	15			\N	fluvial_channel	0.5			cross-strata_package	\N	42
\N	igneous	10			\N	fluvial_channel	0.5			cross-strata_package	\N	9
\N	igneous	20			\N	fluvial_channel	0.2			cross-strata_package	\N	12.5
\N	igneous	10			\N	fluvial_channel	0.2			cross-strata_package	\N	6
\N	igneous	20			\N	fluvial_channel	0.2			cross-strata_package	\N	12.5
\N	lacustine_carbonates,lacustrine_siliciclastics	3			\N	fluvial_channel	0.2			cross-strata_package	\N	15
\N	lacustine_carbonates,lacustrine_siliciclastics	0.1			\N	fluvial_channel	4.5			cross-strata_package	\N	13
\N	lacustrine_siliciclastics	5			\N	fluvial_channel	9			cross-strata_package	\N	13
\N	lacustrine_siliciclastics	5			\N	fluvial_channel	0.5			cross-strata_package	\N	13
\N	lacustrine_siliciclastics	8			\N	fluvial_channel	1.25			cross-strata_package	\N	10
\N	lacustrine_siliciclastics	15			\N	fluvial_channel	2			cross-strata_package	\N	10
\N	marine_carbonates	1.5			\N	fluvial_channel	0.35			cross-strata_package	\N	10
\N	marine_carbonates	2			\N	fluvial_channel	0.8			cross-strata_package	\N	10
\N	marine_carbonates	1.5			\N	fluvial_channel	0.6			cross-strata_package	\N	10
\N	marine_carbonates	1.5			\N	fluvial_channel	0.3			cross-strata_package	\N	10
\N	marine_carbonates	2			\N	fluvial_channel	0.25			cross-strata_package	\N	10
\N	marine_carbonates	4.5			\N	fluvial_channel	0.25			cross-strata_package	\N	40
\N	marine_carbonates	2			\N	fluvial_channel	0.5			cross-strata_package	\N	40
\N	marine_carbonates	2			\N	fluvial_channel	0.8			cross-strata_package	\N	40
\N	marine_carbonates	3			\N	fluvial_channel	0.5			cross-strata_package	\N	8
\N	marine_carbonates	1			\N	fluvial_channel	0.25			cross-strata_package	\N	12.5
\N	marine_carbonates	2			\N	fluvial_channel	0.7			cross-strata_package	\N	12.5
\N	marine_carbonates	1.5			\N	fluvial_channel	0.2			cross-strata_package	\N	1
\N	marine_carbonates	0.25			\N	fluvial_channel	0.5			cross-strata_package	\N	5
\N	marine_carbonates	3			\N	fluvial_channel	0.25			cross-strata_package	\N	15
\N	marine_carbonates	2			\N	fluvial_channel	0.5			cross-strata_package	\N	40
\N	marine_carbonates	2			\N	fluvial_channel	0.2			cross-strata_package	\N	2.5
\N	marine_carbonates	2			\N	fluvial_channel	0.1			cross-strata_package	\N	2.5
\N	marine_carbonates	4			\N	fluvial_channel	0.1			cross-strata_package	\N	15
\N	marine_siliciclastics	3.8			\N	fluvial_channel	0.25			cross-strata_package	\N	15
\N	marine_siliciclastics	2			\N	fluvial_channel	0.4			cross-strata_package	\N	10
\N	marine_siliciclastics	0.1			\N	fluvial_channel	0.5			cross-strata_package	\N	5
\N	marine_siliciclastics	0.05			\N	fluvial_channel	2			cross-strata_package	\N	20
\N	marine_siliciclastics	0.05			\N	fluvial_channel	0.5			cross-strata_package	\N	20
\N	marine_siliciclastics	0.05			\N	fluvial_channel	3.5			cross-strata_package	\N	20
\N	marine_siliciclastics	0.25			\N	fluvial_channel	0.5			cross-strata_package	\N	35
\N	marine_siliciclastics	0.15			\N	fluvial_channel	3.75			cross-strata_package	\N	8
\N	marine_siliciclastics	0.1			\N	fluvial_channel	1.5			cross-strata_package	\N	10
\N	marine_siliciclastics	0.05			\N	fluvial_channel	9			cross-strata_package	\N	4
\N	marine_siliciclastics	0.25			\N	fluvial_channel	0.5			cross-strata_package	\N	6
\N	marine_siliciclastics	0.5			\N	fluvial_channel	3			cross-strata_package	\N	10
\N	marine_siliciclastics	0.4			\N	fluvial_channel	3			cross-strata_package	\N	10
\N	marine_siliciclastics	0.3			\N	fluvial_channel	4			cross-strata_package	\N	10
\N	marine_siliciclastics	0.05			\N	fluvial_channel	5			cross-strata_package	\N	42
\N	marine_siliciclastics	0.05			\N	fluvial_channel	5			cross-strata_package	\N	25
\N	marine_siliciclastics	0.05			\N	fluvial_channel	5			cross-strata_package	\N	25
\N	marine_siliciclastics	0.15			\N	fluvial_channel	8			cross-strata_package	\N	35
\N	marine_siliciclastics	16			\N	fluvial_channel	0.25			cross-strata_package	\N	40
\N	marine_siliciclastics	20			\N	fluvial_channel	2.5			cross-strata_package	\N	10
\N	marine_siliciclastics	4			\N	fluvial_channel	7			cross-strata_package	\N	10
\N	marine_siliciclastics	12			\N	fluvial_channel	3			cross-strata_package	\N	20
\N	marine_siliciclastics	20			\N	fluvial_channel	0.5			cross-strata_package	\N	20
\N	marine_siliciclastics	28			\N	fluvial_channel	5			cross-strata_package	\N	7.5
\N	marine_siliciclastics	4			\N	fluvial_channel	5			cross-strata_package	\N	5
\N	marine_siliciclastics	20			\N	fluvial_channel	7			interdune_damp	\N	0.4
\N	marine_siliciclastics	12			\N	fluvial_channel	4			interdune_damp	\N	0.2
\N	marine_siliciclastics	4			\N	fluvial_channel	4			interdune_damp	\N	0.2
\N	marine_siliciclastics	4			\N	fluvial_channel	10			interdune_wet	\N	1
\N	marine_siliciclastics	4			\N	fluvial_channel	9.5			interdune_wet	\N	0.1
\N	marine_siliciclastics	4			\N	fluvial_channel	10			interdune_wet	\N	0.25
\N	marine_siliciclastics	4			\N	fluvial_channel	10			interdune_wet	\N	0.1
\N	marine_siliciclastics	4			\N	fluvial_channel	4			interdune_wet	\N	0.5
\N	marine_siliciclastics	4			\N	fluvial_channel	2.5			interdune_wet	\N	0.4
\N	marine_siliciclastics	4			\N	fluvial_channel	4			interdune_wet	\N	0.15
\N	marine_siliciclastics	4			\N	fluvial_channel	4			interdune_wet	\N	0.2
\N	marine_siliciclastics	22			\N	fluvial_channel	0.25			interdune_wet	\N	0.25
\N	marine_siliciclastics	5			\N	fluvial_channel	0.25			interdune_wet	\N	0.5
\N	marine_siliciclastics	5			\N	fluvial_channel	4			interdune_wet	\N	0.25
\N	marine_siliciclastics	5			\N	fluvial_channel	2.5			interdune_wet	\N	0.15
\N	marine_siliciclastics	5			\N	fluvial_channel	3			interdune_wet	\N	0.15
\N	marine_siliciclastics	4			\N	fluvial_channel	3			interdune_wet	\N	0.15
\N	marine_siliciclastics	4			\N	fluvial_channel	3			interdune_wet	\N	0.5
\N	marine_siliciclastics	4			\N	fluvial_channel	6			interdune_wet	\N	0.5
\N	marine_siliciclastics	4			\N	fluvial_channel	3			interdune_wet	\N	0.25
\N	marine_siliciclastics	4			\N	fluvial_channel	2			interdune_wet	\N	0.05
\N	marine_siliciclastics	4			\N	fluvial_channel	2			interdune_wet	\N	0.15
\N	marine_siliciclastics	3			\N	fluvial_channel	5			interdune_wet	\N	0.15
\N	marine_siliciclastics	3			\N	fluvial_channel	3			interdune_wet	\N	0.05
\N	marine_siliciclastics	4			\N	fluvial_channel	8			interdune_wet	\N	0.05
\N	marine_siliciclastics	0.5			\N	fluvial_channel	8			interdune_wet	\N	0.05
\N	marine_siliciclastics	2			\N	fluvial_channel	0.25			interdune_wet	\N	0.4
\N	marine_siliciclastics	1.5			\N	fluvial_channel	0.75			interdune_wet	\N	0.05
\N	marine_siliciclastics	2			\N	fluvial_channel	2.25			interdune_wet	\N	0.15
\N	marine_siliciclastics	2			\N	fluvial_channel	2.5			interdune_wet	\N	0.1
\N	marine_siliciclastics	5			\N	fluvial_channel	2.5			interdune_wet	\N	0.75
\N	marine_siliciclastics	2			\N	fluvial_channel	2.5			interdune_wet	\N	0.35
\N	marine_siliciclastics	6			\N	fluvial_channel	1.5			interdune_wet	\N	0.25
\N	marine_siliciclastics	2			\N	fluvial_channel	3			interdune_wet	\N	0.15
\N	marine_siliciclastics	2			\N	fluvial_channel	2			interdune_wet	\N	0.15
\N	marine_siliciclastics	1			\N	fluvial_channel	1.5			interdune_wet	\N	0.15
\N	marine_siliciclastics	1.5			\N	fluvial_channel	1.5			interdune_wet	\N	0.25
\N	marine_siliciclastics	1.5			\N	fluvial_channel	1			sandsheet_undifferentiated	\N	1
\N	non-channelized_fluvial_deposits	0.2			\N	fluvial_channel	0.25			sandsheet_undifferentiated	\N	0.25
\N	non-channelized_fluvial_deposits	0.4			\N	fluvial_channel	1.5			sandsheet_undifferentiated	\N	5
\N	non-channelized_fluvial_deposits	1.25			\N	fluvial_channel	2			sandsheet_undifferentiated	\N	0.5
\N	non-channelized_fluvial_deposits	0.25			\N	fluvial_channel	2			set	\N	0.75
\N	non-channelized_fluvial_deposits	1			\N	fluvial_channel	7			set	\N	0.75
\N	non-channelized_fluvial_deposits	1			\N	fluvial_channel	2.5			set	\N	0.5
\N	non-channelized_fluvial_deposits	1			\N	fluvial_channel	2			set	\N	0.5
\N	non-channelized_fluvial_deposits	0.5			\N	fluvial_channel	2			set	\N	0.25
\N	non-channelized_fluvial_deposits	9			\N	fluvial_channel	0.5			set	\N	0.25
\N	non-channelized_fluvial_deposits	1.4			\N	fluvial_channel	0.5			set	\N	0.25
\N	non-channelized_fluvial_deposits	3			\N	fluvial_channel	2			set	\N	1.2
\N	non-channelized_fluvial_deposits	4			\N	fluvial_channel	2.5			set	\N	2.2
\N	non-channelized_fluvial_deposits	4			\N	fluvial_channel	5			set	\N	0.75
\N	non-channelized_fluvial_deposits	20			\N	fluvial_channel	1.1			set	\N	0.75
\N	paleosol	1			\N	fluvial_channel	0.75			set	\N	0.75
\N	paleosol	0.15			\N	fluvial_channel	2.2			set	\N	1.5
\N	paleosol	0.25			\N	fluvial_channel	1.2			set	\N	1.2
\N	paleosol	0.4			\N	fluvial_channel	0.8			set	\N	0.2
\N	paleosol	0.25			\N	fluvial_channel	0.1			set	\N	0.2
\N	paleosol	0.8			\N	fluvial_channel	0.9			set	\N	0.2
\N	paleosol	0.4			\N	fluvial_channel	0.6			set	\N	1.5
\N	paleosol	2			\N	fluvial_channel	2			set	\N	0.3
\N	paleosol	0.4			\N	fluvial_channel	2.6			set	\N	0.3
\N	paleosol	2			\N	fluvial_channel	25			set	\N	1.5
\N	paleosol	1			\N	fluvial_channel	10.5			set	\N	0.25
\N	paleosol	0.3			\N	fluvial_channel	12			set	\N	1
\N	paleosol	0.5			\N	fluvial_channel	2.25			set	\N	1
\N	paleosol	0.3			\N	fluvial_channel	2.5			set	\N	0.3
\N	paleosol	0.5			\N	fluvial_channel	1.25			set	\N	1.25
\N	paleosol	0.4			\N	fluvial_channel	1.5			set	\N	4.5
\N	paleosol	0.6			\N	fluvial_channel	3			set	\N	0.3
\N	paleosol	0.6			\N	fluvial_channel	2.5			set	\N	0.8
\N	paleosol	2			\N	fluvial_channel	3.5			set	\N	0.2
\N	paleosol	0.6			\N	fluvial_channel	1.5			set	\N	1.5
\N	paleosol	0.75			\N	fluvial_channel	1.5			set	\N	0.5
\N	paleosol	1.75			\N	fluvial_channel	6			set	\N	0.4
\N	paleosol	2.25			\N	fluvial_channel	4			set	\N	0.2
\N	paleosol	1.9			\N	fluvial_channel	3.5			set	\N	0.4
\N	paleosol	2.3			\N	fluvial_channel	3			set	\N	0.5
\N	paleosol	2.5			\N	fluvial_channel	4			set	\N	0.8
\N	paleosol	1.2			\N	fluvial_channel	3			set	\N	1.5
\N	paleosol	2.75			\N	fluvial_channel	15			set	\N	0.8
\N	paleosol	0.5			\N	fluvial_channel	1.25			set	\N	1
\N	paleosol	3.5			\N	fluvial_channel	3.25			set	\N	2
\N	paleosol	3			\N	fluvial_channel	4			set	\N	0.8
\N	paleosol	1.2			\N	fluvial_channel	1.25			set	\N	0.3
\N	paleosol	1.2			\N	fluvial_channel	0.75			set	\N	0.5
\N	paleosol	0.3			\N	fluvial_channel,alluvial_sandstone_or_siltstone	10			set	\N	1.2
\N	paleosol	0.75			\N	fluvial_channel,alluvial_sandstone_or_siltstone	10			set	\N	1.75
\N	paleosol	0.75			\N	fluvial_channel,fluvial_sandstone	0.15			set	\N	1
\N	paleosol	0.5			\N	fluvial_channel,fluvial_sandstone	0.15			set	\N	0.25
\N	paleosol	1.6			\N	fluvial_channel,fluvial_sandstone	0.2			set	\N	0.25
\N	paleosol	0.5			\N	fluvial_channel,fluvial_sandstone	0.2			set	\N	0.25
compound_set	\N	5			\N	fluvial_channel,fluvial_sandstone	0.15			set	\N	0.25
compound_set	\N	3			\N	fluvial_channel,fluvial_sandstone	0.4			set	\N	0.5
compound_set	\N	3			\N	fluvial_channel,fluvial_sandstone	0.35			set	\N	0.5
compound_set	\N	3			\N	fluvial_channel,fluvial_sandstone	0.4			set	\N	0.2
compound_set	\N	2.2			\N	fluvial_channel,fluvial_sandstone	0.3			set	\N	0.5
compound_set	\N	3			\N	fluvial_channel,fluvial_sandstone	0.2			set	\N	0.3
coset	\N	0.6			\N	fluvial_channel,fluvial_sandstone	0.15			set	\N	0.3
coset	\N	1.5			\N	fluvial_channel,fluvial_sandstone	0.35			set	\N	0.5
coset	\N	1.5			\N	fluvial_channel,fluvial_sandstone	0.075			set	\N	0.5
coset	\N	1.5			\N	fluvial_channel,fluvial_sandstone	0.75			set	\N	1.2
coset	\N	0.3			\N	fluvial_channel,fluvial_sandstone	0.75			set	\N	0.25
coset	\N	0.3			\N	fluvial_channel,fluvial_sandstone	4			set	\N	0.25
coset	\N	0.9			\N	fluvial_channel,fluvial_sandstone	3			set	\N	1
coset	\N	0.6			\N	fluvial_channel,fluvial_sandstone	0.5			set	\N	0.75
coset	\N	0.9			\N	fluvial_channel,fluvial_sandstone	1			set	\N	0.75
coset	\N	0.6			\N	fluvial_channel,fluvial_sandstone	1.25			set	\N	0.25
coset	\N	0.9			\N	fluvial_channel,fluvial_sandstone	1.25			set	\N	0.75
coset	\N	0.6			\N	fluvial_channel,fluvial_sandstone	1.25			set	\N	0.25
coset	\N	0.4			\N	fluvial_channel,fluvial_sandstone	1.5			set	\N	0.25
coset	\N	0.8			\N	fluvial_channel,fluvial_sandstone	1.5			set	\N	2.5
coset	\N	2			\N	fluvial_channel,fluvial_sandstone	0.25			set	\N	3.5
coset	\N	2.75			\N	fluvial_channel,fluvial_sandstone	1.25			set	\N	2.5
coset	\N	4			\N	fluvial_channel,fluvial_sandstone	1			set	\N	1
coset	\N	1			\N	fluvial_channel,fluvial_sandstone	0.5			set	\N	1.5
coset	\N	8			\N	fluvial_channel,fluvial_sandstone	2			set	\N	1.1
coset	\N	10			\N	fluvial_channel,fluvial_sandstone	1			set	\N	0.9
coset	\N	4			\N	fluvial_channel,fluvial_sandstone	1			set	\N	1.5
coset	\N	7			\N	fluvial_channel,fluvial_sandstone	0.5			set	\N	1
coset	\N	3			\N	fluvial_channel,fluvial_sandstone	0.25			set	\N	3
coset	\N	9.5			\N	fluvial_channel,fluvial_sandstone	22			set	\N	0.75
coset	\N	2.5			\N	fluvial_channel,fluvial_sandstone	5			set	\N	0.75
coset	\N	1.5			\N	fluvial_channel,fluvial_sandstone	2.5			set	\N	0.15
coset	\N	1.5			\N	fluvial_channel,fluvial_sandstone	11			set	\N	0.25
coset	\N	1.1			\N	fluvial_channel,fluvial_sandstone	2			set	\N	0.15
coset	\N	1.1			\N	fluvial_channel,fluvial_sandstone	3.5			set	\N	0.4
coset	\N	1.5			\N	fluvial_channel,fluvial_sandstone	2.5			set	\N	0.5
coset	\N	2.25			\N	fluvial_channel,fluvial_sandstone	2			set	\N	0.5
coset	\N	1			\N	fluvial_channel,fluvial_sandstone	25			set	\N	0.75
coset	\N	2			\N	fluvial_channel,fluvial_sandstone	1.5			set	\N	0.15
coset	\N	1.8			\N	fluvial_channel,fluvial_sandstone	1			set	\N	2
coset	\N	1.8			\N	fluvial_channel,fluvial_sandstone	10			set	\N	1.2
coset	\N	5.5			\N	fluvial_channel,fluvial_sandstone	20			set	\N	0.8
coset	\N	5.5			\N	fluvial_channel,fluvial_sandstone	10			set	\N	1.2
coset	\N	5			\N	fluvial_channel,fluvial_sandstone	15			set	\N	2.7
coset	\N	3.5			\N	fluvial_channel,fluvial_sandstone	10			set	\N	2
coset	\N	4			\N	fluvial_mudstone	3			set	\N	2.5
coset	\N	7			\N	fluvial_mudstone,non-channelized_fluvial_deposits	7			set	\N	5
coset	\N	7			\N	fluvial_mudstone,non-channelized_fluvial_deposits	0.75			set	\N	0.25
coset	\N	4			\N	fluvial_mudstone,non-channelized_fluvial_deposits	0.25			set	\N	0.3
coset	\N	4			\N	fluvial_mudstone,non-channelized_fluvial_deposits	0.25			set	\N	45
coset	\N	6			\N	fluvial_mudstone,non-channelized_fluvial_deposits	0.25			set	\N	3
coset	\N	4.5			\N	fluvial_mudstone,non-channelized_fluvial_deposits	0.25			set	\N	2
coset	\N	4.5			\N	fluvial_mudstone,non-channelized_fluvial_deposits	0.25			set	\N	13
coset	\N	1			\N	fluvial_mudstone,non-channelized_fluvial_deposits	0.25			set	\N	13
coset	\N	2			\N	fluvial_mudstone,non-channelized_fluvial_deposits	2			set	\N	7
coset	\N	3			\N	fluvial_mudstone,non-channelized_fluvial_deposits	2			set	\N	7
coset	\N	1			\N	fluvial_mudstone,non-channelized_fluvial_deposits	2			set	\N	7
coset	\N	2			\N	fluvial_mudstone,non-channelized_fluvial_deposits	2			set	\N	15
coset	\N	5			\N	fluvial_mudstone,non-channelized_fluvial_deposits	5			set	\N	15
coset	\N	5			\N	fluvial_mudstone,non-channelized_fluvial_deposits	2			set	\N	15
cross-strata_package	\N	0.9			\N	fluvial_mudstone,non-channelized_fluvial_deposits	2			set	\N	10
cross-strata_package	\N	0.9			\N	fluvial_mudstone,non-channelized_fluvial_deposits	2			set	\N	20
cross-strata_package	\N	2			\N	fluvial_mudstone,non-channelized_fluvial_deposits	2			set	\N	8
cross-strata_package	\N	2			\N	fluvial_mudstone,non-channelized_fluvial_deposits	2			set	\N	16
cross-strata_package	\N	2			\N	fluvial_mudstone,non-channelized_fluvial_deposits	0.5			set	\N	5
cross-strata_package	\N	2			\N	fluvial_mudstone,non-channelized_fluvial_deposits	3			set	\N	8
cross-strata_package	\N	2			\N	fluvial_mudstone,non-channelized_fluvial_deposits	1.5			set	\N	55
cross-strata_package	\N	2			\N	fluvial_mudstone,non-channelized_fluvial_deposits	1			set	\N	50
cross-strata_package	\N	2			\N	fluvial_mudstone,non-channelized_fluvial_deposits	0.25			set	\N	35
cross-strata_package	\N	1.5			\N	fluvial_mudstone,non-channelized_fluvial_deposits	0.5			set	\N	55
cross-strata_package	\N	1.5			\N	fluvial_mudstone,non-channelized_fluvial_deposits	1.8			set	\N	20
cross-strata_package	\N	1.5			\N	fluvial_mudstone,non-channelized_fluvial_deposits	1			set	\N	40
cross-strata_package	\N	1			\N	fluvial_mudstone,non-channelized_fluvial_deposits	1			set	\N	40
cross-strata_package	\N	1			\N	fluvial_mudstone,non-channelized_fluvial_deposits	2			set	\N	50
cross-strata_package	\N	1.1			\N	fluvial_mudstone,non-channelized_fluvial_deposits	20			set	\N	10
cross-strata_package	\N	1.1			\N	fluvial_mudstone,non-channelized_fluvial_deposits	1			set	\N	22.5
cross-strata_package	\N	1			\N	fluvial_mudstone,non-channelized_fluvial_deposits	2.5			set	\N	60
cross-strata_package	\N	1			\N	fluvial_mudstone,non-channelized_fluvial_deposits	5			set	\N	60
cross-strata_package	\N	1.3			\N	fluvial_mudstone,non-channelized_fluvial_deposits	5			set	\N	8
cross-strata_package	\N	1.1			\N	fluvial_mudstone,non-channelized_fluvial_deposits	2.5			set	\N	2.5
cross-strata_package	\N	1.1			\N	fluvial_mudstone,non-channelized_fluvial_deposits	11			set	\N	35
cross-strata_package	\N	1.1			\N	fluvial_mudstone,non-channelized_fluvial_deposits	0.5			set	\N	15
cross-strata_package	\N	1.1			\N	fluvial_mudstone,non-channelized_fluvial_deposits	0.3			set	\N	30
cross-strata_package	\N	1			\N	fluvial_mudstone,non-channelized_fluvial_deposits	0.3			set	\N	30
cross-strata_package	\N	1.5			\N	fluvial_mudstone,non-channelized_fluvial_deposits	0.3			set	\N	8
cross-strata_package	\N	0.75			\N	fluvial_mudstone,non-channelized_fluvial_deposits	0.05			set	\N	5
cross-strata_package	\N	3			\N	fluvial_mudstone,non-channelized_fluvial_deposits	0.25			set	\N	8
cross-strata_package	\N	0.5			\N	fluvial_mudstone,non-channelized_fluvial_deposits	0.15			set	\N	14
cross-strata_package	\N	0.75			\N	fluvial_mudstone,non-channelized_fluvial_deposits	0.05			set	\N	36
cross-strata_package	\N	1			\N	fluvial_mudstone,non-channelized_fluvial_deposits	0.4			set	\N	15
cross-strata_package	\N	1			\N	fluvial_mudstone,non-channelized_fluvial_deposits	0.35			set	\N	12.5
cross-strata_package	\N	1			\N	fluvial_mudstone,non-channelized_fluvial_deposits	0.05			set	\N	2.5
cross-strata_package	\N	1			\N	fluvial_mudstone,non-channelized_fluvial_deposits	0.9			set	\N	13
cross-strata_package	\N	1			\N	fluvial_mudstone,non-channelized_fluvial_deposits	0.25			set	\N	17
cross-strata_package	\N	1			\N	fluvial_mudstone,non-channelized_fluvial_deposits	0.5			set	\N	7.5
cross-strata_package	\N	0.5			\N	fluvial_mudstone,non-channelized_fluvial_deposits	0.25			set	\N	7.5
cross-strata_package	\N	1			\N	fluvial_mudstone,non-channelized_fluvial_deposits	0.25			set	\N	10
cross-strata_package	\N	0.5			\N	fluvial_mudstone,non-channelized_fluvial_deposits	0.25			set	\N	10
cross-strata_package	\N	0.4			\N	fluvial_mudstone,non-channelized_fluvial_deposits	1.75			set	\N	10
cross-strata_package	\N	1.25			\N	fluvial_mudstone,non-channelized_fluvial_deposits	0.25			set	\N	20
cross-strata_package	\N	0.75			\N	fluvial_sandstone	11.5			set	\N	30
cross-strata_package	\N	0.75			\N	fluvial_sandstone	12			set	\N	35
cross-strata_package	\N	1.1			\N	fluvial_sandstone	11			set	\N	40
cross-strata_package	\N	0.9			\N	fluvial_sandstone	0.5			set	\N	35
cross-strata_package	\N	0.75			\N	fluvial_sandstone	1.5			set	\N	35
cross-strata_package	\N	1.1			\N	fluvial_sandstone	1.5			set	\N	20
cross-strata_package	\N	1.25			\N	fluvial_sandstone	0.5			set	\N	15
cross-strata_package	\N	1.25			\N	fluvial_sandstone	0.75			set	\N	10
cross-strata_package	\N	1			\N	fluvial_sandstone	0.75			set	\N	5
cross-strata_package	\N	1			\N	fluvial_sandstone	1.25			set	\N	8
cross-strata_package	\N	1			\N	fluvial_sandstone	0.75			set	\N	6
cross-strata_package	\N	1.25			\N	fluvial_sandstone	5			set	\N	6
cross-strata_package	\N	1.25			\N	fluvial_sandstone	12			set	\N	12
cross-strata_package	\N	1			\N	fluvial_sandstone	0.1			set	\N	5.5
cross-strata_package	\N	1			\N	fluvial_sandstone	0.1			set	\N	2
cross-strata_package	\N	1			\N	fluvial_sandstone	0.1			set	\N	2
cross-strata_package	\N	1			\N	fluvial_sandstone	0.1			set	\N	3
cross-strata_package	\N	0.75			\N	fluvial_sandstone	0.2			set	\N	5
cross-strata_package	\N	0.5			\N	fluvial_sandstone	0.1			set	\N	1.5
cross-strata_package	\N	0.5			\N	fluvial_sandstone	0.25			set	\N	2.5
cross-strata_package	\N	0.5			\N	fluvial_sandstone	0.2			set	\N	7.5
cross-strata_package	\N	0.5			\N	fluvial_sandstone	0.2			set	\N	2.5
cross-strata_package	\N	0.3			\N	fluvial_sandstone	0.2			set	\N	2.5
cross-strata_package	\N	0.3			\N	fluvial_sandstone	0.2			set	\N	12.5
cross-strata_package	\N	0.5			\N	fluvial_sandstone	0.3			set	\N	7.5
cross-strata_package	\N	0.5			\N	fluvial_sandstone	0.1			set	\N	5
cross-strata_package	\N	1.5			\N	fluvial_sandstone	0.1			set	\N	7.5
cross-strata_package	\N	0.5			\N	fluvial_sandstone	0.15			set	\N	2.5
cross-strata_package	\N	0.5			\N	fluvial_sandstone	0.5			set	\N	12.5
dune	\N	14			\N	fluvial_sandstone	0.15			set	\N	5			131
dune	\N	14			\N	fluvial_sandstone	0.15			set	\N	12.5
interdune_damp	\N	0.2			\N	fluvial_sandstone	0.15			set	\N	20
interdune_damp	\N	0.5			\N	fluvial_sandstone	0.15			set	\N	20
interdune_damp	\N	0.25			\N	fluvial_sandstone	0.15			set	\N	22.5
interdune_damp	\N	0.5			\N	fluvial_sandstone	0.15			set	\N	7.5
interdune_damp	\N	0.4			\N	fluvial_sandstone	0.5			set	\N	10
interdune_damp	\N	0.25			\N	fluvial_sandstone	0.2			set	\N	10
interdune_damp	\N	4			\N	fluvial_sandstone	0.3			set	\N	20
interdune_damp	\N	3			\N	fluvial_sandstone	1			set	\N	7.5
interdune_damp	\N	0.2			\N	fluvial_sandstone	1			set	\N	15
interdune_damp	\N	0.1			\N	fluvial_sandstone	1			set	\N	15
interdune_damp	\N	0.15			\N	fluvial_sandstone	0.5			set	\N	7.5
interdune_damp	\N	0.15			\N	fluvial_sandstone	0.2			set	\N	15
interdune_damp	\N	0.15			\N	fluvial_sandstone	1.5			set	\N	3
interdune_damp	\N	0.1			\N	fluvial_sandstone	1			set	\N	10
interdune_damp	\N	0.15			\N	fluvial_sandstone	0.4			set	\N	2.5
interdune_damp	\N	0.05			\N	fluvial_sandstone	0.4			set	\N	20
interdune_damp	\N	0.1			\N	fluvial_sandstone	0.4			set	\N	20
interdune_damp	\N	0.15			\N	fluvial_sandstone,non-channelized_fluvial_deposits	0.25			set	\N	20
interdune_damp	\N	0.075			\N	fluvial_sandstone,non-channelized_fluvial_deposits	0.25			set	\N	20
interdune_damp	\N	0.075			\N	fluvial_sandstone,non-channelized_fluvial_deposits	0.25			set	\N	15
interdune_damp	\N	0.05			\N	fluvial_sandstone,non-channelized_fluvial_deposits	0.25			set	\N	12.5
interdune_damp	\N	0.05			\N	fluvial_sandstone,non-channelized_fluvial_deposits	0.25			set	\N	8
interdune_damp	\N	0.05			\N	fluvial_sandstone,non-channelized_fluvial_deposits	0.75			set	\N	2
interdune_damp	\N	0.05			\N	fluvial_sandstone,non-channelized_fluvial_deposits	0.75			set	\N	2.5
interdune_damp	\N	0.05			\N	fluvial_sandstone,non-channelized_fluvial_deposits	0.75			set	\N	8
interdune_damp	\N	0.05			\N	fluvial_sandstone,non-channelized_fluvial_deposits	0.5			set	\N	7.5
interdune_damp	\N	0.25			\N	fluvial_sandstone,non-channelized_fluvial_deposits	0.5			set	\N	7.5
interdune_damp	\N	1			\N	fluvial_sandstone,non-channelized_fluvial_deposits	0.25			set	\N	5
interdune_damp	\N	2.2			\N	fluvial_sandstone,non-channelized_fluvial_deposits	0.25			set	\N	12.5
interdune_damp	\N	1			\N	fluvial_sandstone,non-channelized_fluvial_deposits	0.25			set	\N	5
interdune_damp	\N	3.5			\N	fluvial_sandstone,non-channelized_fluvial_deposits	0.5			set	\N	10
interdune_damp	\N	0.25			\N	fluvial_sandstone,non-channelized_fluvial_deposits	0.5			set	\N	12.5
interdune_damp	\N	0.15			\N	fluvial_sandstone,non-channelized_fluvial_deposits	0.5			set	\N	15
interdune_damp	\N	0.8			\N	fluvial_sandstone,non-channelized_fluvial_deposits	0.5			set	\N	5
interdune_damp	\N	0.25			\N	fluvial_sandstone,non-channelized_fluvial_deposits	0.5			set	\N	2.5
interdune_damp	\N	0.1			\N	fluvial_sandstone,non-channelized_fluvial_deposits	0.5			set	\N	17.5
interdune_damp	\N	0.2			\N	fluvial_sandstone,non-channelized_fluvial_deposits	0.5			set	\N	17.5
interdune_damp	\N	0.1			\N	fluvial_sandstone,non-channelized_fluvial_deposits	10			set	\N	15
interdune_damp	\N	1.1			\N	fluvial_sandstone,non-channelized_fluvial_deposits	25			set	\N	10
interdune_damp	\N	0.75			\N	fluvial_sandstone,non-channelized_fluvial_deposits	7			set	\N	10
interdune_damp	\N	0.75			\N	fluvial_sandstone,non-channelized_fluvial_deposits	16			set	\N	10
interdune_damp	\N	0.5			\N	fluvial_sandstone,non-channelized_fluvial_deposits	10			set	\N	10
interdune_damp	\N	0.6			\N	fluvial_sandstone,non-channelized_fluvial_deposits	10			set	\N	10
interdune_damp	\N	0.3			\N	fluvial_sandstone,non-channelized_fluvial_deposits	8			set	\N	10
interdune_damp	\N	0.15			\N	fluvial_sandstone,non-channelized_fluvial_deposits	8			set	\N	10
interdune_damp	\N	0.15			\N	fluvial_sandstone,non-channelized_fluvial_deposits	12			set	\N	8
interdune_damp	\N	0.15			\N	fluvial_sandstone,non-channelized_fluvial_deposits	12			set	\N	2
interdune_damp	\N	0.25			\N	fluvial_sandstone,non-channelized_fluvial_deposits	2			set	\N	5
interdune_damp	\N	0.75			\N	fluvial_sandstone,non-channelized_fluvial_deposits	5			set	\N	12.5
interdune_damp	\N	0.3			\N	fluvial_sandstone,non-channelized_fluvial_deposits	4			set	\N	7.5
interdune_damp	\N	0.15			\N	fluvial_sandstone,non-channelized_fluvial_deposits	4			set	\N	4
interdune_damp	\N	0.5			\N	fluvial_sandstone,non-channelized_fluvial_deposits	4			set	\N	12
interdune_damp	\N	0.5			\N	fluvial_sandstone,non-channelized_fluvial_deposits	8			set	\N	20
interdune_damp	\N	0.6			\N	fluvial_sandstone,non-channelized_fluvial_deposits	8			set	\N	10
interdune_damp	\N	0.6			\N	fluvial_sandstone,non-channelized_fluvial_deposits	9			set	\N	10
interdune_damp	\N	0.4			\N	fluvial_sandstone,non-channelized_fluvial_deposits	10			set	\N	2
interdune_damp	\N	0.2			\N	fluvial_sandstone,non-channelized_fluvial_deposits	9			set	\N	2
interdune_damp	\N	0.6			\N	fluvial_sandstone,non-channelized_fluvial_deposits	5			set	\N	6
interdune_damp	\N	2			\N	fluvial_sandstone,non-channelized_fluvial_deposits	2			set	\N	6
interdune_damp	\N	0.75			\N	fluvial_sandstone,non-channelized_fluvial_deposits	1			set	\N	8
interdune_damp	\N	0.3			\N	fluvial_sandstone,non-channelized_fluvial_deposits	2			set	\N	2.5
interdune_damp	\N	0.3			\N	fluvial_sandstone,non-channelized_fluvial_deposits	2			set	\N	15
interdune_damp	\N	1.2			\N	fluvial_sandstone,non-channelized_fluvial_deposits	0.5			set	\N	10
interdune_damp	\N	1			\N	fluvial_sandstone,non-channelized_fluvial_deposits	1			set	\N	8
interdune_damp	\N	1			\N	fluvial_sandstone,non-channelized_fluvial_deposits	8			set	\N	7
interdune_damp	\N	10			\N	fluvial_sandstone,non-channelized_fluvial_deposits	3			set	\N	5
interdune_damp	\N	0.5			\N	fluvial_sandstone,non-channelized_fluvial_deposits	1.5			set	\N	12.5
interdune_damp	\N	0.75			\N	fluvial_sandstone,non-channelized_fluvial_deposits	0.5			set	\N	11
interdune_damp	\N	0.25			\N	fluvial_sandstone,non-channelized_fluvial_deposits	1			set	\N	8
interdune_damp	\N	0.5			\N	fluvial_sandstone,non-channelized_fluvial_deposits	1			set	\N	10
interdune_damp,interdune_dry	\N	0.1			\N	fluvial_sandstone,non-channelized_fluvial_deposits	0.5			set	\N	12.5
interdune_damp,interdune_dry	\N	0.1			\N	fluvial_sandstone,non-channelized_fluvial_deposits	1			set	\N	0.5
interdune_damp,interdune_dry	\N	0.1			\N	fluvial_sandstone,non-channelized_fluvial_deposits	0.5			set	\N	3.1
interdune_dry	\N	0.5			\N	fluvial_sandstone,non-channelized_fluvial_deposits	1			set	\N	7
interdune_dry	\N	1.4			\N	fluvial_sandstone,non-channelized_fluvial_deposits	0.5			set	\N	1
interdune_dry	\N	1			\N	fluvial_sandstone,non-channelized_fluvial_deposits	0.5			set	\N	4.5
interdune_dry	\N	0.5			\N	fluvial_sandstone,non-channelized_fluvial_deposits	1.5			set	\N	4.4
interdune_dry	\N	0.2			\N	fluvial_sandstone,non-channelized_fluvial_deposits	1.5			set	\N	1.2
interdune_wet	\N	0.5			\N	fluvial_sandstone,non-channelized_fluvial_deposits	1			set	\N	4.1
interdune_wet	\N	0.4			\N	fluvial_sandstone,non-channelized_fluvial_deposits	1			set	\N	1.1
interdune_wet	\N	0.2			\N	fluvial_sandstone,non-channelized_fluvial_deposits	2			set	\N	0.9
interdune_wet	\N	0.1			\N	fluvial_sandstone,non-channelized_fluvial_deposits	3			set	\N	2.9
interdune_wet	\N	0.1			\N	fluvial_sandstone,non-channelized_fluvial_deposits	5			set	\N	7.4
interdune_wet	\N	0.1			\N	fluvial_sandstone,non-channelized_fluvial_deposits	1.5			set	\N	0.7
interdune_wet	\N	0.5			\N	fluvial_sandstone,non-channelized_fluvial_deposits	1.5			set	\N	5.5
interdune_wet	\N	0.2			\N	fluvial_sandstone,non-channelized_fluvial_deposits	0.5
interdune_wet	\N	0.1			\N	fluvial_sandstone,non-channelized_fluvial_deposits	1
interdune_wet	\N	1.2			\N	fluvial_sandstone,non-channelized_fluvial_deposits	4
interdune_wet	\N	0.25			\N	fluvial_sandstone,non-channelized_fluvial_deposits	1.5
interdune_wet	\N	0.2			\N	fluvial_sandstone,non-channelized_fluvial_deposits	6
interdune_wet	\N	0.5			\N	fluvial_sandstone,non-channelized_fluvial_deposits	5
interdune_wet	\N	0.15			\N	fluvial_sandstone,non-channelized_fluvial_deposits	5
interdune_wet	\N	0.1			\N	fluvial_sandstone,non-channelized_fluvial_deposits	2.5
interdune_wet	\N	0.1			\N	fluvial_sandstone,non-channelized_fluvial_deposits	10
interdune_wet	\N	0.15			\N	fluvial_sandstone,non-channelized_fluvial_deposits	5
interdune_wet	\N	0.05			\N	fluvial_sandstone,non-channelized_fluvial_deposits	5
interdune_wet	\N	0.05			\N	fluvial_sandstone,non-channelized_fluvial_deposits	2.5
interdune_wet	\N	0.5			\N	fluvial_sandstone,non-channelized_fluvial_deposits	2.5
interdune_wet	\N	1			\N	fluvial_sandstone,non-channelized_fluvial_deposits	2.5
interdune_wet	\N	0.8			\N	fluvial_sandstone,non-channelized_fluvial_deposits	3
interdune_wet	\N	0.25			\N	fluvial_sandstone,non-channelized_fluvial_deposits	3
interdune_wet	\N	0.6			\N	fluvial_sandstone,non-channelized_fluvial_deposits	4.5
interdune_wet	\N	1.2			\N	fluvial_sandstone,non-channelized_fluvial_deposits	4.5
interdune_wet	\N	1.3			\N	fluvial_sandstone,non-channelized_fluvial_deposits	2.5
interdune_wet	\N	0.25			\N	fluvial_sandstone,non-channelized_fluvial_deposits	1
interdune_wet	\N	0.25			\N	fluvial_sandstone,non-channelized_fluvial_deposits	0.5
interdune_wet	\N	0.1			\N	fluvial_sandstone,non-channelized_fluvial_deposits	0.5
interdune_wet	\N	0.1			\N	fluvial_sandstone,non-channelized_fluvial_deposits	0.5
interdune_wet	\N	0.8			\N	fluvial_sandstone,non-channelized_fluvial_deposits	0.5
interdune_wet	\N	0.8			\N	fluvial_sandstone,non-channelized_fluvial_deposits	0.5
interdune_wet	\N	0.5			\N	fluvial_sandstone,non-channelized_fluvial_deposits	0.5
interdune_wet	\N	1.2			\N	fluvial_sandstone,non-channelized_fluvial_deposits	0.5
interdune_wet	\N	1.25			\N	fluvial_sandstone,non-channelized_fluvial_deposits	0.5
interdune_wet	\N	0.15			\N	fluvial_sandstone,non-channelized_fluvial_deposits	0.25
interdune_wet	\N	0.15			\N	fluvial_sandstone,non-channelized_fluvial_deposits	1.75
sandsheet_undifferentiated	\N	0.2			\N	fluvial_sandstone,non-channelized_fluvial_deposits	0.45
sandsheet_undifferentiated	\N	0.4			\N	fluvial_sandstone,non-channelized_fluvial_deposits	0.5
sandsheet_undifferentiated	\N	0.1			\N	fluvial_sandstone,non-channelized_fluvial_deposits	0.1
sandsheet_undifferentiated	\N	0.15			\N	fluvial_sandstone,non-channelized_fluvial_deposits	0.3
sandsheet_undifferentiated	\N	0.1			\N	fluvial_sandstone,non-channelized_fluvial_deposits	0.25
sandsheet_undifferentiated	\N	0.1			\N	igneous	38
sandsheet_undifferentiated	\N	0.2			\N	igneous	6
sandsheet_undifferentiated	\N	0.15			\N	lacustine_carbonates	5
sandsheet_undifferentiated	\N	0.1			\N	lacustine_carbonates	3
sandsheet_undifferentiated	\N	0.05			\N	lacustrine_siliciclastics	4
sandsheet_undifferentiated	\N	0.15			\N	lacustrine_siliciclastics	4
sandsheet_undifferentiated	\N	0.15			\N	lacustrine_siliciclastics	2.5
sandsheet_undifferentiated	\N	0.1			\N	lacustrine_siliciclastics	5
sandsheet_undifferentiated	\N	0.1			\N	lacustrine_siliciclastics	5
sandsheet_undifferentiated	\N	0.15			\N	lacustrine_siliciclastics	5
sandsheet_undifferentiated	\N	0.15			\N	lacustrine_siliciclastics	6
sandsheet_undifferentiated	\N	0.15			\N	lacustrine_siliciclastics	7
sandsheet_undifferentiated	\N	0.1			\N	lacustrine_siliciclastics	4
sandsheet_undifferentiated	\N	0.025			\N	lacustrine_siliciclastics	1.8
sandsheet_undifferentiated	\N	0.025			\N	lacustrine_siliciclastics	1.8
sandsheet_undifferentiated	\N	0.1			\N	lacustrine_siliciclastics	17
sandsheet_undifferentiated	\N	0.1			\N	lacustrine_siliciclastics	40
sandsheet_undifferentiated	\N	0.05			\N	lacustrine_siliciclastics	2.5
sandsheet_undifferentiated	\N	0.05			\N	lacustrine_siliciclastics	9
sandsheet_undifferentiated	\N	0.05			\N	lacustrine_siliciclastics	1.5
sandsheet_undifferentiated	\N	0.05			\N	lacustrine_siliciclastics	1
sandsheet_undifferentiated	\N	0.05			\N	lacustrine_siliciclastics	1.5
sandsheet_undifferentiated	\N	0.05			\N	lacustrine_siliciclastics	1
sandsheet_undifferentiated	\N	0.1			\N	lacustrine_siliciclastics	6
sandsheet_undifferentiated	\N	0.1			\N	lacustrine_siliciclastics	1
sandsheet_undifferentiated	\N	0.05			\N	lacustrine_siliciclastics	4
sandsheet_undifferentiated	\N	0.1			\N	lacustrine_siliciclastics	2
sandsheet_undifferentiated	\N	0.1			\N	lacustrine_siliciclastics	3
sandsheet_undifferentiated	\N	0.4			\N	lacustrine_siliciclastics	3
sandsheet_undifferentiated	\N	0.4			\N	lacustrine_siliciclastics	1
sandsheet_undifferentiated	\N	0.5			\N	lacustrine_siliciclastics	2
sandsheet_undifferentiated	\N	0.25			\N	lacustrine_siliciclastics	1.5
sandsheet_undifferentiated	\N	0.4			\N	lacustrine_siliciclastics	1
sandsheet_undifferentiated	\N	0.1			\N	lacustrine_siliciclastics	2
sandsheet_undifferentiated	\N	0.3			\N	lacustrine_siliciclastics	2
sandsheet_undifferentiated	\N	0.25			\N	lacustrine_siliciclastics	0.5
sandsheet_undifferentiated	\N	0.25			\N	lacustrine_siliciclastics	1
sandsheet_undifferentiated	\N	0.25			\N	lacustrine_siliciclastics	1
sandsheet_undifferentiated	\N	0.25			\N	lacustrine_siliciclastics	1
sandsheet_undifferentiated	\N	0.25			\N	lacustrine_siliciclastics	1
sandsheet_undifferentiated	\N	0.15			\N	lacustrine_siliciclastics	1
sandsheet_undifferentiated	\N	1.1			\N	lacustrine_siliciclastics	1.5
sandsheet_undifferentiated	\N	0.2			\N	lacustrine_siliciclastics	4.5
sandsheet_undifferentiated	\N	0.5			\N	lacustrine_siliciclastics	2
sandsheet_undifferentiated	\N	1			\N	lacustrine_siliciclastics	4
sandsheet_undifferentiated	\N	1.25			\N	lacustrine_siliciclastics	2
sandsheet_undifferentiated	\N	0.25			\N	lacustrine_siliciclastics	2.5
sandsheet_undifferentiated	\N	1.5			\N	lacustrine_siliciclastics	0.25
sandsheet_undifferentiated	\N	1.25			\N	lacustrine_siliciclastics	0.25
sandsheet_undifferentiated	\N	0.8			\N	lacustrine_siliciclastics	0.25
sandsheet_undifferentiated	\N	0.2			\N	marine_carbonates	0.5
sandsheet_undifferentiated	\N	0.2			\N	marine_carbonates	1.5
sandsheet_undifferentiated	\N	0.2			\N	marine_carbonates	1.5
sandsheet_undifferentiated	\N	1			\N	marine_carbonates	1
sandsheet_undifferentiated	\N	0.6			\N	marine_carbonates	1
sandsheet_undifferentiated	\N	1			\N	marine_carbonates	1
sandsheet_undifferentiated	\N	0.2			\N	marine_carbonates	2
sandsheet_undifferentiated	\N	0.2			\N	marine_carbonates	4
sandsheet_undifferentiated	\N	1.5			\N	marine_carbonates	0.25
sandsheet_undifferentiated	\N	0.2			\N	marine_carbonates	0.75
sandsheet_undifferentiated	\N	1			\N	marine_carbonates	28
sandsheet_undifferentiated	\N	1.6			\N	marine_carbonates,sabkha_and_playa_lake	0.75
sandsheet_undifferentiated	\N	0.3			\N	marine_carbonates,sabkha_and_playa_lake	1.5
sandsheet_undifferentiated	\N	0.75			\N	marine_siliciclastics	0.25
sandsheet_undifferentiated	\N	1.2			\N	marine_siliciclastics	0.8
sandsheet_undifferentiated	\N	0.6			\N	marine_siliciclastics	0.8
sandsheet_undifferentiated	\N	0.3			\N	marine_siliciclastics	0.5
sandsheet_undifferentiated	\N	2.75			\N	marine_siliciclastics	2
sandsheet_undifferentiated	\N	3			\N	marine_siliciclastics	1.5
sandsheet_undifferentiated	\N	0.5			\N	marine_siliciclastics	0.2
sandsheet_undifferentiated	\N	0.2			\N	marine_siliciclastics	0.8
sandsheet_undifferentiated	\N	0.3			\N	marine_siliciclastics	0.1
sandsheet_undifferentiated	\N	0.2			\N	marine_siliciclastics	0.5
sandsheet_undifferentiated	\N	0.4			\N	marine_siliciclastics	0.8
sandsheet_undifferentiated	\N	0.05			\N	marine_siliciclastics	1.2
sandsheet_undifferentiated	\N	0.05			\N	marine_siliciclastics	0.9
sandsheet_undifferentiated	\N	0.05			\N	marine_siliciclastics	3
sandsheet_undifferentiated	\N	0.15			\N	marine_siliciclastics	1.2
sandsheet_undifferentiated	\N	0.25			\N	marine_siliciclastics	0.8
sandsheet_undifferentiated	\N	0.05			\N	marine_siliciclastics	1.2
sandsheet_undifferentiated	\N	0.2			\N	marine_siliciclastics	0.8
sandsheet_undifferentiated	\N	0.05			\N	marine_siliciclastics	0.5
sandsheet_undifferentiated	\N	0.05			\N	marine_siliciclastics	1.7
sandsheet_undifferentiated	\N	0.2			\N	marine_siliciclastics	1
sandsheet_undifferentiated	\N	0.05			\N	marine_siliciclastics	2.5
sandsheet_undifferentiated	\N	0.1			\N	marine_siliciclastics	1.25
sandsheet_undifferentiated	\N	0.05			\N	marine_siliciclastics	0.1
sandsheet_undifferentiated	\N	0.05			\N	marine_siliciclastics	1.5
sandsheet_undifferentiated	\N	0.05			\N	marine_siliciclastics	4.5
sandsheet_undifferentiated	\N	0.05			\N	marine_siliciclastics	4.5
sandsheet_undifferentiated	\N	0.05			\N	marine_siliciclastics	3
sandsheet_undifferentiated	\N	0.2			\N	marine_siliciclastics	3
sandsheet_undifferentiated	\N	8			\N	marine_siliciclastics	2
sandsheet_undifferentiated	\N	4			\N	marine_siliciclastics	2
sandsheet_undifferentiated	\N	4			\N	marine_siliciclastics	1.5
sandsheet_undifferentiated	\N	4			\N	marine_siliciclastics	1
sandsheet_undifferentiated	\N	4			\N	marine_siliciclastics	3
sandsheet_undifferentiated	\N	4			\N	marine_siliciclastics	1.1
sandsheet_undifferentiated	\N	12			\N	marine_siliciclastics	0.4
sandsheet_undifferentiated	\N	16			\N	marine_siliciclastics	0.4
sandsheet_undifferentiated	\N	4			\N	marine_siliciclastics	1
sandsheet_undifferentiated	\N	16			\N	marine_siliciclastics	2.5
sandsheet_undifferentiated	\N	20			\N	marine_siliciclastics	10
sandsheet_undifferentiated	\N	40			\N	marine_siliciclastics	3
sandsheet_undifferentiated	\N	0.4			\N	marine_siliciclastics	0.4
sandsheet_undifferentiated	\N	0.4			\N	marine_siliciclastics	0.75
sandsheet_undifferentiated	\N	0.4			\N	marine_siliciclastics	1
sandsheet_undifferentiated	\N	0.5			\N	marine_siliciclastics	1.75
sandsheet_undifferentiated	\N	0.75			\N	marine_siliciclastics	0.6
sandsheet_undifferentiated	\N	1.25			\N	marine_siliciclastics	2
sandsheet_undifferentiated	\N	1			\N	marine_siliciclastics	13
sandsheet_undifferentiated	\N	0.75			\N	marine_siliciclastics	1
sandsheet_undifferentiated	\N	1			\N	marine_siliciclastics	2
sandsheet_undifferentiated	\N	2			\N	marine_siliciclastics	5.5
sandsheet_undifferentiated	\N	0.5			\N	marine_siliciclastics	1
sandsheet_undifferentiated	\N	0.4			\N	marine_siliciclastics	4
sandsheet_undifferentiated	\N	4			\N	marine_siliciclastics	4
sandsheet_undifferentiated	\N	3.5			\N	marine_siliciclastics	0.75
sandsheet_undifferentiated	\N	0.5			\N	marine_siliciclastics	1
sandsheet_undifferentiated	\N	1			\N	marine_siliciclastics	0.25
sandsheet_undifferentiated	\N	0.75			\N	marine_siliciclastics	0.25
sandsheet_undifferentiated	\N	0.2			\N	marine_siliciclastics	0.25
sandsheet_undifferentiated	\N	0.1			\N	marine_siliciclastics	0.25
sandsheet_undifferentiated	\N	0.4			\N	marine_siliciclastics	0.5
sandsheet_undifferentiated	\N	0.5			\N	marine_siliciclastics	0.25
sandsheet_undifferentiated	\N	1			\N	marine_siliciclastics	0.25
sandsheet_undifferentiated	\N	1			\N	marine_siliciclastics	0.2
sandsheet_undifferentiated	\N	1.5			\N	marine_siliciclastics	1
sandsheet_undifferentiated	\N	1.5			\N	marine_siliciclastics	0.3
sandsheet_undifferentiated	\N	1.5			\N	marine_siliciclastics	0.2
sandsheet_undifferentiated	\N	0.25			\N	marine_siliciclastics	1.5
sandsheet_undifferentiated	\N	1			\N	marine_siliciclastics	2.5
sandsheet_undifferentiated	\N	0.75			\N	marine_siliciclastics	1
sandsheet_undifferentiated	\N	1			\N	marine_siliciclastics	0.25
sandsheet_undifferentiated	\N	0.25			\N	non-channelized_fluvial_deposits	0.5
sandsheet_undifferentiated	\N	1.5			\N	non-channelized_fluvial_deposits	0.75
sandsheet_undifferentiated	\N	0.5			\N	non-channelized_fluvial_deposits	0.5
sandsheet_undifferentiated	\N	0.2			\N	non-channelized_fluvial_deposits	0.5
sandsheet_undifferentiated	\N	0.2			\N	non-channelized_fluvial_deposits	2
sandsheet_undifferentiated	\N	0.4			\N	non-channelized_fluvial_deposits	0.25
sandsheet_undifferentiated	\N	0.2			\N	non-channelized_fluvial_deposits	0.75
sandsheet_undifferentiated	\N	0.1			\N	non-channelized_fluvial_deposits	0.75
sandsheet_undifferentiated	\N	0.15			\N	non-channelized_fluvial_deposits	0.75
sandsheet_undifferentiated	\N	0.25			\N	non-channelized_fluvial_deposits	0.75
sandsheet_undifferentiated	\N	0.25			\N	non-channelized_fluvial_deposits	1.5
sandsheet_undifferentiated	\N	0.25			\N	non-channelized_fluvial_deposits	1.5
sandsheet_undifferentiated	\N	0.5			\N	non-channelized_fluvial_deposits	0.25
sandsheet_undifferentiated	\N	0.25			\N	non-channelized_fluvial_deposits	1.5
sandsheet_undifferentiated	\N	0.25			\N	non-channelized_fluvial_deposits	1.5
sandsheet_undifferentiated	\N	0.25			\N	non-channelized_fluvial_deposits	0.1
sandsheet_undifferentiated	\N	0.5			\N	non-channelized_fluvial_deposits	0.1
sandsheet_undifferentiated	\N	0.15			\N	non-channelized_fluvial_deposits	0.1
sandsheet_undifferentiated	\N	0.5			\N	non-channelized_fluvial_deposits	0.1
sandsheet_undifferentiated	\N	0.2			\N	non-channelized_fluvial_deposits	0.1
sandsheet_undifferentiated	\N	0.25			\N	non-channelized_fluvial_deposits	0.25
sandsheet_undifferentiated	\N	0.4			\N	non-channelized_fluvial_deposits	0.25
sandsheet_undifferentiated	\N	0.3			\N	non-channelized_fluvial_deposits	0.1
sandsheet_undifferentiated	\N	1			\N	non-channelized_fluvial_deposits	0.1
sandsheet_undifferentiated,interdune_damp	\N	0.75			\N	non-channelized_fluvial_deposits	27
sandsheet_undifferentiated,sandsheet_zibar	\N	1			\N	non-channelized_fluvial_deposits	5
sandsheet_zibar	\N	20			\N	non-channelized_fluvial_deposits	1
sandsheet_zibar	\N	15			\N	non-channelized_fluvial_deposits	3
sandsheet_zibar	\N	85			\N	non-channelized_fluvial_deposits	1.25
sandsheet_zibar	\N	80			\N	non-channelized_fluvial_deposits	0.5
sandsheet_zibar	\N	70			\N	non-channelized_fluvial_deposits	1.25
sandsheet_zibar	\N	0.7			\N	non-channelized_fluvial_deposits	1
sandsheet_zibar	\N	2.5			\N	non-channelized_fluvial_deposits	1.5
sandsheet_zibar	\N	0.5			\N	non-channelized_fluvial_deposits	5
set	\N	0.8			\N	non-channelized_fluvial_deposits	1
set	\N	1.2			\N	non-channelized_fluvial_deposits	1
set	\N	0.9			\N	non-channelized_fluvial_deposits	1
set	\N	1.2			\N	non-channelized_fluvial_deposits	0.75
set	\N	1.2			\N	non-channelized_fluvial_deposits	0.75
set	\N	0.5			\N	non-channelized_fluvial_deposits	0.75
set	\N	2			\N	non-channelized_fluvial_deposits	0.1
set	\N	0.5			\N	non-channelized_fluvial_deposits	0.1
set	\N	0.4			\N	non-channelized_fluvial_deposits	0.25
set	\N	1			\N	non-channelized_fluvial_deposits	0.25
set	\N	0.6			\N	non-channelized_fluvial_deposits	0.2
set	\N	1.25			\N	non-channelized_fluvial_deposits	0.25
set	\N	1.75			\N	non-channelized_fluvial_deposits	0.25
set	\N	0.75			\N	non-channelized_fluvial_deposits	0.25
set	\N	3			\N	non-channelized_fluvial_deposits	0.25
set	\N	1.4			\N	non-channelized_fluvial_deposits	0.25
set	\N	0.4			\N	non-channelized_fluvial_deposits	0.3
set	\N	3			\N	non-channelized_fluvial_deposits	0.3
set	\N	1			\N	non-channelized_fluvial_deposits	0.5
set	\N	0.5			\N	non-channelized_fluvial_deposits	0.5
set	\N	1			\N	non-channelized_fluvial_deposits	0.25
set	\N	1			\N	non-channelized_fluvial_deposits	0.6
set	\N	1.5			\N	non-channelized_fluvial_deposits	0.6
set	\N	0.75			\N	non-channelized_fluvial_deposits	0.25
set	\N	1			\N	non-channelized_fluvial_deposits	0.25
set	\N	3			\N	non-channelized_fluvial_deposits	1
set	\N	2			\N	non-channelized_fluvial_deposits	0.3
set	\N	3			\N	non-channelized_fluvial_deposits	0.25
set	\N	2.4			\N	non-channelized_fluvial_deposits	2.5
set	\N	2.4			\N	non-channelized_fluvial_deposits	10
set	\N	1.6			\N	non-channelized_fluvial_deposits	1
set	\N	2			\N	non-channelized_fluvial_deposits	10
set	\N	2			\N	non-channelized_fluvial_deposits	1
set	\N	0.7			\N	non-channelized_fluvial_deposits	1
set	\N	0.35			\N	non-channelized_fluvial_deposits	0.5
set	\N	1			\N	non-channelized_fluvial_deposits	5
set	\N	0.8			\N	non-channelized_fluvial_deposits	0.5
set	\N	0.3			\N	non-channelized_fluvial_deposits	0.5
set	\N	0.3			\N	non-channelized_fluvial_deposits	1
set	\N	0.5			\N	non-channelized_fluvial_deposits	2.5
set	\N	0.4			\N	non-channelized_fluvial_deposits	2.5
set	\N	0.6			\N	non-channelized_fluvial_deposits	1
set	\N	3.5			\N	non-channelized_fluvial_deposits	0.25
set	\N	0.5			\N	non-channelized_fluvial_deposits	0.25
set	\N	3			\N	non-channelized_fluvial_deposits	0.25
set	\N	0.75			\N	non-channelized_fluvial_deposits	0.25
set	\N	1.25			\N	non-channelized_fluvial_deposits	0.25
set	\N	0.5			\N	non-channelized_fluvial_deposits	0.25
set	\N	1.6			\N	non-channelized_fluvial_deposits	0.5
set	\N	1.2			\N	non-channelized_fluvial_deposits	1
set	\N	0.75			\N	non-channelized_fluvial_deposits	0.75
set	\N	0.75			\N	non-channelized_fluvial_deposits	0.8
set	\N	1.75			\N	non-channelized_fluvial_deposits	1
set	\N	0.25			\N	paleosol	1
set	\N	1			\N	paleosol	2
set	\N	0.25			\N	paleosol	9
set	\N	3			\N	paleosol	1
set	\N	2.75			\N	paleosol	2
set	\N	0.75			\N	paleosol	1
set	\N	1.5			\N	paleosol	0.5
set	\N	4.25			\N	paleosol	0.5
set	\N	7			\N	paleosol	0.5
set	\N	6			\N	peat	1
set	\N	3.5			\N	peat	0.1
set	\N	4			\N	peat	0.1
set	\N	2.5			\N	peat	0.1
set	\N	3			\N	peat	0.9
set	\N	3			\N	precipitates	17.5
set	\N	3			\N	sabkha_and_playa_lake	3
set	\N	3			\N	sabkha_and_playa_lake	5
set	\N	1.25			\N	sabkha_and_playa_lake	5
set	\N	1			\N	sabkha_and_playa_lake	6
set	\N	0.15			\N	sabkha_and_playa_lake	2
set	\N	0.05			\N	sabkha_and_playa_lake	6
set	\N	0.05			\N	sabkha_and_playa_lake	2.5
set	\N	4			\N	sabkha_and_playa_lake	0.25
set	\N	3			\N	sabkha_and_playa_lake	0.25
set	\N	3			\N	sabkha_and_playa_lake	0.75
set	\N	1			\N	sabkha_and_playa_lake	0.25
set	\N	1			\N	sabkha_and_playa_lake	2
set	\N	1			\N	sabkha_and_playa_lake	5.5
set	\N	2			\N	sabkha_and_playa_lake	0.5
set	\N	2			\N	sabkha_and_playa_lake	1
set	\N	0.5			\N	sabkha_and_playa_lake	1
set	\N	5			\N	sabkha_and_playa_lake	5
set	\N	5			\N	sabkha_and_playa_lake	1
set	\N	10			\N	sabkha_and_playa_lake	0.5
set	\N	1			\N	sabkha_and_playa_lake	0.5
set	\N	5			\N	sabkha_and_playa_lake	2
set	\N	15			\N	sabkha_and_playa_lake	2
set	\N	15			\N	sabkha_and_playa_lake	5
set	\N	2			\N	sabkha_and_playa_lake	5
set	\N	10			\N	sabkha_and_playa_lake	3
set	\N	2			\N	sabkha_and_playa_lake	2
set	\N	0.5			\N	sabkha_and_playa_lake	2
set	\N	0.6			\N	sabkha_and_playa_lake	3
set	\N	0.6			\N	sabkha_and_playa_lake	5
set	\N	0.5			\N	sabkha_and_playa_lake	2
set	\N	0.3			\N	sabkha_and_playa_lake	2
set	\N	0.3			\N	sabkha_and_playa_lake	4
set	\N	0.4			\N	sabkha_and_playa_lake	6
set	\N	0.5			\N	sabkha_and_playa_lake	7.5
set	\N	1.5			\N	sabkha_and_playa_lake	3
set	\N	2			\N	sabkha_and_playa_lake	4
set	\N	1.5			\N	sabkha_and_playa_lake	7
set	\N	0.5			\N	sabkha_and_playa_lake	3.75
set	\N	0.5			\N	sabkha_and_playa_lake	36.5
set	\N	0.6			\N	sabkha_and_playa_lake	5
set	\N	0.6			\N	sabkha_and_playa_lake	11.25
set	\N	0.5			\N	sabkha_and_playa_lake	5
set	\N	0.3			\N	sabkha_and_playa_lake	0.4
set	\N	0.3			\N	sabkha_and_playa_lake	1.5
set	\N	12			\N	sabkha_and_playa_lake	1.5
set	\N	2			\N	sabkha_and_playa_lake	5
set	\N	3			\N	sabkha_and_playa_lake	2.5
set	\N	0.75			\N	sabkha_and_playa_lake	2.25
set	\N	9			\N	sabkha_and_playa_lake	2.25
set	\N	0.5			\N	sabkha_and_playa_lake	1.5
set	\N	2			\N	sabkha_and_playa_lake	0.375
set	\N	2			\N	sabkha_and_playa_lake	0.375
set	\N	11			\N	sabkha_and_playa_lake	0.375
set	\N	5			\N	sabkha_and_playa_lake	0.375
set	\N	2			\N	sabkha_and_playa_lake	0.15
set	\N	2			\N	sabkha_and_playa_lake	0.375
set	\N	1			\N	sabkha_and_playa_lake	1.5
set	\N	5			\N	sabkha_and_playa_lake	0.5
set	\N	3			\N	sabkha_and_playa_lake	2.5
set	\N	2			\N	sabkha_and_playa_lake	2
set	\N	2			\N	sabkha_and_playa_lake	2
set	\N	2			\N	sabkha_and_playa_lake	1
set	\N	3.5			\N	sabkha_and_playa_lake	2
set	\N	6			\N	sabkha_and_playa_lake	7
set	\N	1.2			\N	sabkha_and_playa_lake	1
set	\N	4.5			\N	sabkha_and_playa_lake	1
set	\N	2			\N	sabkha_and_playa_lake	4
set	\N	1.2			\N	sabkha_and_playa_lake	1
set	\N	2			\N	sabkha_and_playa_lake	7
set	\N	2			\N	sabkha_and_playa_lake	3
set	\N	0.5			\N	sabkha_and_playa_lake	5
set	\N	2			\N	sabkha_and_playa_lake	7
set	\N	4			\N	sabkha_and_playa_lake	2.5
set	\N	4			\N	sabkha_and_playa_lake	3
set	\N	3			\N	sabkha_and_playa_lake	2.5
set	\N	3			\N	sabkha_and_playa_lake	0.5
set	\N	2			\N	sabkha_and_playa_lake	2.5
set	\N	2			\N	sabkha_and_playa_lake	2.5
set	\N	1			\N	sabkha_and_playa_lake	7.5
set	\N	1.5			\N	sabkha_and_playa_lake	1
set	\N	1.25			\N	sabkha_and_playa_lake	2.5
set	\N	0.25			\N	sabkha_and_playa_lake	2.5
set	\N	0.75			\N	sabkha_and_playa_lake	2.5
set	\N	0.75			compound_set	\N	10
set	\N	0.4			compound_set	\N	8
set	\N	0.7			compound_set	\N	10
set	\N	0.5			compound_set	\N	15
set	\N	0.6			compound_set	\N	15
set	\N	0.5			compound_set	\N	17
set	\N	1			compound_set	\N	7.5
set	\N	1			compound_set	\N	7.5
set	\N	1.25			compound_set	\N	15
set	\N	0.5			compound_set	\N	4.5
set	\N	0.5			compound_set	\N	3.5
set	\N	1			compound_set	\N	1.75
set	\N	1			compound_set	\N	1.7
set	\N	1			compound_set	\N	1.7
set	\N	1			compound_set	\N	5
set	\N	1			compound_set	\N	1
set	\N	0.8			compound_set	\N	1
set	\N	1			compound_set	\N	3
set	\N	0.7			compound_set	\N	3
set	\N	1.1			compound_set	\N	4
set	\N	0.2			compound_set	\N	4
set	\N	1			compound_set	\N	10.5
set	\N	2			compound_set	\N	10
set	\N	1.5			compound_set	\N	5
set	\N	2			compound_set	\N	10
set	\N	2			compound_set	\N	3
set	\N	2			compound_set	\N	8
set	\N	3			compound_set	\N	15
set	\N	3			compound_set	\N	3
set	\N	2.5			compound_set	\N	7
set	\N	4			compound_set	\N	3
set	\N	4			compound_set	\N	8
set	\N	3			compound_set	\N	30
set	\N	2.5			compound_set	\N	7.5
set	\N	2.5			compound_set	\N	34.5
set	\N	3			compound_set	\N	33
set	\N	2			compound_set	\N	21
set	\N	2			compound_set	\N	8
set	\N	3			compound_set	\N	12
set	\N	3			compound_set	\N	10
set	\N	2			compound_set	\N	26
set	\N	2.5			coset	\N	15
set	\N	2.5			coset	\N	15
set	\N	2.5			coset	\N	6
set	\N	2.5			coset	\N	7
set	\N	2.5			coset	\N	4
set	\N	2			coset	\N	1.5
set	\N	2			coset	\N	1
set	\N	2			coset	\N	3
set	\N	2			coset	\N	3
set	\N	2			coset	\N	4
set	\N	2			coset	\N	0.45
set	\N	1.5			coset	\N	3.25
set	\N	1.5			coset	\N	4
set	\N	2			coset	\N	20
set	\N	3.5			coset	\N	10
set	\N	1			coset	\N	28.75
set	\N	3			coset	\N	30
set	\N	1.5			coset	\N	4
set	\N	3			coset	\N	9
set	\N	1			coset	\N	2.8
set	\N	2.5			coset	\N	3
set	\N	1.5			coset	\N	3
set	\N	1.5			coset	\N	3
set	\N	2			coset	\N	1
set	\N	2			coset	\N	1
set	\N	2			coset	\N	2
set	\N	4			coset	\N	0.75
set	\N	3			coset	\N	2
set	\N	4			coset	\N	20
set	\N	3			coset	\N	1
set	\N	4			coset	\N	3
set	\N	2			coset	\N	6
set	\N	2			coset	\N	4.5
set	\N	2			coset	\N	3
set	\N	2			coset	\N	5.5
set	\N	3			cross-strata_package	\N	2
set	\N	4			cross-strata_package	\N	1
set	\N	3			cross-strata_package	\N	2
set	\N	2			cross-strata_package	\N	2
set	\N	2			cross-strata_package	\N	2
set	\N	2			cross-strata_package	\N	1
set	\N	2			cross-strata_package	\N	1
set	\N	1			cross-strata_package	\N	4
set	\N	2			cross-strata_package	\N	3
set	\N	2			cross-strata_package	\N	4
set	\N	1			cross-strata_package	\N	4
set	\N	1.5			cross-strata_package	\N	1
set	\N	1.5			cross-strata_package	\N	0.75
set	\N	1.5			cross-strata_package	\N	4
set	\N	1.5			cross-strata_package	\N	4
set	\N	1			cross-strata_package	\N	1
set	\N	1.5			cross-strata_package	\N	1
set	\N	1.5			cross-strata_package	\N	1
set	\N	2			cross-strata_package	\N	1.25
set	\N	1.5			cross-strata_package	\N	0.25
set	\N	1.5			cross-strata_package	\N	0.25
set	\N	1.5			cross-strata_package	\N	0.25
set	\N	1.5			cross-strata_package	\N	0.75
set	\N	0.6			cross-strata_package	\N	2
set	\N	0.4			cross-strata_package	\N	4
set	\N	1			cross-strata_package	\N	5
set	\N	1			cross-strata_package	\N	5
set	\N	1.5			cross-strata_package	\N	5
set	\N	1.5			cross-strata_package	\N	1.2
set	\N	0.5			cross-strata_package	\N	2.6
set	\N	0.5			cross-strata_package	\N	2
set	\N	1			cross-strata_package	\N	0.8
set	\N	1			cross-strata_package	\N	0.8
set	\N	1			cross-strata_package	\N	1.6
set	\N	1.5			cross-strata_package	\N	2.8
set	\N	1.5			cross-strata_package	\N	0.25
set	\N	2			cross-strata_package	\N	0.25
set	\N	3			cross-strata_package	\N	0.25
set	\N	4.5			cross-strata_package	\N	1.6
set	\N	4			cross-strata_package	\N	1.6
set	\N	3.5			cross-strata_package	\N	0.6
set	\N	3			cross-strata_package	\N	1.2
set	\N	2			cross-strata_package	\N	4
set	\N	3			cross-strata_package	\N	3
					cross-strata_package	\N	8
115+A988:B1005					cross-strata_package	\N	1.5
					cross-strata_package	\N	0.5
					cross-strata_package	\N	1
					cross-strata_package	\N	1.5
					cross-strata_package	\N	3.5
					cross-strata_package	\N	0.5
					cross-strata_package	\N	4
					cross-strata_package	\N	1.5
					cross-strata_package	\N	0.45
					cross-strata_package	\N	0.45
					cross-strata_package	\N	0.35
					cross-strata_package	\N	0.35
					cross-strata_package	\N	0.25
					cross-strata_package	\N	0.25
					cross-strata_package	\N	0.1
					cross-strata_package	\N	0.25
					cross-strata_package	\N	0.25
					cross-strata_package	\N	0.25
					cross-strata_package	\N	0.25
					cross-strata_package	\N	8
					cross-strata_package	\N	2
					cross-strata_package	\N	10
					cross-strata_package	\N	15
					cross-strata_package	\N	10
					cross-strata_package	\N	1.25
					cross-strata_package	\N	1
					cross-strata_package	\N	0.8
					cross-strata_package	\N	1
					cross-strata_package	\N	0.25
					cross-strata_package	\N	0.6
					cross-strata_package	\N	0.25
					cross-strata_package	\N	0.25
					cross-strata_package	\N	5
					cross-strata_package	\N	5
					cross-strata_package	\N	2.5
					cross-strata_package	\N	2.5
					cross-strata_package	\N	2.5
					cross-strata_package	\N	4
					cross-strata_package	\N	3
					cross-strata_package	\N	5.5
					cross-strata_package	\N	7
					cross-strata_package	\N	3
					cross-strata_package	\N	3
					dune	\N	34.5
					dune	\N	34.5
					dune	\N	35
					dune	\N	20
					dune	\N	15
					dune	\N	5
					dune	\N	5
					dune	\N	5
					dune	\N	6.25
					dune	\N	20
					dune	\N	18
					dune	\N	3.75
					dune,sandsheet_undifferentiated	\N	2
					dune,sandsheet_undifferentiated	\N	1.5
					dune,sandsheet_undifferentiated	\N	2
					dune,sandsheet_undifferentiated	\N	1
					dune,sandsheet_undifferentiated	\N	2
					dune,sandsheet_undifferentiated	\N	3.5
					dune,sandsheet_undifferentiated	\N	1
					dune,sandsheet_undifferentiated	\N	3
					dune,sandsheet_undifferentiated	\N	4
					dune,sandsheet_undifferentiated	\N	2
					dune,sandsheet_undifferentiated	\N	3
					dune,sandsheet_undifferentiated	\N	3
					dune,sandsheet_undifferentiated	\N	5
					dune,sandsheet_undifferentiated	\N	3.5
					dune,sandsheet_undifferentiated	\N	0.25
					dune,sandsheet_undifferentiated	\N	2.5
					dune,sandsheet_undifferentiated	\N	22.2
					dune,sandsheet_undifferentiated	\N	0.25
					dune,sandsheet_undifferentiated	\N	0.25
					dune,sandsheet_undifferentiated	\N	1.5
					dune,sandsheet_undifferentiated	\N	3
					dune,sandsheet_undifferentiated	\N	3
					dune,sandsheet_undifferentiated	\N	0.75
					dune,sandsheet_undifferentiated	\N	2
					dune,sandsheet_undifferentiated,undifferentiated_aeolian_strata	\N	6
					dune,sandsheet_undifferentiated,undifferentiated_aeolian_strata	\N	5
					dune,sandsheet_undifferentiated,undifferentiated_aeolian_strata	\N	20
					dune,sandsheet_undifferentiated,undifferentiated_aeolian_strata	\N	6
					dune,sandsheet_undifferentiated,undifferentiated_aeolian_strata	\N	5
					dune,sandsheet_undifferentiated,undifferentiated_aeolian_strata	\N	16
					dune,sandsheet_undifferentiated,undifferentiated_aeolian_strata	\N	12.5
					dune,sandsheet_undifferentiated,undifferentiated_aeolian_strata	\N	20
					dune,sandsheet_undifferentiated,undifferentiated_aeolian_strata	\N	12.5
					dune,sandsheet_undifferentiated,undifferentiated_aeolian_strata	\N	7
					dune,sandsheet_undifferentiated,undifferentiated_aeolian_strata	\N	2.5
					dune,sandsheet_undifferentiated,undifferentiated_aeolian_strata	\N	12.5
					dune,sandsheet_undifferentiated,undifferentiated_aeolian_strata	\N	7
					dune,sandsheet_undifferentiated,undifferentiated_aeolian_strata	\N	3
					dune,sandsheet_undifferentiated,undifferentiated_aeolian_strata	\N	9
					dune,sandsheet_undifferentiated,undifferentiated_aeolian_strata	\N	15
					dune,sandsheet_undifferentiated,undifferentiated_aeolian_strata	\N	8
					dune,sandsheet_undifferentiated,undifferentiated_aeolian_strata	\N	5
					dune,sandsheet_undifferentiated,undifferentiated_aeolian_strata	\N	14
					dune,sandsheet_undifferentiated,undifferentiated_aeolian_strata	\N	6
					dune,sandsheet_undifferentiated,undifferentiated_aeolian_strata	\N	12.5
					dune,sandsheet_undifferentiated,undifferentiated_aeolian_strata	\N	4
					dune,sandsheet_undifferentiated,undifferentiated_aeolian_strata	\N	2.5
					dune,sandsheet_undifferentiated,undifferentiated_aeolian_strata	\N	0.5
					dune,sandsheet_undifferentiated,undifferentiated_aeolian_strata	\N	7.5
					dune,sandsheet_undifferentiated,undifferentiated_aeolian_strata	\N	20
					dune,sandsheet_undifferentiated,undifferentiated_aeolian_strata	\N	1.5
					dune,sandsheet_undifferentiated,undifferentiated_aeolian_strata	\N	10
					dune,sandsheet_undifferentiated,undifferentiated_aeolian_strata	\N	7
					dune,sandsheet_undifferentiated,undifferentiated_aeolian_strata	\N	2.5
					dune,sandsheet_undifferentiated,undifferentiated_aeolian_strata	\N	10
					dune,sandsheet_undifferentiated,undifferentiated_aeolian_strata	\N	1
					dune,sandsheet_undifferentiated,undifferentiated_aeolian_strata	\N	1
					dune,sandsheet_undifferentiated,undifferentiated_aeolian_strata	\N	8
					dune,sandsheet_undifferentiated,undifferentiated_aeolian_strata	\N	2
					dune,sandsheet_undifferentiated,undifferentiated_aeolian_strata	\N	2
					dune,sandsheet_undifferentiated,undifferentiated_aeolian_strata	\N	7
					dune,sandsheet_undifferentiated,undifferentiated_aeolian_strata	\N	7
					dune,sandsheet_undifferentiated,undifferentiated_aeolian_strata	\N	4
					dune,sandsheet_undifferentiated,undifferentiated_aeolian_strata	\N	7
					dune,sandsheet_undifferentiated,undifferentiated_aeolian_strata	\N	3
					dune,sandsheet_undifferentiated,undifferentiated_aeolian_strata	\N	6
					dune,sandsheet_undifferentiated,undifferentiated_aeolian_strata	\N	7
					dune,sandsheet_undifferentiated,undifferentiated_aeolian_strata	\N	4
					dune,sandsheet_undifferentiated,undifferentiated_aeolian_strata	\N	8
					dune,sandsheet_undifferentiated,undifferentiated_aeolian_strata	\N	2
					dune,sandsheet_undifferentiated,undifferentiated_aeolian_strata	\N	4
					dune,sandsheet_undifferentiated,undifferentiated_aeolian_strata	\N	4.5
					dune,sandsheet_undifferentiated,undifferentiated_aeolian_strata	\N	2
					dune,sandsheet_undifferentiated,undifferentiated_aeolian_strata	\N	1
					dune,sandsheet_undifferentiated,undifferentiated_aeolian_strata	\N	4
					dune,sandsheet_undifferentiated,undifferentiated_aeolian_strata	\N	1
					dune,sandsheet_undifferentiated,undifferentiated_aeolian_strata	\N	3
					dune,sandsheet_undifferentiated,undifferentiated_aeolian_strata	\N	2
					dune,sandsheet_undifferentiated,undifferentiated_aeolian_strata	\N	5
					dune,sandsheet_undifferentiated,undifferentiated_aeolian_strata	\N	2
					dune,sandsheet_undifferentiated,undifferentiated_aeolian_strata	\N	2
					dune,sandsheet_undifferentiated,undifferentiated_aeolian_strata	\N	0.5
					dune,sandsheet_undifferentiated,undifferentiated_aeolian_strata	\N	2
					dune,sandsheet_undifferentiated,undifferentiated_aeolian_strata	\N	4
					dune,sandsheet_undifferentiated,undifferentiated_aeolian_strata	\N	2
					dune,sandsheet_undifferentiated,undifferentiated_aeolian_strata	\N	2
					dune,sandsheet_undifferentiated,undifferentiated_aeolian_strata	\N	3
					dune,sandsheet_undifferentiated,undifferentiated_aeolian_strata	\N	3
					dune,sandsheet_undifferentiated,undifferentiated_aeolian_strata	\N	1
					dune,sandsheet_undifferentiated,undifferentiated_aeolian_strata	\N	1
					dune,set,sandsheet_undifferentiated	\N	2						270
					dune,set,sandsheet_undifferentiated	\N	1.75
					dune,set,sandsheet_undifferentiated	\N	1.75
					homgenized_reworked_aeolian	\N	4.75
					homgenized_reworked_aeolian	fluvial_sandstone	2
					homgenized_reworked_aeolian	fluvial_sandstone	1.2
					homgenized_reworked_aeolian	fluvial_sandstone	4.2
					interdune_damp	\N	1
					interdune_damp	\N	2
					interdune_damp	\N	1
					interdune_damp	\N	1
					interdune_damp	\N	1
					interdune_damp	\N	0.5
					interdune_damp	\N	0.5
					interdune_damp	\N	0.5
					interdune_damp	\N	1
					interdune_damp	\N	1
					interdune_damp	\N	1
					interdune_damp	\N	1
					interdune_damp	\N	0.5
					interdune_damp	\N	0.5
					interdune_damp	\N	1
					interdune_damp	\N	0.5
					interdune_damp	\N	0.5
					interdune_damp	\N	0.5
					interdune_damp	\N	1
					interdune_damp	\N	0.5
					interdune_damp	\N	0.75
					interdune_damp	\N	0.2
					interdune_damp	\N	0.3
					interdune_damp	\N	0.3
					interdune_damp	\N	0.9
					interdune_damp	\N	0.6
					interdune_damp	\N	7.5
					interdune_damp	\N	0.5
					interdune_damp	\N	0.5
					interdune_damp	\N	0.5
					interdune_damp	\N	0.5
					interdune_damp	\N	0.1
					interdune_damp	\N	0.1
					interdune_damp	\N	0.25
					interdune_damp	\N	0.25
					interdune_damp	\N	0.25
					interdune_damp	\N	0.2
					interdune_damp	\N	0.2
					interdune_damp	\N	0.2
					interdune_damp	\N	0.2
					interdune_damp	\N	0.25
					interdune_damp	\N	0.25
					interdune_damp	\N	0.25
					interdune_damp	\N	0.1
					interdune_damp	\N	1
					interdune_damp	\N	1.6
					interdune_damp	\N	2
					interdune_damp	\N	2
					interdune_dry	\N	10
					interdune_dry	\N	0.5
					interdune_dry	\N	0.5
					interdune_dry	\N	0.4
					interdune_dry	\N	2
					interdune_dry	\N	2
					interdune_dry	\N	1.5
					interdune_dry	\N	2.5
					interdune_dry	\N	1.4
					interdune_dry	\N	2.75
					interdune_dry	\N	2
					interdune_dry	\N	1
					interdune_dry	\N	0.2
					interdune_dry	\N	0.2
					interdune_dry	\N	0.1
					interdune_dry	\N	0.1
					interdune_dry	\N	0.2
					interdune_dry	\N	0.1
					interdune_dry	\N	0.2
					interdune_dry	\N	0.25
					interdune_dry	\N	0.15
					interdune_dry	\N	0.05
					interdune_dry	\N	0.05
					interdune_dry	\N	0.1
					interdune_dry	\N	0.2
					interdune_dry	\N	0.15
					interdune_dry	\N	0.01
					interdune_dry	\N	0.04
					interdune_dry	\N	0.2
					interdune_dry	\N	0.2
					interdune_dry	\N	0.075
					interdune_dry	\N	0.05
					interdune_dry	\N	0.3
					interdune_dry	\N	0.1
					interdune_dry	\N	0.6
					interdune_dry	\N	0.15
					interdune_dry	\N	0.9
					interdune_dry	\N	0.15
					interdune_dry	\N	0.15
					interdune_dry	\N	2
					interdune_dry	\N	1
					interdune_dry	\N	12
					interdune_dry	\N	7
					interdune_dry	\N	6
					interdune_undifferentiated	\N	10
					interdune_undifferentiated	\N	0.5
					interdune_undifferentiated	\N	0.5
					interdune_undifferentiated	\N	1
					interdune_undifferentiated	\N	2
					interdune_undifferentiated	\N	2
					interdune_wet	\N	0.5
					interdune_wet	\N	0.5
					interdune_wet	\N	0.25
					interdune_wet	\N	0.25
					interdune_wet	\N	0.25
					interdune_wet	\N	2
					interdune_wet	\N	0.75
					interdune_wet	\N	0.5
					interdune_wet	\N	2
					interdune_wet	\N	0.1
					interdune_wet	\N	0.5
					interdune_wet	\N	1.5
					interdune_wet	\N	2.5
					interdune_wet	\N	0.25
					interdune_wet	\N	0.2
					interdune_wet	\N	0.2
					interdune_wet	\N	0.2
					interdune_wet	\N	0.1
					interdune_wet	\N	1.5
					interdune_wet	\N	1
					interdune_wet	\N	0.1
					interdune_wet	\N	5
					interdune_wet	\N	7.5
					interdune_wet	\N	0.4
					interdune_wet	\N	1
					interdune_wet	\N	1.2
					interdune_wet	\N	2.1
					interdune_wet	\N	0.3
					interdune_wet	\N	0.3
					interdune_wet	\N	0.3
					interdune_wet	\N	0.3
					interdune_wet	\N	0.3
					interdune_wet	\N	4
					interdune_wet	\N	12
					interdune_wet	\N	0.1
					interdune_wet	\N	0.05
					interdune_wet	\N	0.15
					interdune_wet	\N	0.1
					interdune_wet	\N	0.15
					interdune_wet	\N	0.1
					interdune_wet	\N	0.2
					interdune_wet	\N	0.15
					interdune_wet	\N	0.1
					interdune_wet	\N	0.1
					interdune_wet	\N	0.15
					interdune_wet	\N	0.5
					interdune_wet	\N	0.5
					interdune_wet	\N	0.25
					interdune_wet	\N	0.05
					interdune_wet	\N	0.05
					sandsheet_undifferentiated	\N	0.25
					sandsheet_undifferentiated	\N	1
					sandsheet_undifferentiated	\N	0.75
					sandsheet_undifferentiated	\N	0.75
					sandsheet_undifferentiated	\N	0.75
					sandsheet_undifferentiated	\N	1
					sandsheet_undifferentiated	\N	1
					sandsheet_undifferentiated	\N	0.75
					sandsheet_undifferentiated	\N	0.5
					sandsheet_undifferentiated	\N	0.75
					sandsheet_undifferentiated	\N	0.5
					sandsheet_undifferentiated	\N	0.5
					sandsheet_undifferentiated	\N	1.5
					sandsheet_undifferentiated	\N	1.5
					sandsheet_undifferentiated	\N	1
					sandsheet_undifferentiated	\N	1
					sandsheet_undifferentiated	\N	5
					sandsheet_undifferentiated	\N	7
					sandsheet_undifferentiated	\N	0.1
					sandsheet_undifferentiated	148+F1307:F1329	0.1
					sandsheet_undifferentiated	\N	1
					sandsheet_undifferentiated	\N	1
					sandsheet_undifferentiated	\N	6.5
					sandsheet_undifferentiated	\N	0.9
					sandsheet_undifferentiated	\N	1.5
					sandsheet_undifferentiated	\N	1.3
					sandsheet_undifferentiated	\N	0.5
					sandsheet_undifferentiated	\N	0.75
					sandsheet_undifferentiated	\N	0.25
					sandsheet_undifferentiated	\N	2
					sandsheet_undifferentiated	\N	0.5
					sandsheet_undifferentiated	\N	0.2
					sandsheet_undifferentiated	\N	0.2
					sandsheet_undifferentiated	\N	0.5
					sandsheet_undifferentiated	\N	0.2
					sandsheet_undifferentiated	\N	1.2
					sandsheet_undifferentiated	\N	2
					sandsheet_undifferentiated	\N	2
					sandsheet_undifferentiated	\N	0.2
					sandsheet_undifferentiated	\N	1.5
					sandsheet_undifferentiated	\N	1
					sandsheet_undifferentiated	\N	1.5
					sandsheet_undifferentiated	\N	2
					sandsheet_undifferentiated	\N	2
					sandsheet_undifferentiated	\N	1.5
					sandsheet_undifferentiated	\N	2
					sandsheet_undifferentiated	\N	0.75
					sandsheet_undifferentiated	\N	0.75
					sandsheet_undifferentiated	\N	4
					sandsheet_undifferentiated	\N	4
					sandsheet_undifferentiated	\N	2
					sandsheet_undifferentiated	\N	3
					sandsheet_undifferentiated	\N	2
					sandsheet_undifferentiated	\N	10
					sandsheet_undifferentiated	\N	1
					sandsheet_undifferentiated	\N	7
					sandsheet_undifferentiated	\N	1.5
					sandsheet_undifferentiated	\N	2
					sandsheet_undifferentiated	\N	4
					sandsheet_undifferentiated	\N	0.5
					sandsheet_undifferentiated	\N	2
					sandsheet_undifferentiated	\N	2
					sandsheet_undifferentiated	\N	1
					sandsheet_undifferentiated	\N	3.8
					sandsheet_undifferentiated	\N	0.3
					sandsheet_undifferentiated	\N	0.2
					sandsheet_undifferentiated	\N	0.5
					sandsheet_undifferentiated	\N	0.2
					sandsheet_undifferentiated	\N	0.4
					sandsheet_undifferentiated	\N	0.4
					sandsheet_undifferentiated	\N	0.2
					sandsheet_undifferentiated	\N	0.3
					sandsheet_undifferentiated	\N	0.9
					sandsheet_undifferentiated	\N	1.25
					sandsheet_undifferentiated	\N	1.25
					sandsheet_undifferentiated	\N	0.2
					sandsheet_undifferentiated	\N	1
					sandsheet_undifferentiated	\N	0.3
					sandsheet_undifferentiated	\N	0.6
					sandsheet_undifferentiated	\N	1
					sandsheet_undifferentiated	\N	1
					sandsheet_undifferentiated	\N	1.5
					sandsheet_undifferentiated	\N	1
					sandsheet_undifferentiated	\N	2.5
					sandsheet_undifferentiated	\N	3
					sandsheet_undifferentiated	\N	2
					sandsheet_undifferentiated	\N	0.6
					sandsheet_undifferentiated	\N	0.3
					sandsheet_undifferentiated	\N	1.9
					sandsheet_undifferentiated	\N	1.1
					sandsheet_undifferentiated	\N	0.76
					sandsheet_undifferentiated	\N	0.76
					sandsheet_undifferentiated	\N	0.91
					sandsheet_undifferentiated	\N	1.25
					sandsheet_undifferentiated	\N	1.25
					sandsheet_undifferentiated	\N	1
					sandsheet_undifferentiated	\N	2
					sandsheet_undifferentiated	\N	1
					sandsheet_undifferentiated	\N	1
					sandsheet_undifferentiated	\N	2
					sandsheet_undifferentiated	\N	2
					sandsheet_undifferentiated	\N	1.25
					sandsheet_undifferentiated	\N	2
					sandsheet_undifferentiated	\N	1
					sandsheet_undifferentiated	\N	0.1
					sandsheet_undifferentiated	\N	0.2
					sandsheet_undifferentiated	\N	0.1
					sandsheet_undifferentiated	\N	0.3
					sandsheet_undifferentiated	\N	0.05
					sandsheet_undifferentiated	\N	0.05
					sandsheet_undifferentiated	\N	0.25
					sandsheet_undifferentiated	\N	0.1
					sandsheet_undifferentiated	\N	0.2
					sandsheet_undifferentiated	\N	0.05
					sandsheet_undifferentiated	\N	0.1
					sandsheet_undifferentiated	\N	0.35
					sandsheet_undifferentiated	\N	0.05
					sandsheet_undifferentiated	\N	0.05
					sandsheet_undifferentiated	\N	0.05
					sandsheet_undifferentiated	\N	0.2
					sandsheet_undifferentiated	\N	1.5
					sandsheet_undifferentiated	\N	0.5
					sandsheet_undifferentiated	\N	1
					sandsheet_undifferentiated	\N	3
					sandsheet_undifferentiated	\N	0.5
					sandsheet_undifferentiated	\N	0.5
					sandsheet_undifferentiated	\N	1
					sandsheet_undifferentiated	\N	2
					sandsheet_undifferentiated	\N	3
					sandsheet_undifferentiated	\N	0.5
					sandsheet_undifferentiated	\N	0.5
					sandsheet_undifferentiated	\N	1.5
					sandsheet_undifferentiated	\N	0.5
					sandsheet_undifferentiated	\N	2
					sandsheet_undifferentiated	\N	3
					sandsheet_undifferentiated	\N	1
					sandsheet_undifferentiated	\N	1.5
					sandsheet_undifferentiated	\N	1.5
					sandsheet_undifferentiated	\N	0.5
					sandsheet_undifferentiated	\N	0.5
					sandsheet_undifferentiated	\N	1
					sandsheet_undifferentiated	\N	0.5
					sandsheet_undifferentiated	\N	0.5
					sandsheet_undifferentiated	\N	0.5
					sandsheet_undifferentiated	\N	2
					sandsheet_undifferentiated	\N	4
					sandsheet_undifferentiated	\N	2
					sandsheet_undifferentiated	\N	1
					sandsheet_undifferentiated	\N	1
					sandsheet_undifferentiated	\N	4
					sandsheet_undifferentiated	\N	1
					sandsheet_undifferentiated	\N	0.25
					sandsheet_undifferentiated	\N	0.5
					sandsheet_undifferentiated	\N	0.25
					sandsheet_undifferentiated	\N	2.5
					sandsheet_undifferentiated	\N	1
					sandsheet_undifferentiated	\N	1.25
					sandsheet_undifferentiated	\N	0.5
					sandsheet_undifferentiated	\N	0.5
					sandsheet_undifferentiated	\N	0.75
					sandsheet_undifferentiated	\N	1.5
					sandsheet_undifferentiated	\N	0.75
					sandsheet_undifferentiated	\N	1.5
					sandsheet_undifferentiated	\N	0.5
					sandsheet_undifferentiated	\N	0.5
					sandsheet_undifferentiated	\N	4
					sandsheet_undifferentiated	\N	0.25
					sandsheet_undifferentiated	\N	0.25
					sandsheet_undifferentiated	\N	0.25
					sandsheet_undifferentiated	\N	1
					sandsheet_undifferentiated	\N	0.25
					sandsheet_undifferentiated	\N	1.25
					sandsheet_undifferentiated	\N	0.25
					sandsheet_undifferentiated	\N	0.75
					sandsheet_undifferentiated	\N	1.5
					sandsheet_undifferentiated	\N	1.25
					sandsheet_undifferentiated	\N	1.25
					sandsheet_undifferentiated	\N	0.15
					sandsheet_undifferentiated	\N	0.5
					sandsheet_undifferentiated	\N	2.5
					sandsheet_undifferentiated	\N	0.15
					sandsheet_undifferentiated	\N	2
					sandsheet_undifferentiated	\N	0.5
					sandsheet_undifferentiated	\N	0.5
					sandsheet_undifferentiated	\N	0.5
					sandsheet_undifferentiated	\N	1
					sandsheet_undifferentiated	\N	1
					sandsheet_undifferentiated	\N	2
					sandsheet_undifferentiated	\N	1.9
					sandsheet_undifferentiated	\N	0.75
					sandsheet_undifferentiated	\N	0.75
					sandsheet_undifferentiated	\N	0.5
					sandsheet_undifferentiated	\N	1.3
					sandsheet_undifferentiated	\N	0.25
					sandsheet_undifferentiated	\N	0.5
					sandsheet_undifferentiated	\N	0.3
					sandsheet_undifferentiated	\N	0.5
					sandsheet_undifferentiated	\N	0.2
					sandsheet_undifferentiated	\N	0.1
					sandsheet_undifferentiated	\N	0.25
					sandsheet_undifferentiated	\N	0.1
					sandsheet_undifferentiated	\N	0.25
					sandsheet_undifferentiated	\N	0.1
					sandsheet_undifferentiated	\N	0.1
					sandsheet_undifferentiated	\N	0.1
					sandsheet_undifferentiated	\N	0.6
					sandsheet_undifferentiated	\N	0.8
					sandsheet_undifferentiated	\N	0.75
					sandsheet_undifferentiated	\N	0.1
					sandsheet_undifferentiated	\N	0.25
					sandsheet_undifferentiated	\N	0.5
					sandsheet_undifferentiated	\N	0.9
					sandsheet_undifferentiated	\N	0.25
					sandsheet_undifferentiated	\N	2
					sandsheet_undifferentiated	\N	2
					sandsheet_undifferentiated	\N	3
					sandsheet_undifferentiated	\N	4.5
					sandsheet_undifferentiated	\N	3
					sandsheet_undifferentiated	\N	5
					sandsheet_undifferentiated	\N	3.5
					sandsheet_undifferentiated	\N	1.1
					sandsheet_undifferentiated	\N	3.4
					sandsheet_undifferentiated	\N	16.5
					sandsheet_undifferentiated	\N	6
					sandsheet_undifferentiated	\N	2.5
					sandsheet_undifferentiated	\N	4
					sandsheet_undifferentiated	\N	2.5
					sandsheet_undifferentiated	\N	8
					sandsheet_undifferentiated	\N	3.5
					sandsheet_undifferentiated	\N	3.5
					sandsheet_undifferentiated	\N	2.25
					sandsheet_undifferentiated	\N	4.25
					sandsheet_undifferentiated	\N	2
					sandsheet_undifferentiated	\N	5
					sandsheet_undifferentiated	\N	2
					sandsheet_undifferentiated	\N	4
					sandsheet_undifferentiated	\N	7.5
					sandsheet_undifferentiated	\N	3
					sandsheet_undifferentiated	\N	2
					sandsheet_undifferentiated,interdune_damp	\N	1.5
					sandsheet_undifferentiated,interdune_damp	\N	1.5
					sandsheet_undifferentiated,interdune_damp	\N	1.5
					sandsheet_undifferentiated,interdune_damp	\N	1.5
					sandsheet_undifferentiated,interdune_damp	\N	1.5
					sandsheet_undifferentiated,interdune_dry	\N	2
					sandsheet_undifferentiated,interdune_dry	\N	0.5
					sandsheet_undifferentiated,interdune_dry	\N	25
					sandsheet_undifferentiated,interdune_dry,homgenized_reworked_aeolian	\N	1
					sandsheet_undifferentiated,sandsheet_zibar	\N	3
					sandsheet_undifferentiated,sandsheet_zibar	\N	0.75
					sandsheet_undifferentiated,sandsheet_zibar	\N	2
					sandsheet_undifferentiated,sandsheet_zibar	\N	0.5
					sandsheet_undifferentiated,sandsheet_zibar	\N	2
					sandsheet_undifferentiated,sandsheet_zibar	\N	3
					sandsheet_undifferentiated,sandsheet_zibar	\N	2.5
					sandsheet_undifferentiated,sandsheet_zibar	\N	1.5
					sandsheet_undifferentiated,sandsheet_zibar	\N	1.5
					sandsheet_undifferentiated,sandsheet_zibar	\N	2.5
					sandsheet_undifferentiated,sandsheet_zibar	\N	10
					sandsheet_undifferentiated,sandsheet_zibar	\N	2
					sandsheet_undifferentiated,sandsheet_zibar	\N	8
					sandsheet_undifferentiated,sandsheet_zibar	\N	0.5
					sandsheet_undifferentiated,sandsheet_zibar	\N	0.75
					sandsheet_undifferentiated,sandsheet_zibar	\N	1
					sandsheet_undifferentiated,sandsheet_zibar	\N	11
					sandsheet_undifferentiated,sandsheet_zibar	\N	2
					sandsheet_undifferentiated,sandsheet_zibar	\N	3
					sandsheet_zibar	\N	2
					sandsheet_zibar	\N	0.5
					sandsheet_zibar	\N	0.5
					sandsheet_zibar	\N	0.5
					sandsheet_zibar	\N	1.5
					sandsheet_zibar	\N	1
					sandsheet_zibar	\N	2
					sandsheet_zibar	\N	0.75
					sandsheet_zibar	\N	2.5
					sandsheet_zibar	\N	3
					sandsheet_zibar	\N	4
					sandsheet_zibar	\N	3
					sandsheet_zibar	\N	1.75
					sandsheet_zibar	\N	1
					sandsheet_zibar	\N	1.5
					sandsheet_zibar	\N	2
					set	\N	2.5
					set	\N	2
					set	\N	4
					set	\N	2
					set	\N	5
					set	\N	3
					set	\N	2.5
					set	\N	3
					set	\N	8
					set	\N	10
					set	\N	2.5
					set	\N	3
					set	\N	5
					set	\N	2
					set	\N	5
					set	\N	5
					set	\N	5
					set	\N	5
					set	\N	5
					set	\N	2
					set	\N	2
					set	\N	7.5
					set	\N	2.5
					set	\N	7.5
					set	\N	5
					set	\N	10
					set	\N	12
					set	\N	5
					set	\N	0.5
					set	\N	1.5
					set	\N	5
					set	\N	15
					set	\N	1
					set	\N	4
					set	\N	3
					set	\N	2
					set	\N	2
					set	\N	3
					set	\N	10
					set	\N	1
					set	\N	2.5
					set	\N	12
					set	\N	3
					set	\N	9
					set	\N	1
					set	\N	16
					set	\N	4
					set	\N	9
					set	\N	5
					set	\N	6.5
					set	\N	7
					set	\N	3
					set	\N	9
					set	\N	3
					set	\N	2.5
					set	\N	5
					set	\N	7
					set	\N	2
					set	\N	3
					set	\N	4
					set	\N	2
					set	\N	2
					set	\N	4
					set	\N	20
					set	\N	20
					set	\N	20
					set	\N	20
					set	\N	20
					set	\N	20
					set	\N	18
					set	\N	22
					set	\N	10
					set	\N	4
					set	\N	4
					set	\N	3
					set	\N	3
					set	\N	3
					set	\N	3
					set	\N	5
					set	\N	0.75
					set	\N	1.5
					set	\N	1.25
					set	\N	1.5
					set	\N	1.75
					set	\N	1.5
					set	\N	1.75
					set	\N	2
					set	\N	1.5
					set	\N	8
					set	\N	1
					set	\N	2.5
					set	\N	1
					set	\N	2.5
					set	\N	2
					set	\N	2
					set	\N	1.5
					set	\N	1.5
					set	\N	2
					set	\N	1
					set	\N	2.5
					set	\N	0.25
					set	\N	2.5
					set	\N	2.5
					set	\N	1.5
					set	\N	1
					set	\N	1.5
					set	\N	4
					set	\N	2
					set	\N	3
					set	\N	1
					set	\N	5
					set	\N	2
					set	\N	2
					set	\N	2
					set	\N	6
					set	\N	1
					set	\N	1
					set	\N	1
					set	\N	2
					set	\N	3
					set	\N	2
					set	\N	2
					set	\N	3
					set	\N	2
					set	\N	3
					set	\N	5
					set	\N	1
					set	\N	2
					set	\N	2
					set	\N	4
					set	\N	1
					set	\N	1
					set	\N	4
					set	\N	6
					set	\N	4
					set	\N	2
					set	\N	3
					set	\N	1
					set	\N	1
					set	\N	2
					set	\N	1.5
					set	\N	2
					set	\N	2
					set	\N	1.5
					set	\N	1
					set	\N	2
					set	\N	2
					set	\N	2
					set	\N	2
					set	\N	2
					set	\N	4
					set	\N	4
					set	\N	1
					set	\N	0.75
					set	\N	4
					set	\N	0.75
					set	\N	1
					set	\N	15
					set	\N	35
					set	\N	25
					set	\N	5
					set	\N	5
					set	\N	5
					set	\N	30
					set	\N	5
					set	\N	5
					set	\N	5
					set	\N	5
					set	\N	5
					set	\N	5
					set	\N	25
					set	\N	10
					set	\N	35
					set	\N	35
					set	\N	35
					set	\N	25
					set	\N	20
					set	\N	12
					set	\N	3
					set	\N	3
					set	\N	6
					set	\N	1.5
					set	\N	15
					set	\N	3
					set	\N	8
					set	\N	10
					set	\N	10
					set	\N	10
					set	\N	10
					set	\N	5
					set	\N	3
					set	\N	2
					set	\N	2
					set	\N	0.5
					set	\N	0.5
					set	\N	3
					set	\N	1.5
					set	\N	0.75
					set	\N	1
					set	\N	0.25
					set	\N	0.75
					set	\N	0.5
					set	\N	0.2
					set	\N	0.4
					set	\N	0.4
					set	\N	0.4
					set	\N	0.4
					set	\N	0.5
					set	\N	1.5
					set	\N	1.5
					set	\N	0.8
					set	\N	0.8
					set	\N	0.8
					set	\N	0.8
					set	\N	0.8
					set	\N	1
					set	\N	1
					set	\N	0.6
					set	\N	2.6
					set	\N	2.25
					set	\N	1
					set	\N	2.5
					set	\N	1.25
					set	\N	0.75
					set	\N	1.25
					set	\N	0.6
					set	\N	0.6
					set	\N	0.5
					set	\N	0.5
					set	\N	2
					set	\N	0.5
					set	\N	0.5
					set	\N	0.7
					set	\N	0.25
					set	\N	2
					set	\N	2
					set	\N	2
					set	\N	1
					set	\N	1
					set	\N	0.75
					set	\N	0.75
					set	\N	1.5
					set	\N	2
					set	\N	2
					set	\N	1.8
					set	\N	1.8
					set	\N	2
					set	\N	2
					set	\N	1.8
					set	\N	1.8
					set	\N	1.8
					set	\N	1.8
					set	\N	1.8
					set	\N	1.2
					set	\N	1.5
					set	\N	1.5
					set	\N	3
					set	\N	1
					set	\N	2
					set	\N	1.5
					set	\N	1.5
					set	\N	2.5
					set	\N	1.5
					set	\N	1.5
					set	\N	1.5
					set	\N	2.25
					set	\N	1
					set	\N	0.3
					set	\N	0.4
					set	\N	0.15
					set	\N	0.25
					set	\N	0.2
					set	\N	0.2
					set	\N	2
					set	\N	2
					set	\N	1.5
					set	\N	3.5
					set	\N	2
					set	\N	1.8
					set	\N	0.6
					set	\N	1.2
					set	\N	0.5
					set	\N	0.5
					set	\N	0.7
					set	\N	1
					set	\N	0.85
					set	\N	2.4
					set	\N	1.6
					set	\N	1
					set	\N	0.9
					set	\N	1.52
					set	\N	4.57
					set	\N	0.6
					set	\N	0.6
					set	\N	0.4
					set	\N	0.9
					set	\N	1.5
					set	\N	0.6
					set	\N	0.6
					set	\N	1.7
					set	\N	0.6
					set	\N	3.3
					set	\N	1.5
					set	\N	15
					set	\N	4.5
					set	\N	15
					set	\N	3.5
					set	\N	4
					set	\N	5
					set	\N	7
					set	\N	7
					set	\N	2
					set	\N	1.75
					set	\N	1.75
					set	\N	1
					set	\N	25
					set	\N	3
					set	\N	8
					set	\N	3
					set	\N	2
					set	\N	2
					set	\N	1
					set	\N	2
					set	\N	15
					set	\N	15
					set	\N	3
					set	\N	7
					set	\N	3
					set	\N	3
					set	\N	5
					set	\N	2
					set	\N	5
					set	\N	1.5
					set	\N	7.5
					set	\N	7.5
					set	\N	12.5
					set	\N	15
					set	\N	15
					set	\N	20
					set	\N	4
					set	\N	20
					set	\N	4
					set	\N	22
					set	\N	26
					set	\N	29
					set	\N	30
					set	\N	11
					set	\N	6
					set	\N	8
					set	\N	10
					set	\N	12
					set	\N	20
					set	\N	5
					set	\N	12
					set	\N	7.5
					set	\N	7.5
					set	\N	12
					set	\N	12
					set	\N	7.5
					set	\N	3.75
					set	\N	3.75
					set	\N	3.75
					set	\N	8.75
					set	\N	14
					set	\N	14.75
					set	\N	16
					set	\N	14
					set	\N	2.5
					set	\N	4
					set	\N	3.5
					set	\N	3
					set	\N	6
					set	\N	5
					set	\N	7
					set	\N	3.75
					set	\N	5.5
					set	\N	3.5
					set	\N	3.75
					set	\N	1.4
					set	\N	1.4
					set	\N	1.5
					set	\N	1.5
					set	\N	1
					set	\N	1.25
					set	\N	1.75
					set	\N	1
					set	\N	1
					set	\N	1
					set	\N	1.5
					set	\N	1
					set	\N	2
					set	\N	4
					set	\N	6
					set	\N	5
					set	\N	6
					set	\N	3
					set	\N	6
					set	\N	3
					set	\N	6
					set	\N	2
					set	\N	7
					set	\N	3
					set	\N	3
					set	\N	1
					set	\N	15
					set	\N	2
					set	\N	5.5
					set	\N	4.5
					set	\N	3
					set	\N	2
[truncated: 241 more rows]

## Sheet: Figure 10
GROUP 1	GROUP 2	GROUP 3
airfall_lamination,grainflow_cross-strata	airfall_lamination	airfall_lamination,grainflow_cross-strata						GROUP 1
airfall_lamination,grainflow_cross-strata	airfall_lamination	airfall_lamination,grainflow_cross-strata					containing wind-ripple	129
airfall_lamination,grainflow_cross-strata	airfall_lamination	airfall_lamination,grainflow_cross-strata					grainfall/grainflow	83
airfall_lamination,grainflow_cross-strata	airfall_lamination	airfall_lamination,grainflow_cross-strata
airfall_lamination,grainflow_cross-strata,inter-fingered_strata	airfall_lamination	airfall_lamination,grainflow_cross-strata						GROUP 2
airfall_lamination,grainflow_cross-strata,inter-fingered_strata	airfall_lamination	airfall_lamination,grainflow_cross-strata					containing wind-ripple	215
airfall_lamination,grainflow_cross-strata,inter-fingered_strata	airfall_lamination	airfall_lamination,grainflow_cross-strata					grainfall/grainflow	132
airfall_lamination,grainflow_cross-strata,inter-fingered_strata	airfall_lamination	airfall_lamination,grainflow_cross-strata
airfall_lamination,grainflow_cross-strata,inter-fingered_strata	airfall_lamination	airfall_lamination,grainflow_cross-strata						GROUP 3
airfall_lamination,grainflow_cross-strata,inter-fingered_strata	airfall_lamination	airfall_lamination,grainflow_cross-strata					containing wind-ripple	37
airfall_lamination,grainflow_cross-strata,inter-fingered_strata	airfall_lamination	airfall_lamination,grainflow_cross-strata					grainfall/grainflow	122
airfall_lamination,grainflow_cross-strata,inter-fingered_strata	airfall_lamination	airfall_lamination,grainflow_cross-strata
airfall_lamination,grainflow_cross-strata,inter-fingered_strata	airfall_lamination	airfall_lamination,grainflow_cross-strata
airfall_lamination,grainflow_cross-strata,inter-fingered_strata	airfall_lamination	airfall_lamination,grainflow_cross-strata
airfall_lamination,grainflow_cross-strata,inter-fingered_strata	airfall_lamination	airfall_lamination,grainflow_cross-strata
airfall_lamination,grainflow_cross-strata,inter-fingered_strata	airfall_lamination	airfall_lamination,grainflow_cross-strata
airfall_lamination,grainflow_cross-strata,inter-fingered_strata	airfall_lamination	airfall_lamination,grainflow_cross-strata
airfall_lamination,grainflow_cross-strata,inter-fingered_strata	airfall_lamination	airfall_lamination,grainflow_cross-strata
airfall_lamination,grainflow_cross-strata,inter-fingered_strata	airfall_lamination	airfall_lamination,grainflow_cross-strata
airfall_lamination,grainflow_cross-strata,inter-fingered_strata	airfall_lamination	airfall_lamination,grainflow_cross-strata
airfall_lamination,grainflow_cross-strata,inter-fingered_strata	airfall_lamination	airfall_lamination,grainflow_cross-strata
airfall_lamination,grainflow_cross-strata,inter-fingered_strata	airfall_lamination	airfall_lamination,grainflow_cross-strata
airfall_lamination,grainflow_cross-strata,inter-fingered_strata	airfall_lamination	airfall_lamination,grainflow_cross-strata
airfall_lamination,grainflow_cross-strata,inter-fingered_strata	airfall_lamination	airfall_lamination,grainflow_cross-strata
airfall_lamination,grainflow_cross-strata,inter-fingered_strata	airfall_lamination	airfall_lamination,grainflow_cross-strata
airfall_lamination,grainflow_cross-strata,inter-fingered_strata	airfall_lamination	airfall_lamination,grainflow_cross-strata
airfall_lamination,grainflow_cross-strata,inter-fingered_strata	airfall_lamination	airfall_lamination,grainflow_cross-strata
airfall_lamination,grainflow_cross-strata,inter-fingered_strata	airfall_lamination	airfall_lamination,grainflow_cross-strata
airfall_lamination,grainflow_cross-strata,inter-fingered_strata	airfall_lamination	airfall_lamination,grainflow_cross-strata
airfall_lamination,grainflow_cross-strata,inter-fingered_strata	airfall_lamination,grainflow_cross-strata	airfall_lamination,grainflow_cross-strata
airfall_lamination,grainflow_cross-strata,inter-fingered_strata	airfall_lamination,grainflow_cross-strata	airfall_lamination,grainflow_cross-strata
airfall_lamination,grainflow_cross-strata,inter-fingered_strata	airfall_lamination,grainflow_cross-strata	airfall_lamination,grainflow_cross-strata
airfall_lamination,grainflow_cross-strata,inter-fingered_strata	airfall_lamination,grainflow_cross-strata	airfall_lamination,grainflow_cross-strata
airfall_lamination,grainflow_cross-strata,inter-fingered_strata	airfall_lamination,grainflow_cross-strata	airfall_lamination,grainflow_cross-strata
airfall_lamination,grainflow_cross-strata,inter-fingered_strata	airfall_lamination,grainflow_cross-strata	airfall_lamination,grainflow_cross-strata
airfall_lamination,grainflow_cross-strata,inter-fingered_strata	airfall_lamination,grainflow_cross-strata	airfall_lamination,grainflow_cross-strata
airfall_lamination,grainflow_cross-strata,inter-fingered_strata	airfall_lamination,grainflow_cross-strata	airfall_lamination,grainflow_cross-strata
airfall_lamination,grainflow_cross-strata,inter-fingered_strata	airfall_lamination,grainflow_cross-strata	airfall_lamination,grainflow_cross-strata
airfall_lamination,grainflow_cross-strata,inter-fingered_strata	airfall_lamination,grainflow_cross-strata	airfall_lamination,grainflow_cross-strata
airfall_lamination,grainflow_cross-strata,inter-fingered_strata	airfall_lamination,grainflow_cross-strata	airfall_lamination,grainflow_cross-strata
airfall_lamination,grainflow_cross-strata,inter-fingered_strata	airfall_lamination,grainflow_cross-strata	airfall_lamination,grainflow_cross-strata
airfall_lamination,grainflow_cross-strata,inter-fingered_strata	airfall_lamination,grainflow_cross-strata	airfall_lamination,grainflow_cross-strata
airfall_lamination,grainflow_cross-strata,inter-fingered_strata	airfall_lamination,grainflow_cross-strata	airfall_lamination,grainflow_cross-strata
airfall_lamination,grainflow_cross-strata,inter-fingered_strata	airfall_lamination,grainflow_cross-strata	airfall_lamination,grainflow_cross-strata
airfall_lamination,grainflow_cross-strata,inter-fingered_strata	airfall_lamination,grainflow_cross-strata	airfall_lamination,grainflow_cross-strata
airfall_lamination,grainflow_cross-strata,inter-fingered_strata	airfall_lamination,grainflow_cross-strata	airfall_lamination,grainflow_cross-strata
airfall_lamination,grainflow_cross-strata,inter-fingered_strata	airfall_lamination,grainflow_cross-strata	airfall_lamination,grainflow_cross-strata
airfall_lamination,grainflow_cross-strata,inter-fingered_strata	airfall_lamination,grainflow_cross-strata	airfall_lamination,grainflow_cross-strata
airfall_lamination,grainflow_cross-strata,inter-fingered_strata	airfall_lamination,grainflow_cross-strata,inter-fingered_strata	airfall_lamination,grainflow_cross-strata
airfall_lamination,grainflow_cross-strata,inter-fingered_strata	airfall_lamination,grainflow_cross-strata,inter-fingered_strata	airfall_lamination,grainflow_cross-strata
airfall_lamination,grainflow_cross-strata,inter-fingered_strata	airfall_lamination,grainflow_cross-strata,inter-fingered_strata	airfall_lamination,grainflow_cross-strata
airfall_lamination,grainflow_cross-strata,inter-fingered_strata	airfall_lamination,grainflow_cross-strata,inter-fingered_strata	airfall_lamination,grainflow_cross-strata
airfall_lamination,grainflow_cross-strata,inter-fingered_strata	airfall_lamination,grainflow_cross-strata,inter-fingered_strata	airfall_lamination,grainflow_cross-strata
airfall_lamination,grainflow_cross-strata,inter-fingered_strata	airfall_lamination,grainflow_cross-strata,inter-fingered_strata	airfall_lamination,grainflow_cross-strata
airfall_lamination,grainflow_cross-strata,inter-fingered_strata	airfall_lamination,grainflow_cross-strata,inter-fingered_strata	airfall_lamination,grainflow_cross-strata
airfall_lamination,grainflow_cross-strata,inter-fingered_strata	airfall_lamination,grainflow_cross-strata,inter-fingered_strata	airfall_lamination,grainflow_cross-strata
airfall_lamination,grainflow_cross-strata,inter-fingered_strata	airfall_lamination,grainflow_cross-strata,inter-fingered_strata	airfall_lamination,grainflow_cross-strata
airfall_lamination,grainflow_cross-strata,inter-fingered_strata	airfall_lamination,grainflow_cross-strata,inter-fingered_strata	airfall_lamination,grainflow_cross-strata
airfall_lamination,grainflow_cross-strata,inter-fingered_strata	airfall_lamination,grainflow_cross-strata,inter-fingered_strata	airfall_lamination,grainflow_cross-strata
airfall_lamination,grainflow_cross-strata,inter-fingered_strata	airfall_lamination,grainflow_cross-strata,inter-fingered_strata	airfall_lamination,grainflow_cross-strata
airfall_lamination,grainflow_cross-strata,inter-fingered_strata	airfall_lamination,grainflow_cross-strata,inter-fingered_strata	airfall_lamination,grainflow_cross-strata
airfall_lamination,grainflow_cross-strata,inter-fingered_strata	airfall_lamination,grainflow_cross-strata,inter-fingered_strata	airfall_lamination,grainflow_cross-strata
airfall_lamination,grainflow_cross-strata,inter-fingered_strata	airfall_lamination,grainflow_cross-strata,inter-fingered_strata	airfall_lamination,grainflow_cross-strata
airfall_lamination,grainflow_cross-strata,inter-fingered_strata	airfall_lamination,grainflow_cross-strata,inter-fingered_strata	airfall_lamination,grainflow_cross-strata
airfall_lamination,grainflow_cross-strata,inter-fingered_strata	airfall_lamination,grainflow_cross-strata,inter-fingered_strata	airfall_lamination,grainflow_cross-strata
airfall_lamination,grainflow_cross-strata,inter-fingered_strata	airfall_lamination,grainflow_cross-strata,inter-fingered_strata	airfall_lamination,grainflow_cross-strata
airfall_lamination,grainflow_cross-strata,inter-fingered_strata	airfall_lamination,grainflow_cross-strata,inter-fingered_strata	airfall_lamination,grainflow_cross-strata
grainflow_cross-strata	airfall_lamination,grainflow_cross-strata,inter-fingered_strata	airfall_lamination,grainflow_cross-strata
grainflow_cross-strata	airfall_lamination,grainflow_cross-strata,inter-fingered_strata	airfall_lamination,grainflow_cross-strata
grainflow_cross-strata	airfall_lamination,grainflow_cross-strata,inter-fingered_strata	airfall_lamination,grainflow_cross-strata
grainflow_cross-strata	airfall_lamination,grainflow_cross-strata,inter-fingered_strata	airfall_lamination,grainflow_cross-strata
grainflow_cross-strata	airfall_lamination,grainflow_cross-strata,inter-fingered_strata	airfall_lamination,grainflow_cross-strata
grainflow_cross-strata	airfall_lamination,grainflow_cross-strata,inter-fingered_strata	airfall_lamination,grainflow_cross-strata
grainflow_cross-strata	airfall_lamination,grainflow_cross-strata,inter-fingered_strata	airfall_lamination,grainflow_cross-strata
grainflow_cross-strata	airfall_lamination,grainflow_cross-strata,inter-fingered_strata	airfall_lamination,grainflow_cross-strata
grainflow_cross-strata	airfall_lamination,grainflow_cross-strata,inter-fingered_strata	airfall_lamination,grainflow_cross-strata
grainflow_cross-strata	airfall_lamination,grainflow_cross-strata,inter-fingered_strata	airfall_lamination,grainflow_cross-strata
grainflow_cross-strata	airfall_lamination,grainflow_cross-strata,inter-fingered_strata	airfall_lamination,grainflow_cross-strata
grainflow_cross-strata	airfall_lamination,grainflow_cross-strata,inter-fingered_strata	airfall_lamination,grainflow_cross-strata
grainflow_cross-strata	airfall_lamination,grainflow_cross-strata,inter-fingered_strata	airfall_lamination,grainflow_cross-strata
grainflow_cross-strata	airfall_lamination,grainflow_cross-strata,inter-fingered_strata	airfall_lamination,grainflow_cross-strata
grainflow_cross-strata	airfall_lamination,grainflow_cross-strata,inter-fingered_strata	airfall_lamination,grainflow_cross-strata
grainflow_cross-strata	airfall_lamination,grainflow_cross-strata,inter-fingered_strata	airfall_lamination,grainflow_cross-strata
inter-fingered_strata	airfall_lamination,grainflow_cross-strata,inter-fingered_strata	airfall_lamination,grainflow_cross-strata
wind_ripple_lamination	airfall_lamination,grainflow_cross-strata,inter-fingered_strata	airfall_lamination,grainflow_cross-strata
wind_ripple_lamination	airfall_lamination,grainflow_cross-strata,inter-fingered_strata	airfall_lamination,grainflow_cross-strata
wind_ripple_lamination	airfall_lamination,grainflow_cross-strata,inter-fingered_strata	airfall_lamination,grainflow_cross-strata
wind_ripple_lamination	airfall_lamination,grainflow_cross-strata,inter-fingered_strata	airfall_lamination,grainflow_cross-strata
wind_ripple_lamination	airfall_lamination,grainflow_cross-strata,inter-fingered_strata	airfall_lamination,grainflow_cross-strata
wind_ripple_lamination	airfall_lamination,grainflow_cross-strata,inter-fingered_strata	airfall_lamination,grainflow_cross-strata
wind_ripple_lamination	airfall_lamination,grainflow_cross-strata,inter-fingered_strata	airfall_lamination,grainflow_cross-strata
wind_ripple_lamination	airfall_lamination,grainflow_cross-strata,inter-fingered_strata	airfall_lamination,grainflow_cross-strata
wind_ripple_lamination	airfall_lamination,grainflow_cross-strata,inter-fingered_strata	airfall_lamination,grainflow_cross-strata
wind_ripple_lamination	airfall_lamination,grainflow_cross-strata,inter-fingered_strata	airfall_lamination,grainflow_cross-strata
wind_ripple_lamination	airfall_lamination,grainflow_cross-strata,inter-fingered_strata	airfall_lamination,grainflow_cross-strata
wind_ripple_lamination	airfall_lamination,grainflow_cross-strata,inter-fingered_strata	airfall_lamination,grainflow_cross-strata
wind_ripple_lamination	airfall_lamination,grainflow_cross-strata,inter-fingered_strata	airfall_lamination,grainflow_cross-strata
wind_ripple_lamination	airfall_lamination,grainflow_cross-strata,inter-fingered_strata	airfall_lamination,grainflow_cross-strata
wind_ripple_lamination,airfall_lamination,grainflow_cross-strata,inter-fingered_strata	airfall_lamination,grainflow_cross-strata,inter-fingered_strata	airfall_lamination,grainflow_cross-strata
wind_ripple_lamination,airfall_lamination,grainflow_cross-strata,inter-fingered_strata	airfall_lamination,grainflow_cross-strata,inter-fingered_strata	airfall_lamination,grainflow_cross-strata
wind_ripple_lamination,airfall_lamination,grainflow_cross-strata,inter-fingered_strata	airfall_lamination,grainflow_cross-strata,inter-fingered_strata	airfall_lamination,grainflow_cross-strata
wind_ripple_lamination,airfall_lamination,grainflow_cross-strata,inter-fingered_strata	airfall_lamination,grainflow_cross-strata,inter-fingered_strata	airfall_lamination,grainflow_cross-strata
wind_ripple_lamination,airfall_lamination,grainflow_cross-strata,inter-fingered_strata	airfall_lamination,grainflow_cross-strata,inter-fingered_strata	airfall_lamination,grainflow_cross-strata
wind_ripple_lamination,airfall_lamination,grainflow_cross-strata,inter-fingered_strata	channel	airfall_lamination,grainflow_cross-strata
wind_ripple_lamination,airfall_lamination,grainflow_cross-strata,inter-fingered_strata	grainflow_cross-strata	airfall_lamination,grainflow_cross-strata
wind_ripple_lamination,airfall_lamination,grainflow_cross-strata,inter-fingered_strata	grainflow_cross-strata	airfall_lamination,grainflow_cross-strata
wind_ripple_lamination,airfall_lamination,grainflow_cross-strata,inter-fingered_strata	grainflow_cross-strata	airfall_lamination,grainflow_cross-strata
wind_ripple_lamination,airfall_lamination,grainflow_cross-strata,inter-fingered_strata	grainflow_cross-strata	airfall_lamination,grainflow_cross-strata
wind_ripple_lamination,airfall_lamination,grainflow_cross-strata,inter-fingered_strata	grainflow_cross-strata	airfall_lamination,grainflow_cross-strata
wind_ripple_lamination,airfall_lamination,grainflow_cross-strata,inter-fingered_strata	grainflow_cross-strata	airfall_lamination,grainflow_cross-strata
wind_ripple_lamination,airfall_lamination,grainflow_cross-strata,inter-fingered_strata	grainflow_cross-strata	airfall_lamination,grainflow_cross-strata
wind_ripple_lamination,airfall_lamination,grainflow_cross-strata,inter-fingered_strata,translatent_strata	grainflow_cross-strata	airfall_lamination,grainflow_cross-strata
wind_ripple_lamination,airfall_lamination,grainflow_cross-strata,inter-fingered_strata,translatent_strata	grainflow_cross-strata	airfall_lamination,grainflow_cross-strata
wind_ripple_lamination,airfall_lamination,grainflow_cross-strata,inter-fingered_strata,translatent_strata	grainflow_cross-strata	airfall_lamination,grainflow_cross-strata
wind_ripple_lamination,airfall_lamination,grainflow_cross-strata,inter-fingered_strata,translatent_strata	grainflow_cross-strata	airfall_lamination,grainflow_cross-strata
wind_ripple_lamination,airfall_lamination,grainflow_cross-strata,inter-fingered_strata,translatent_strata	grainflow_cross-strata	airfall_lamination,grainflow_cross-strata
wind_ripple_lamination,airfall_lamination,grainflow_cross-strata,inter-fingered_strata,translatent_strata	grainflow_cross-strata	airfall_lamination,grainflow_cross-strata
wind_ripple_lamination,airfall_lamination,grainflow_cross-strata,inter-fingered_strata,translatent_strata	grainflow_cross-strata	airfall_lamination,grainflow_cross-strata
wind_ripple_lamination,grainflow_cross-strata	grainflow_cross-strata	airfall_lamination,grainflow_cross-strata
wind_ripple_lamination,grainflow_cross-strata	grainflow_cross-strata	airfall_lamination,grainflow_cross-strata
wind_ripple_lamination,grainflow_cross-strata	grainflow_cross-strata	airfall_lamination,grainflow_cross-strata
wind_ripple_lamination,grainflow_cross-strata	grainflow_cross-strata	airfall_lamination,grainflow_cross-strata
wind_ripple_lamination,grainflow_cross-strata	grainflow_cross-strata	wind_ripple_lamination
wind_ripple_lamination,grainflow_cross-strata	grainflow_cross-strata	wind_ripple_lamination
wind_ripple_lamination,grainflow_cross-strata	grainflow_cross-strata	wind_ripple_lamination
wind_ripple_lamination,grainflow_cross-strata	grainflow_cross-strata	wind_ripple_lamination
wind_ripple_lamination,grainflow_cross-strata	grainflow_cross-strata	wind_ripple_lamination
wind_ripple_lamination,grainflow_cross-strata	grainflow_cross-strata	wind_ripple_lamination
wind_ripple_lamination,grainflow_cross-strata	grainflow_cross-strata	wind_ripple_lamination
wind_ripple_lamination,grainflow_cross-strata	grainflow_cross-strata	wind_ripple_lamination
wind_ripple_lamination,grainflow_cross-strata	grainflow_cross-strata	wind_ripple_lamination
wind_ripple_lamination,grainflow_cross-strata,inter-fingered_strata	grainflow_cross-strata	wind_ripple_lamination
wind_ripple_lamination,grainflow_cross-strata,inter-fingered_strata	grainflow_cross-strata	wind_ripple_lamination
wind_ripple_lamination,grainflow_cross-strata,inter-fingered_strata	inter-fingered_strata	wind_ripple_lamination
wind_ripple_lamination,grainflow_cross-strata,inter-fingered_strata	inter-fingered_strata	wind_ripple_lamination
wind_ripple_lamination,grainflow_cross-strata,inter-fingered_strata	plane-bed_lamination	wind_ripple_lamination
wind_ripple_lamination,grainflow_cross-strata,inter-fingered_strata	plane-bed_lamination	wind_ripple_lamination
wind_ripple_lamination,grainflow_cross-strata,inter-fingered_strata	wind_ripple_lamination	wind_ripple_lamination
wind_ripple_lamination,grainflow_cross-strata,inter-fingered_strata	wind_ripple_lamination	wind_ripple_lamination
wind_ripple_lamination,grainflow_cross-strata,inter-fingered_strata	wind_ripple_lamination	wind_ripple_lamination
wind_ripple_lamination,grainflow_cross-strata,inter-fingered_strata	wind_ripple_lamination	wind_ripple_lamination
wind_ripple_lamination,grainflow_cross-strata,inter-fingered_strata	wind_ripple_lamination	wind_ripple_lamination
wind_ripple_lamination,grainflow_cross-strata,inter-fingered_strata	wind_ripple_lamination	wind_ripple_lamination
wind_ripple_lamination,grainflow_cross-strata,inter-fingered_strata	wind_ripple_lamination	wind_ripple_lamination
wind_ripple_lamination,grainflow_cross-strata,inter-fingered_strata	wind_ripple_lamination	wind_ripple_lamination
wind_ripple_lamination,grainflow_cross-strata,inter-fingered_strata	wind_ripple_lamination	wind_ripple_lamination,airfall_lamination,grainflow_cross-strata,inter-fingered_strata
wind_ripple_lamination,grainflow_cross-strata,inter-fingered_strata	wind_ripple_lamination	wind_ripple_lamination,airfall_lamination,grainflow_cross-strata,inter-fingered_strata
wind_ripple_lamination,grainflow_cross-strata,inter-fingered_strata	wind_ripple_lamination	wind_ripple_lamination,airfall_lamination,grainflow_cross-strata,inter-fingered_strata
wind_ripple_lamination,grainflow_cross-strata,inter-fingered_strata	wind_ripple_lamination	wind_ripple_lamination,airfall_lamination,grainflow_cross-strata,inter-fingered_strata
wind_ripple_lamination,grainflow_cross-strata,inter-fingered_strata	wind_ripple_lamination	wind_ripple_lamination,airfall_lamination,grainflow_cross-strata,inter-fingered_strata
wind_ripple_lamination,grainflow_cross-strata,inter-fingered_strata	wind_ripple_lamination	wind_ripple_lamination,airfall_lamination,grainflow_cross-strata,inter-fingered_strata
wind_ripple_lamination,grainflow_cross-strata,inter-fingered_strata	wind_ripple_lamination	wind_ripple_lamination,airfall_lamination,grainflow_cross-strata,inter-fingered_strata
wind_ripple_lamination,grainflow_cross-strata,inter-fingered_strata	wind_ripple_lamination	wind_ripple_lamination,airfall_lamination,grainflow_cross-strata,inter-fingered_strata
wind_ripple_lamination,grainflow_cross-strata,inter-fingered_strata	wind_ripple_lamination	wind_ripple_lamination,airfall_lamination,grainflow_cross-strata,inter-fingered_strata
wind_ripple_lamination,grainflow_cross-strata,inter-fingered_strata	wind_ripple_lamination	wind_ripple_lamination,airfall_lamination,grainflow_cross-strata,inter-fingered_strata
wind_ripple_lamination,grainflow_cross-strata,inter-fingered_strata	wind_ripple_lamination,airfall_lamination,grainflow_cross-strata	wind_ripple_lamination,airfall_lamination,grainflow_cross-strata,inter-fingered_strata
wind_ripple_lamination,grainflow_cross-strata,inter-fingered_strata	wind_ripple_lamination,airfall_lamination,grainflow_cross-strata	wind_ripple_lamination,airfall_lamination,grainflow_cross-strata,inter-fingered_strata
wind_ripple_lamination,grainflow_cross-strata,inter-fingered_strata	wind_ripple_lamination,airfall_lamination,grainflow_cross-strata	wind_ripple_lamination,airfall_lamination,grainflow_cross-strata,inter-fingered_strata
wind_ripple_lamination,grainflow_cross-strata,inter-fingered_strata	wind_ripple_lamination,airfall_lamination,grainflow_cross-strata	wind_ripple_lamination,airfall_lamination,grainflow_cross-strata,inter-fingered_strata
wind_ripple_lamination,grainflow_cross-strata,inter-fingered_strata	wind_ripple_lamination,airfall_lamination,grainflow_cross-strata
wind_ripple_lamination,grainflow_cross-strata,inter-fingered_strata	wind_ripple_lamination,airfall_lamination,grainflow_cross-strata
wind_ripple_lamination,grainflow_cross-strata,inter-fingered_strata	wind_ripple_lamination,airfall_lamination,grainflow_cross-strata
wind_ripple_lamination,grainflow_cross-strata,inter-fingered_strata	wind_ripple_lamination,airfall_lamination,grainflow_cross-strata
wind_ripple_lamination,grainflow_cross-strata,inter-fingered_strata	wind_ripple_lamination,airfall_lamination,grainflow_cross-strata,inter-fingered_strata
wind_ripple_lamination,grainflow_cross-strata,inter-fingered_strata	wind_ripple_lamination,airfall_lamination,grainflow_cross-strata,inter-fingered_strata
wind_ripple_lamination,grainflow_cross-strata,inter-fingered_strata	wind_ripple_lamination,airfall_lamination,grainflow_cross-strata,inter-fingered_strata
wind_ripple_lamination,grainflow_cross-strata,inter-fingered_strata	wind_ripple_lamination,airfall_lamination,grainflow_cross-strata,inter-fingered_strata
wind_ripple_lamination,grainflow_cross-strata,inter-fingered_strata	wind_ripple_lamination,airfall_lamination,grainflow_cross-strata,inter-fingered_strata
wind_ripple_lamination,grainflow_cross-strata,inter-fingered_strata	wind_ripple_lamination,airfall_lamination,grainflow_cross-strata,inter-fingered_strata
wind_ripple_lamination,grainflow_cross-strata,inter-fingered_strata	wind_ripple_lamination,airfall_lamination,grainflow_cross-strata,inter-fingered_strata
wind_ripple_lamination,grainflow_cross-strata,inter-fingered_strata	wind_ripple_lamination,airfall_lamination,grainflow_cross-strata,inter-fingered_strata
wind_ripple_lamination,grainflow_cross-strata,inter-fingered_strata	wind_ripple_lamination,airfall_lamination,grainflow_cross-strata,inter-fingered_strata
wind_ripple_lamination,grainflow_cross-strata,inter-fingered_strata	wind_ripple_lamination,airfall_lamination,grainflow_cross-strata,inter-fingered_strata
wind_ripple_lamination,grainflow_cross-strata,inter-fingered_strata	wind_ripple_lamination,airfall_lamination,grainflow_cross-strata,inter-fingered_strata
wind_ripple_lamination,grainflow_cross-strata,inter-fingered_strata	wind_ripple_lamination,airfall_lamination,grainflow_cross-strata,inter-fingered_strata
wind_ripple_lamination,grainflow_cross-strata,inter-fingered_strata	wind_ripple_lamination,airfall_lamination,grainflow_cross-strata,inter-fingered_strata
wind_ripple_lamination,grainflow_cross-strata,inter-fingered_strata	wind_ripple_lamination,airfall_lamination,grainflow_cross-strata,inter-fingered_strata
wind_ripple_lamination,grainflow_cross-strata,inter-fingered_strata	wind_ripple_lamination,airfall_lamination,grainflow_cross-strata,inter-fingered_strata
wind_ripple_lamination,grainflow_cross-strata,inter-fingered_strata	wind_ripple_lamination,airfall_lamination,grainflow_cross-strata,inter-fingered_strata
wind_ripple_lamination,grainflow_cross-strata,inter-fingered_strata	wind_ripple_lamination,airfall_lamination,grainflow_cross-strata,inter-fingered_strata
wind_ripple_lamination,grainflow_cross-strata,inter-fingered_strata	wind_ripple_lamination,airfall_lamination,grainflow_cross-strata,inter-fingered_strata
wind_ripple_lamination,grainflow_cross-strata,inter-fingered_strata	wind_ripple_lamination,airfall_lamination,grainflow_cross-strata,inter-fingered_strata
wind_ripple_lamination,grainflow_cross-strata,inter-fingered_strata	wind_ripple_lamination,airfall_lamination,grainflow_cross-strata,inter-fingered_strata
wind_ripple_lamination,grainflow_cross-strata,inter-fingered_strata	wind_ripple_lamination,airfall_lamination,grainflow_cross-strata,inter-fingered_strata
wind_ripple_lamination,grainflow_cross-strata,inter-fingered_strata	wind_ripple_lamination,airfall_lamination,grainflow_cross-strata,inter-fingered_strata
wind_ripple_lamination,grainflow_cross-strata,inter-fingered_strata	wind_ripple_lamination,airfall_lamination,grainflow_cross-strata,inter-fingered_strata
wind_ripple_lamination,grainflow_cross-strata,inter-fingered_strata	wind_ripple_lamination,airfall_lamination,grainflow_cross-strata,inter-fingered_strata
wind_ripple_lamination,grainflow_cross-strata,inter-fingered_strata	wind_ripple_lamination,airfall_lamination,grainflow_cross-strata,inter-fingered_strata
wind_ripple_lamination,grainflow_cross-strata,inter-fingered_strata	wind_ripple_lamination,airfall_lamination,grainflow_cross-strata,inter-fingered_strata
wind_ripple_lamination,grainflow_cross-strata,inter-fingered_strata	wind_ripple_lamination,airfall_lamination,grainflow_cross-strata,inter-fingered_strata
wind_ripple_lamination,grainflow_cross-strata,inter-fingered_strata	wind_ripple_lamination,airfall_lamination,grainflow_cross-strata,inter-fingered_strata
wind_ripple_lamination,grainflow_cross-strata,inter-fingered_strata	wind_ripple_lamination,airfall_lamination,grainflow_cross-strata,inter-fingered_strata
wind_ripple_lamination,grainflow_cross-strata,inter-fingered_strata	wind_ripple_lamination,airfall_lamination,grainflow_cross-strata,inter-fingered_strata
wind_ripple_lamination,grainflow_cross-strata,inter-fingered_strata	wind_ripple_lamination,airfall_lamination,grainflow_cross-strata,inter-fingered_strata
wind_ripple_lamination,grainflow_cross-strata,inter-fingered_strata	wind_ripple_lamination,airfall_lamination,grainflow_cross-strata,inter-fingered_strata
wind_ripple_lamination,grainflow_cross-strata,inter-fingered_strata	wind_ripple_lamination,airfall_lamination,grainflow_cross-strata,inter-fingered_strata
wind_ripple_lamination,grainflow_cross-strata,inter-fingered_strata	wind_ripple_lamination,airfall_lamination,grainflow_cross-strata,inter-fingered_strata
wind_ripple_lamination,grainflow_cross-strata,inter-fingered_strata	wind_ripple_lamination,airfall_lamination,grainflow_cross-strata,inter-fingered_strata
wind_ripple_lamination,grainflow_cross-strata,inter-fingered_strata	wind_ripple_lamination,airfall_lamination,grainflow_cross-strata,inter-fingered_strata
wind_ripple_lamination,grainflow_cross-strata,inter-fingered_strata	wind_ripple_lamination,airfall_lamination,grainflow_cross-strata,inter-fingered_strata
wind_ripple_lamination,grainflow_cross-strata,inter-fingered_strata	wind_ripple_lamination,airfall_lamination,grainflow_cross-strata,inter-fingered_strata
wind_ripple_lamination,grainflow_cross-strata,inter-fingered_strata	wind_ripple_lamination,airfall_lamination,grainflow_cross-strata,inter-fingered_strata
wind_ripple_lamination,grainflow_cross-strata,inter-fingered_strata	wind_ripple_lamination,airfall_lamination,grainflow_cross-strata,inter-fingered_strata
wind_ripple_lamination,grainflow_cross-strata,inter-fingered_strata	wind_ripple_lamination,airfall_lamination,grainflow_cross-strata,inter-fingered_strata
wind_ripple_lamination,grainflow_cross-strata,inter-fingered_strata	wind_ripple_lamination,airfall_lamination,grainflow_cross-strata,inter-fingered_strata
wind_ripple_lamination,grainflow_cross-strata,inter-fingered_strata	wind_ripple_lamination,airfall_lamination,grainflow_cross-strata,inter-fingered_strata
wind_ripple_lamination,grainflow_cross-strata,inter-fingered_strata	wind_ripple_lamination,airfall_lamination,grainflow_cross-strata,inter-fingered_strata
wind_ripple_lamination,grainflow_cross-strata,inter-fingered_strata	wind_ripple_lamination,airfall_lamination,grainflow_cross-strata,inter-fingered_strata
wind_ripple_lamination,grainflow_cross-strata,inter-fingered_strata	wind_ripple_lamination,airfall_lamination,grainflow_cross-strata,inter-fingered_strata
wind_ripple_lamination,inter-fingered_strata	wind_ripple_lamination,airfall_lamination,grainflow_cross-strata,inter-fingered_strata
wind_ripple_lamination,translatent_strata	wind_ripple_lamination,airfall_lamination,grainflow_cross-strata,inter-fingered_strata
wind_ripple_lamination,translatent_strata	wind_ripple_lamination,airfall_lamination,grainflow_cross-strata,inter-fingered_strata
	wind_ripple_lamination,airfall_lamination,grainflow_cross-strata,inter-fingered_strata
	wind_ripple_lamination,airfall_lamination,grainflow_cross-strata,inter-fingered_strata
	wind_ripple_lamination,airfall_lamination,grainflow_cross-strata,inter-fingered_strata
	wind_ripple_lamination,airfall_lamination,grainflow_cross-strata,inter-fingered_strata
	wind_ripple_lamination,airfall_lamination,grainflow_cross-strata,inter-fingered_strata
	wind_ripple_lamination,airfall_lamination,grainflow_cross-strata,inter-fingered_strata
	wind_ripple_lamination,airfall_lamination,grainflow_cross-strata,inter-fingered_strata
	wind_ripple_lamination,airfall_lamination,grainflow_cross-strata,inter-fingered_strata
	wind_ripple_lamination,airfall_lamination,grainflow_cross-strata,inter-fingered_strata
	wind_ripple_lamination,airfall_lamination,grainflow_cross-strata,inter-fingered_strata
	wind_ripple_lamination,airfall_lamination,grainflow_cross-strata,inter-fingered_strata
	wind_ripple_lamination,airfall_lamination,grainflow_cross-strata,inter-fingered_strata
	wind_ripple_lamination,airfall_lamination,grainflow_cross-strata,inter-fingered_strata
	wind_ripple_lamination,airfall_lamination,grainflow_cross-strata,inter-fingered_strata
	wind_ripple_lamination,airfall_lamination,grainflow_cross-strata,inter-fingered_strata
	wind_ripple_lamination,airfall_lamination,grainflow_cross-strata,inter-fingered_strata
	wind_ripple_lamination,airfall_lamination,grainflow_cross-strata,inter-fingered_strata
	wind_ripple_lamination,airfall_lamination,grainflow_cross-strata,inter-fingered_strata
	wind_ripple_lamination,airfall_lamination,grainflow_cross-strata,inter-fingered_strata
	wind_ripple_lamination,airfall_lamination,grainflow_cross-strata,inter-fingered_strata
	wind_ripple_lamination,airfall_lamination,grainflow_cross-strata,inter-fingered_strata
	wind_ripple_lamination,airfall_lamination,grainflow_cross-strata,inter-fingered_strata
	wind_ripple_lamination,airfall_lamination,grainflow_cross-strata,inter-fingered_strata
	wind_ripple_lamination,airfall_lamination,grainflow_cross-strata,inter-fingered_strata
	wind_ripple_lamination,airfall_lamination,grainflow_cross-strata,inter-fingered_strata
	wind_ripple_lamination,airfall_lamination,grainflow_cross-strata,inter-fingered_strata
	wind_ripple_lamination,airfall_lamination,grainflow_cross-strata,inter-fingered_strata,translatent_strata
	wind_ripple_lamination,airfall_lamination,grainflow_cross-strata,inter-fingered_strata,translatent_strata
	wind_ripple_lamination,airfall_lamination,grainflow_cross-strata,inter-fingered_strata,translatent_strata
	wind_ripple_lamination,airfall_lamination,grainflow_cross-strata,inter-fingered_strata,translatent_strata
	wind_ripple_lamination,airfall_lamination,grainflow_cross-strata,inter-fingered_strata,translatent_strata
	wind_ripple_lamination,airfall_lamination,grainflow_cross-strata,inter-fingered_strata,translatent_strata
	wind_ripple_lamination,airfall_lamination,grainflow_cross-strata,inter-fingered_strata,translatent_strata
	wind_ripple_lamination,airfall_lamination,grainflow_cross-strata,inter-fingered_strata,translatent_strata
	wind_ripple_lamination,airfall_lamination,grainflow_cross-strata,inter-fingered_strata,translatent_strata
	wind_ripple_lamination,airfall_lamination,grainflow_cross-strata,inter-fingered_strata,translatent_strata
	wind_ripple_lamination,airfall_lamination,grainflow_cross-strata,inter-fingered_strata,translatent_strata
	wind_ripple_lamination,airfall_lamination,grainflow_cross-strata,inter-fingered_strata,translatent_strata
	wind_ripple_lamination,airfall_lamination,grainflow_cross-strata,inter-fingered_strata,translatent_strata
	wind_ripple_lamination,airfall_lamination,grainflow_cross-strata,inter-fingered_strata,translatent_strata
	wind_ripple_lamination,airfall_lamination,grainflow_cross-strata,inter-fingered_strata,translatent_strata
	wind_ripple_lamination,airfall_lamination,grainflow_cross-strata,inter-fingered_strata,translatent_strata
	wind_ripple_lamination,airfall_lamination,grainflow_cross-strata,translatent_strata
	wind_ripple_lamination,airfall_lamination,grainflow_cross-strata,translatent_strata
	wind_ripple_lamination,airfall_lamination,grainflow_cross-strata,translatent_strata
	wind_ripple_lamination,airfall_lamination,grainflow_cross-strata,translatent_strata
	wind_ripple_lamination,airfall_lamination,grainflow_cross-strata,translatent_strata
	wind_ripple_lamination,grainflow_cross-strata
	wind_ripple_lamination,grainflow_cross-strata,adhesion_ripples,translatent_strata
	wind_ripple_lamination,grainflow_cross-strata,inter-fingered_strata
	wind_ripple_lamination,grainflow_cross-strata,inter-fingered_strata
	wind_ripple_lamination,grainflow_cross-strata,inter-fingered_strata
	wind_ripple_lamination,grainflow_cross-strata,inter-fingered_strata
	wind_ripple_lamination,grainflow_cross-strata,inter-fingered_strata
	wind_ripple_lamination,grainflow_cross-strata,inter-fingered_strata
	wind_ripple_lamination,grainflow_cross-strata,inter-fingered_strata
	wind_ripple_lamination,grainflow_cross-strata,inter-fingered_strata
	wind_ripple_lamination,grainflow_cross-strata,inter-fingered_strata
	wind_ripple_lamination,grainflow_cross-strata,inter-fingered_strata
	wind_ripple_lamination,grainflow_cross-strata,inter-fingered_strata
	wind_ripple_lamination,grainflow_cross-strata,inter-fingered_strata
	wind_ripple_lamination,grainflow_cross-strata,inter-fingered_strata
	wind_ripple_lamination,grainflow_cross-strata,inter-fingered_strata
	wind_ripple_lamination,grainflow_cross-strata,inter-fingered_strata
	wind_ripple_lamination,grainflow_cross-strata,inter-fingered_strata
	wind_ripple_lamination,grainflow_cross-strata,inter-fingered_strata
	wind_ripple_lamination,grainflow_cross-strata,inter-fingered_strata
	wind_ripple_lamination,grainflow_cross-strata,inter-fingered_strata
	wind_ripple_lamination,grainflow_cross-strata,inter-fingered_strata
	wind_ripple_lamination,grainflow_cross-strata,inter-fingered_strata
	wind_ripple_lamination,grainflow_cross-strata,inter-fingered_strata
	wind_ripple_lamination,grainflow_cross-strata,inter-fingered_strata
	wind_ripple_lamination,grainflow_cross-strata,inter-fingered_strata
	wind_ripple_lamination,grainflow_cross-strata,inter-fingered_strata
	wind_ripple_lamination,grainflow_cross-strata,inter-fingered_strata
	wind_ripple_lamination,grainflow_cross-strata,inter-fingered_strata
	wind_ripple_lamination,grainflow_cross-strata,inter-fingered_strata
	wind_ripple_lamination,grainflow_cross-strata,inter-fingered_strata
	wind_ripple_lamination,grainflow_cross-strata,inter-fingered_strata
	wind_ripple_lamination,grainflow_cross-strata,inter-fingered_strata
	wind_ripple_lamination,grainflow_cross-strata,inter-fingered_strata
	wind_ripple_lamination,grainflow_cross-strata,inter-fingered_strata
	wind_ripple_lamination,grainflow_cross-strata,inter-fingered_strata
	wind_ripple_lamination,grainflow_cross-strata,inter-fingered_strata
	wind_ripple_lamination,grainflow_cross-strata,inter-fingered_strata
	wind_ripple_lamination,grainflow_cross-strata,inter-fingered_strata
	wind_ripple_lamination,grainflow_cross-strata,inter-fingered_strata
	wind_ripple_lamination,grainflow_cross-strata,inter-fingered_strata
	wind_ripple_lamination,grainflow_cross-strata,inter-fingered_strata
	wind_ripple_lamination,grainflow_cross-strata,inter-fingered_strata
	wind_ripple_lamination,grainflow_cross-strata,inter-fingered_strata
	wind_ripple_lamination,grainflow_cross-strata,inter-fingered_strata
	wind_ripple_lamination,grainflow_cross-strata,inter-fingered_strata
	wind_ripple_lamination,grainflow_cross-strata,inter-fingered_strata
	wind_ripple_lamination,grainflow_cross-strata,inter-fingered_strata
	wind_ripple_lamination,grainflow_cross-strata,inter-fingered_strata
	wind_ripple_lamination,grainflow_cross-strata,inter-fingered_strata
	wind_ripple_lamination,grainflow_cross-strata,inter-fingered_strata
	wind_ripple_lamination,grainflow_cross-strata,inter-fingered_strata
	wind_ripple_lamination,grainflow_cross-strata,inter-fingered_strata
	wind_ripple_lamination,grainflow_cross-strata,inter-fingered_strata
	wind_ripple_lamination,grainflow_cross-strata,inter-fingered_strata
	wind_ripple_lamination,grainflow_cross-strata,inter-fingered_strata
	wind_ripple_lamination,grainflow_cross-strata,inter-fingered_strata
	wind_ripple_lamination,grainflow_cross-strata,inter-fingered_strata
	wind_ripple_lamination,grainflow_cross-strata,inter-fingered_strata
	wind_ripple_lamination,grainflow_cross-strata,inter-fingered_strata
	wind_ripple_lamination,grainflow_cross-strata,inter-fingered_strata
	wind_ripple_lamination,grainflow_cross-strata,inter-fingered_strata
	wind_ripple_lamination,grainflow_cross-strata,inter-fingered_strata
	wind_ripple_lamination,grainflow_cross-strata,inter-fingered_strata
	wind_ripple_lamination,grainflow_cross-strata,inter-fingered_strata
	wind_ripple_lamination,grainflow_cross-strata,inter-fingered_strata
	wind_ripple_lamination,grainflow_cross-strata,inter-fingered_strata
	wind_ripple_lamination,grainflow_cross-strata,inter-fingered_strata
	wind_ripple_lamination,grainflow_cross-strata,inter-fingered_strata
	wind_ripple_lamination,grainflow_cross-strata,inter-fingered_strata
	wind_ripple_lamination,grainflow_cross-strata,inter-fingered_strata
	wind_ripple_lamination,grainflow_cross-strata,inter-fingered_strata
	wind_ripple_lamination,grainflow_cross-strata,inter-fingered_strata
	wind_ripple_lamination,grainflow_cross-strata,inter-fingered_strata
	wind_ripple_lamination,grainflow_cross-strata,inter-fingered_strata
	wind_ripple_lamination,grainflow_cross-strata,inter-fingered_strata
	wind_ripple_lamination,grainflow_cross-strata,inter-fingered_strata
	wind_ripple_lamination,grainflow_cross-strata,inter-fingered_strata
	wind_ripple_lamination,grainflow_cross-strata,inter-fingered_strata
	wind_ripple_lamination,grainflow_cross-strata,inter-fingered_strata
	wind_ripple_lamination,grainflow_cross-strata,inter-fingered_strata
	wind_ripple_lamination,grainflow_cross-strata,inter-fingered_strata
	wind_ripple_lamination,grainflow_cross-strata,inter-fingered_strata
	wind_ripple_lamination,grainflow_cross-strata,inter-fingered_strata
	wind_ripple_lamination,grainflow_cross-strata,inter-fingered_strata
	wind_ripple_lamination,grainflow_cross-strata,inter-fingered_strata
	wind_ripple_lamination,grainflow_cross-strata,translatent_strata
	wind_ripple_lamination,grainflow_cross-strata,translatent_strata
	wind_ripple_lamination,translatent_strata
	wind_ripple_lamination,translatent_strata
	wind_ripple_lamination,translatent_strata
	wind_ripple_lamination,translatent_strata
	wind_ripple_lamination,translatent_strata
	wind_ripple_lamination,translatent_strata

## Sheet: Figure 11
INTERDUNE LENGTH														GROUP 1					GROUP2				GROUP 3
GROUP 1	GROUP 2	GROUP 3		Anova: Single Factor										DUNE					DUNE				DUNE
0.75	3.8	30												Reference	Angle of Climb	Wavelength			Reference	Angle of Climb	Wavelength		Reference	Angle of Climb	Wavelength
3.5	4	40		SUMMARY										Scherer, C.M.S. and Lavina, E.L.C. (2005) Sedimentary cycles and facies architecture of aeolian-fluvial strata of the Upper Jurassic Guara Formation, southern Brazil. Sedimentology, 52, 1323-1341.	2-5? NOT INCLUDED				Mountney, N.P. and Jagger, A. (2004) Stratigraphic evolution of an aeolian erg margin system: the Permian Cedar Mesa Sandstone, SE Utah, USA. Sedimentology, 51, 713-743.	0.5	340		Mountney, N.P. and Howell, J. (2000) Aeolian architecture, bedform climbing and preservation space in the Cretaceous Etjo Formation, NW Nambia. Sedimentology, 47, 825-849.	4.25	700
5	5	45		Groups	Count	Sum	Average	Variance						Clemmenesen, L.B. (1988) Aeolian morphology preserved by lava cover, the Precambrain Mussartut Member, Eriksfjord Formation, South Greenland. Bull. Geol. Soc. Denmark, 37, 105-116.	NO	200			Mountney, N.P. and Jagger, A. (2004) Stratigraphic evolution of an aeolian erg margin system: the Permian Cedar Mesa Sandstone, SE Utah, USA. Sedimentology, 51, 713-743.	0.75	190		Mountney, N.P. and Howell, J. (2000) Aeolian architecture, bedform climbing and preservation space in the Cretaceous Etjo Formation, NW Nambia. Sedimentology, 47, 825-849.	2.98	1000
8	5	45		GROUP 1	23	1489.75	64.7717	26646.3						Clemmenesen, L.B. (1988) Aeolian morphology preserved by lava cover, the Precambrain Mussartut Member, Eriksfjord Formation, South Greenland. Bull. Geol. Soc. Denmark, 37, 105-116.	0.1 (MEASURED; Fig. 9)	150 (MEASURED; Fig. 9)			Mountney, N.P. and Jagger, A. (2004) Stratigraphic evolution of an aeolian erg margin system: the Permian Cedar Mesa Sandstone, SE Utah, USA. Sedimentology, 51, 713-743.	0.65	175		Mountney, N.P. and Howell, J. (2000) Aeolian architecture, bedform climbing and preservation space in the Cretaceous Etjo Formation, NW Nambia. Sedimentology, 47, 825-849.	2.58	600
9	5	45		GROUP 2	152	24063.3	158.311	122825						Mountney and Wakefield (2013)		70 (MEASURED; Fig. 6)			Mountney, N.P. and Jagger, A. (2004) Stratigraphic evolution of an aeolian erg margin system: the Permian Cedar Mesa Sandstone, SE Utah, USA. Sedimentology, 51, 713-743.	0.4	140		Mountney, N.P. and Howell, J. (2000) Aeolian architecture, bedform climbing and preservation space in the Cretaceous Etjo Formation, NW Nambia. Sedimentology, 47, 825-849.	2.58	1000
9	5	45		GROUP 3	82	20971	255.744	40606.9						Pulvertaft (1985)	0.67(MEASURED; Fig. 3))	NO			Clemmensen, L.B. (1987) Complex star dunes and associated aeolian bedforms, Hopeman Sandstone (Permo-Triassic), Moray Firth Basin, Scotland. In: Desert Sediments: Ancient and Modern (Eds L.E. Frostick and I. Reid), Geol. Soc. London Spec. Publ., 35, 213-231.	NO	950		Mountney, N.P. and Howell, J. (2000) Aeolian architecture, bedform climbing and preservation space in the Cretaceous Etjo Formation, NW Nambia. Sedimentology, 47, 825-849.	1.12	720
9	10	45																	Scherer, M.S., Lavina, E.L.C., Dias Filho, D.C., Oliveira, F.M., Bongiolo, D.E., Aguiar, E.S. (2007) Stratigraphy and facies architecture of the fluvial-aeolian-lacustrine Sergi Formation (Upper Jurassic), Reconcavo Basin, Brazil. Sed. Geol., 194, 169-193.	NO	50-100		Mountney, N.P. and Howell, J. (2000) Aeolian architecture, bedform climbing and preservation space in the Cretaceous Etjo Formation, NW Nambia. Sedimentology, 47, 825-849.	0.95	600
9	10	48																	Kocurek, G. and Day, M. (2018) What is preserved in the aeolian rock record? A Jurassic Entrada Sandstone case study at the Utah-Arizona border. Sedimentology. 65, 1301-1321.	2	94		Mountney, N.P. and Howell, J. (2000) Aeolian architecture, bedform climbing and preservation space in the Cretaceous Etjo Formation, NW Nambia. Sedimentology, 47, 825-849.	0.82	700
9	12	50		ANOVA															Kocurek, G. and Day, M. (2018) What is preserved in the aeolian rock record? A Jurassic Entrada Sandstone case study at the Utah-Arizona border. Sedimentology. 65, 1301-1321.	0.9	121		Mountney, N.P. and Howell, J. (2000) Aeolian architecture, bedform climbing and preservation space in the Cretaceous Etjo Formation, NW Nambia. Sedimentology, 47, 825-849.	0.65	700
9	12	55		Source of Variation	SS	df	MS	F	P-value	F crit									Benan, C.A.A. and Kocurek, G. (2000) Catastrophic flooding of an aeolian dune field: Jurassic Entrada and Todilto Formations, Ghost Ranch, New Mexico, USA. Sedimentology, 47, 1069-1080.	0.1-0.4	1000		Mountney, N.P. and Howell, J. (2000) Aeolian architecture, bedform climbing and preservation space in the Cretaceous Etjo Formation, NW Nambia. Sedimentology, 47, 825-849.	0.46	1000
9	12.5	55		Between Groups	847059	2	423530	4.79782	0.0090101	3.03134									Crabaugh, M. and Kocurek, G. (1993) Entrada Sandstone: an example of a wet aeolian system. In: The Dynamics and Environmental Context of Aeolian Sedimentary Systems (Ed K. Pye), Geol. Soc. Spec. Pub. 72, 105-126.	0.16	900		Scherer, M.S., Lavina, E.L.C., Dias Filho, D.C., Oliveira, F.M., Bongiolo, D.E., Aguiar, E.S. (2007) Stratigraphy and facies architecture of the fluvial-aeolian-lacustrine Sergi Formation (Upper Jurassic), Reconcavo Basin, Brazil. Sed. Geol., 194, 169-193.	1.4 (MEASURED; FIG 5B)	NO
10	15	60		Within Groups	2.2422e+07	254	88275.5												Crabaugh, M. and Kocurek, G. (1993) Entrada Sandstone: an example of a wet aeolian system. In: The Dynamics and Environmental Context of Aeolian Sedimentary Systems (Ed K. Pye), Geol. Soc. Spec. Pub. 72, 105-126.	0.3	900		Scherer, M.S., Lavina, E.L.C., Dias Filho, D.C., Oliveira, F.M., Bongiolo, D.E., Aguiar, E.S. (2007) Stratigraphy and facies architecture of the fluvial-aeolian-lacustrine Sergi Formation (Upper Jurassic), Reconcavo Basin, Brazil. Sed. Geol., 194, 169-193.	0.95(MEASURED; FIG 5B)	NO
10	16	60																	Crabaugh, M. and Kocurek, G. (1993) Entrada Sandstone: an example of a wet aeolian system. In: The Dynamics and Environmental Context of Aeolian Sedimentary Systems (Ed K. Pye), Geol. Soc. Spec. Pub. 72, 105-126.	0.6	900
10.5	18	60		Total	2.3269e+07	256													Crabaugh, M. and Kocurek, G. (1993) Entrada Sandstone: an example of a wet aeolian system. In: The Dynamics and Environmental Context of Aeolian Sedimentary Systems (Ed K. Pye), Geol. Soc. Spec. Pub. 72, 105-126.	0.7	900
12	18	60																	Crabaugh, M. and Kocurek, G. (1993) Entrada Sandstone: an example of a wet aeolian system. In: The Dynamics and Environmental Context of Aeolian Sedimentary Systems (Ed K. Pye), Geol. Soc. Spec. Pub. 72, 105-126.	0.1	900
17	18	70			MEDIAN	ST.DEV													Crabaugh, M. and Kocurek, G. (1993) Entrada Sandstone: an example of a wet aeolian system. In: The Dynamics and Environmental Context of Aeolian Sedimentary Systems (Ed K. Pye), Geol. Soc. Spec. Pub. 72, 105-126.	0.1	900
30	18	75		GROUP 1	10	163.237													Crabaugh, M. and Kocurek, G. (1993) Entrada Sandstone: an example of a wet aeolian system. In: The Dynamics and Environmental Context of Aeolian Sedimentary Systems (Ed K. Pye), Geol. Soc. Spec. Pub. 72, 105-126.	0.1	900
30	18	78		GROUP 2	55	350.464													Loope, D.B. and Rowe C.M. (2003) Long-lived pluvial episodes during deposition of the Navajo Sandstone. J. Geol., 111, 223-232.	NO	1000
30	20	85		GROUP 3	200	201.511													Stromback, A., Howell, J.A. and Veiga, G.D. (2005) The transgression of an erg- sedimentation and reworking/soft-sediment deformation of aeolian facies: the Cretaceous Troncoso Member, Neuquen Basin, Argentina. In: The Neuquen Basin, Argentina: A Case Study in Sequence Stratigraphy and Basin Dynamics (Eds G.D. Viega, G.D. Spaletti, J.A. Howell and E. Schwartz). Geol. Soc. Spec. Publ., 252, 163-18…	NO	2000
30	20	85																	Clemmensen, L.B. and Abrahamsen, K. (1983) Aeolian stratification and facies association in desert sediments, Arran basin (Permian), Scotland. Sedimentology, 30, 311-339.	NO	5-10L
70	20	90																	Mountney, N.P. (2006) Periodic accumulation and destruction of aeolian erg sequences: The Cedar Mesa Sandstone, White Canyon, southern Utah. Sedimentology, 53, 789-823.	NO	300-400
580	21	90																	Paim, P.S.G. and Scherer, C.M.S. (2007) High-resolution stratigraphy and depositional model of wind- and water-laid deposits in the Ordovician Guaritas Rift (southernmost Brazil). Sed. Geol., 202, 776-795.	NO	50-100
580	21	90
	23	90												Anova: Single Factor	ANGLE OF CLIMB
	24	95
	24	95												SUMMARY
	28	100												Groups	Count	Sum	Average	Variance
	29	100												GROUP 1	2	0.77	0.385	0.16245
	30	105												GROUP 2	14	7.51	0.536429	0.248809
	30	115												GROUP 3	11	18.74	1.70364	1.46555
	30	115
	30	115
	30	120												ANOVA
	30	130												Source of Variation	SS	df	MS	F	P-value	F crit
	30	140												Between Groups	9.21116	2	4.60558	6.12294	0.00710283	3.40283
	30	140												Within Groups	18.0524	24	0.752184
	30	150
	30	160												Total	27.2636	26
	30	170
	30	185												Anova: Single Factor
	30	200
	31	200												SUMMARY
	32	240												Groups	Count	Sum	Average	Variance
	40	245												GROUP 1	3	420	140	4300
	40	245												GROUP 2	21	12817.5	610.357	255423
	40	245												GROUP 3	9	7020	780	29100
	40	260
	40	265
	40	270												ANOVA
	40	270												Source of Variation	SS	df	MS	F	P-value	F crit
	40	280												Between Groups	922310	2	461155	2.58599	0.092017	3.31583
	40	280												Within Groups	5.34986e+06	30	178329
	40	300
	40	300												Total	6.27217e+06	32
	40	300
	40	310												ANGLE OF CLIMB				WAVELENGTH					GROUP1	GROUP2	GROUP3
	40	310												GROUP 1	GROUP 2	GROUP 3		GROUP 1	GROUP 2	GROUP 3		CLIMB
	40	315												0.1	0.5	4.25		200	340	700		MEDIAN	0.385	0.45	1.12
	42	320												0.67	0.75	2.98		150	190	1000		SD	0.403051	0.498808	1.2106
	42	330													0.65	2.58		70	175	600
	42	330													0.4	2.58			140	1000		WAVLENGTH
	45	350													2	1.12			950	720		MEDIAN	150	900	700
	45	410													0.9	0.95			75	600		SD	65.5744	505.394	170.587
	45	410													0.25	0.82			94	700
	45	490													0.16	0.65			121	700
	45	500													0.3	0.46			1000	1000
	45	500													0.6	1.4			900
	45	500													0.7	0.95			900
	45	500													0.1				900
	50	500													0.1				900
	50	525													0.1				900
	50	550																	900
	50	550																	900
	55	550																	1000
	55	600																	2000
	55	600																	7.5
	55	660																	350
	55	670																	75
	55	690
	55	690
	60	690
	60	690
	60
	60
	60
	60
	67
	67
	80
	80
	80
	80
	80
	80
	80
	80
	80
	80
	80
	80
	90
	90
	90
	100
	100
	100
	100
	100
	100
	100
	100
	100
	100
	100
	100
	100
	100
	100
	100
	110
	110
	110
	120
	120
	120
	120
	130
	160
	160
	160
	160
	160
	160
	170
	200
	200
	200
	200
	220
	260
	270
	560
	950
	950
	950
	950
	1600
	1600
	1600
	1800
	1800
	1800

## Sheet: Figure 12
GROUP 1									GROUP 2							GROUP 3
Lower Cutler Beds	deflation	stabilized	wet	\N		supersurface wetness			Sergi Formation	change in depositional environment	\N	\N	supersurface wetness			Etjo Formation	deflation	stabilized	damp	dessication_cracks,armoured_lag				supersurface wetness
Lower Cutler Beds	deflation	stabilized	wet	\N		damp	3		Sergi Formation	change in depositional environment	unstabilized	\N	damp	14		Etjo Formation	deflation	stabilized	damp	dessication_cracks,armoured_lag				damp	6
Lower Cutler Beds	deflation	stabilized	wet	\N		dry	3		Sergi Formation	change in depositional environment	unstabilized	\N	dry	16		Etjo Formation	deflation	stabilized	damp	armoured_lag				dry	2
Lower Cutler Beds	deflation	stabilized	wet	\N		wet	66		Sergi Formation	change in depositional environment	unstabilized	\N	wet	98		Etjo Formation	deflation	stabilized	damp	dessication_cracks,polygonal_features,bioturbation,armoured_lag				wet	9
Lower Cutler Beds	deflation	stabilized	wet	\N					Sergi Formation	change in depositional environment	unstabilized	\N				Etjo Formation	deflation	stabilized	damp	dessication_cracks,polygonal_features,bioturbation,armoured_lag
Lower Cutler Beds	deflation	stabilized	wet	\N		supersurface type			Sergi Formation	change in depositional environment	unstabilized	\N	supersurface type			Etjo Formation	deflation	stabilized	damp	dessication_cracks,polygonal_features,bioturbation,armoured_lag				supersurface type
Lower Cutler Beds	deflation	stabilized	wet	\N		depositional	28		Sergi Formation	change in depositional environment	unstabilized	\N	depositional	37		Copper Harbor Formation	change in environment	stabilized	dry	armoured_lag				deflationary	6
Lower Cutler Beds	deflation	stabilized	wet	\N		bypass	6		Sergi Formation	change in depositional environment	unstabilized	\N	bypass	34		Copper Harbor Formation	change in environment	unstabilized	dry	\N				overlain by fluvial/marine/sabkha	11
Lower Cutler Beds	deflation	stabilized	wet	\N		deflation	38		Sergi Formation	change in depositional environment	unstabilized	\N	deflation	58		Copper Harbor Formation	change in environment	unstabilized	wet	\N				bypass	0
Lower Cutler Beds	deflation	stabilized	wet	\N					Sergi Formation	change in depositional environment	unstabilized	\N				Copper Harbor Formation	change in environment	unstabilized	wet	\N
Lower Cutler Beds	deflation	stabilized	wet	rhizoliths/rootlets		stabilization			Sergi Formation	change in depositional environment	unstabilized	\N	stabilization			Copper Harbor Formation	change in environment	unstabilized	wet	\N				stabilization
Lower Cutler Beds	deflation	stabilized	wet	\N		unstabilized	55		Sergi Formation	change in depositional environment	unstabilized	\N	stabilized	15		Copper Harbor Formation	change in environment	unstabilized	wet	\N				stabilized	7
Lower Cutler Beds	deflation	stabilized	wet	rhizoliths/rootlets		stabilized	17		Sergi Formation	change in depositional environment	unstabilized	\N	unstabilized	114		Copper Harbor Formation	change in environment	unstabilized	wet	\N				unstabilized	10
Lower Cutler Beds	deflation	stabilized	wet	rhizoliths/rootlets			216		Sergi Formation	change in depositional environment	unstabilized	\N		386		Copper Harbor Formation	change in environment	unstabilized	wet	\N					51
Lower Cutler Beds	deflation	stabilized	wet	rhizoliths/rootlets					Sergi Formation	change in depositional environment	unstabilized	\N				Copper Harbor Formation	change in environment	unstabilized	wet	\N
Lower Cutler Beds	deflation	stabilized	wet	rhizoliths/rootlets					Sergi Formation	change in depositional environment	unstabilized	\N				Copper Harbor Formation	change in environment	unstabilized	wet	\N
Lower Cutler Beds	deflation	stabilized	wet	rhizoliths/rootlets					Sergi Formation	change in depositional environment	unstabilized	\N				Copper Harbor Formation	change in environment	unstabilized	wet	\N
Arikaree Group	change in depositional environment	unstabilized	wet	\N					Sergi Formation	change in depositional environment	unstabilized	\N
Arikaree Group	change in depositional environment	unstabilized	wet	\N					Agrio Formation	change in depositional environment	unstabilized	\N
Arikaree Group	change in depositional environment	unstabilized	wet	\N					Agrio Formation	change in depositional environment	unstabilized	\N
Arikaree Group	change in depositional environment	unstabilized	wet	\N					Agrio Formation	change in depositional environment	unstabilized	\N
Arikaree Group	change in depositional environment	unstabilized	wet	\N					Agrio Formation	change in depositional environment	unstabilized	\N
Lower Cutler Beds	change in depositional environment	unstabilized	wet	\N					Agrio Formation	change in depositional environment	unstabilized	\N
Lower Cutler Beds	change in depositional environment	unstabilized	wet	\N					Agrio Formation	change in depositional environment	unstabilized	\N
Lower Cutler Beds	change in depositional environment	unstabilized	wet	\N					Agrio Formation	change in depositional environment	unstabilized	\N
Lower Cutler Beds	change in depositional environment	unstabilized	wet	\N					Agrio Formation	change in depositional environment	unstabilized	\N
Lower Cutler Beds	change in depositional environment	unstabilized	wet	\N					Agrio Formation	change in depositional environment	unstabilized	\N
Lower Cutler Beds	change in depositional environment	unstabilized	wet	\N					Agrio Formation	change in depositional environment	unstabilized	\N
Lower Cutler Beds	change in depositional environment	unstabilized	wet	\N					Agrio Formation	change in depositional environment	unstabilized	\N
Lower Cutler Beds	change in depositional environment	unstabilized	wet	\N					Agrio Formation	change in depositional environment	unstabilized	\N
Lower Cutler Beds	change in depositional environment	unstabilized	wet	\N					Agrio Formation	change in depositional environment	unstabilized	\N
Lower Cutler Beds	change in depositional environment	unstabilized	wet	\N					Agrio Formation	change in depositional environment	unstabilized	\N
Lower Cutler Beds	change in depositional environment	unstabilized	wet	\N					Agrio Formation	change in depositional environment	unstabilized	\N
Lower Cutler Beds	change in depositional environment	unstabilized	wet	\N					Agrio Formation	change in depositional environment	unstabilized	\N
Lower Cutler Beds	change in depositional environment	unstabilized	wet	\N					Agrio Formation	change in depositional environment	unstabilized	\N
Lower Cutler Beds	change in depositional environment	unstabilized	wet	\N			72		Agrio Formation	change in depositional environment	unstabilized	\N
Lower Cutler Beds	change in depositional environment	unstabilized	wet	\N					Tumblagooda Sandstone	change in depositional environment	unstabilized	\N
Guara Formation	change in depositional environment	unstabilized	wet	\N					Ingleside Formation	bypass	unstabilized	\N
Guara Formation	change in depositional environment	unstabilized	wet	\N					Ingleside Formation	bypass	unstabilized	\N
Guara Formation	change in depositional environment	unstabilized	wet	\N					Ingleside Formation	bypass	unstabilized	\N
Guara Formation	change in depositional environment	unstabilized	wet	\N					Ingleside Formation	bypass	unstabilized	\N
Guara Formation	change in depositional environment	unstabilized	wet	\N					Ingleside Formation	bypass	unstabilized	\N
Tumblagooda Sandstone	change in depositional environment	unstabilized	wet	\N					Ingleside Formation	bypass	unstabilized	\N
Tumblagooda Sandstone	change in depositional environment	unstabilized	wet	\N					Ingleside Formation	bypass	unstabilized	\N
Tumblagooda Sandstone	change in depositional environment	unstabilized	wet	\N					Ingleside Formation	bypass	unstabilized	\N
Escorihuela Formation/Pliocene and Pleistocene deposits of Teruel Basin	bypass	unstabilized	damp	\N					Chugwater Group	bypass	unstabilized	scours
Escorihuela Formation/Pliocene and Pleistocene deposits of Teruel Basin	bypass	unstabilized	damp	\N					Chugwater Group	bypass	unstabilized	scours
Escorihuela Formation/Pliocene and Pleistocene deposits of Teruel Basin	bypass	unstabilized	damp	\N					Chugwater Group	bypass	unstabilized	scours
Guara Formation	bypass	unstabilized	wet	\N					Chugwater Group	bypass	unstabilized	scours
Guara Formation	bypass	unstabilized	wet	\N					Chugwater Group	bypass	unstabilized	scours
Guara Formation	bypass	unstabilized	wet	\N					Chugwater Group	bypass	unstabilized	scours
Lower Cutler Beds	deflation	unstabilized	dry						Chugwater Group	bypass	unstabilized	scours
Lower Cutler Beds	deflation	unstabilized	dry						Chugwater Group	bypass	unstabilized	scours
Lower Cutler Beds	deflation	unstabilized	dry						Sergi Formation	bypass	unstabilized	\N
Arikaree Group	deflation	unstabilized	wet	armoured_lag					Sergi Formation	bypass	unstabilized	\N
Arikaree Group	deflation	unstabilized	wet	armoured_lag					Sergi Formation	bypass	unstabilized	\N
Arikaree Group	deflation	unstabilized	wet	armoured_lag					Sergi Formation	bypass	unstabilized	\N
Arikaree Group	deflation	unstabilized	wet	armoured_lag					Sergi Formation	bypass	unstabilized	\N
Arikaree Group	deflation	unstabilized	wet	armoured_lag					Sergi Formation	bypass	unstabilized	\N
Arikaree Group	deflation	unstabilized	wet	armoured_lag					Sergi Formation	bypass	unstabilized	\N
Arikaree Group	deflation	unstabilized	wet	armoured_lag					Sergi Formation	bypass	unstabilized	\N
Arikaree Group	deflation	unstabilized	wet	armoured_lag					Sergi Formation	bypass	unstabilized	\N
Arikaree Group	deflation	unstabilized	wet	armoured_lag					Sergi Formation	bypass	unstabilized	\N
Arikaree Group	deflation	unstabilized	wet	armoured_lag					Sao Sebastio Formation	bypass	unstabilized	\N
Arikaree Group	deflation	unstabilized	wet	armoured_lag					Sao Sebastio Formation	bypass	unstabilized	\N
Arikaree Group	deflation	unstabilized	wet	armoured_lag					Sao Sebastio Formation	bypass	unstabilized	\N
Arikaree Group	deflation	unstabilized	wet	armoured_lag					Sao Sebastio Formation	bypass	unstabilized	\N
Arikaree Group	deflation	unstabilized	wet	armoured_lag					Sao Sebastio Formation	bypass	unstabilized	\N
Arikaree Group	deflation	unstabilized	wet	armoured_lag					Sao Sebastio Formation	bypass	unstabilized	\N
Arikaree Group	deflation	unstabilized	wet	armoured_lag					Sao Sebastio Formation	bypass	unstabilized	\N
Arikaree Group	deflation	unstabilized	wet	armoured_lag					Sao Sebastio Formation	bypass	unstabilized	\N
Arikaree Group	deflation	unstabilized	wet	armoured_lag					Cedar Mesa Sandstone	deflation	stabilized	rhizoliths/rootlets
									Cedar Mesa Sandstone	deflation	stabilized	rhizoliths/rootlets,bioturbation
									Cedar Mesa Sandstone	deflation	stabilized	rhizoliths/rootlets,bioturbation
									Cedar Mesa Sandstone	deflation	stabilized	rhizoliths/rootlets,bioturbation
									Cedar Mesa Sandstone	deflation	stabilized	rhizoliths/rootlets
									Ingleside Formation	deflation	stabilized	rhizoliths/rootlets
									Ingleside Formation	deflation	stabilized	rhizoliths/rootlets
									Ingleside Formation	deflation	stabilized	rhizoliths/rootlets
									Ingleside Formation	deflation	stabilized	rhizoliths/rootlets
									Ingleside Formation	deflation	stabilized	rhizoliths/rootlets
									Tsondab Formation	deflation	stabilized	rhizoliths/rootlets,bioturbation
									Cedar Mesa Sandstone	deflation	stabilized	rhizoliths/rootlets
									Entrada Sandstone	deflation	stabilized	polygonal_features,scours
									Entrada Sandstone	deflation	stabilized	polygonal_features,scours
									Entrada Sandstone	deflation	unstabilized	scours
									Entrada Sandstone	deflation	unstabilized	scours
									Entrada Sandstone	deflation	unstabilized	scours
									Entrada Sandstone	deflation	unstabilized	scours
									Cedar Mesa Sandstone	deflation	unstabilized	rhizoliths/rootlets
									Entrada Sandstone	deflation	unstabilized	scours
									Rio Negro Formation	deflation	unstabilized	armoured_lag
									Rio Negro Formation	deflation	unstabilized	armoured_lag
									Rio Negro Formation	deflation	unstabilized	armoured_lag
									Rio Negro Formation	deflation	unstabilized	armoured_lag
									Rio Negro Formation	deflation	unstabilized	armoured_lag
									Ingleside Formation	deflation	unstabilized	armoured_lag,scours
									Entrada Sandstone	deflation	unstabilized	\N
									Entrada Sandstone	deflation	unstabilized	\N
									Entrada Sandstone	deflation	unstabilized	\N
									Entrada Sandstone	deflation	unstabilized	\N
									Entrada Sandstone	deflation	unstabilized	\N
									Entrada Sandstone	deflation	unstabilized	\N
									Entrada Sandstone	deflation	unstabilized	\N
									Entrada Sandstone	deflation	unstabilized	\N
									Entrada Sandstone	deflation	unstabilized	\N
									Wolfville Formation	deflation	unstabilized	armoured_lag
									Wolfville Formation	deflation	unstabilized	armoured_lag
									Wolfville Formation	deflation	unstabilized	armoured_lag
									Wolfville Formation	deflation	unstabilized	armoured_lag
									Wolfville Formation	deflation	unstabilized	armoured_lag
									Wolfville Formation	deflation	unstabilized	armoured_lag
									Wolfville Formation	deflation	unstabilized	armoured_lag
									Wolfville Formation	deflation	unstabilized	armoured_lag
									Wolfville Formation	deflation	unstabilized	armoured_lag
									Wolfville Formation	deflation	unstabilized	armoured_lag
									Wolfville Formation	deflation	unstabilized	armoured_lag
									Wolfville Formation	deflation	unstabilized	armoured_lag
									Wolfville Formation	deflation	unstabilized	armoured_lag
									Wolfville Formation	deflation	unstabilized	armoured_lag
									Wolfville Formation	deflation	unstabilized	armoured_lag
									Wolfville Formation	deflation	unstabilized	armoured_lag
									Wolfville Formation	deflation	unstabilized	armoured_lag
									Wolfville Formation	deflation	unstabilized	armoured_lag
									Wolfville Formation	deflation	unstabilized	armoured_lag
									Wolfville Formation	deflation	unstabilized	armoured_lag
									Wolfville Formation	deflation	unstabilized	armoured_lag
									Rotliegends Group	deflation	unstabilized	armoured_lag
									Rotliegends Group	deflation	unstabilized	armoured_lag

[truncated: 1 more sheets: Figure 13]
